# Supplementary material
Source: HighWire-hosted journal article supplement (https://jnm.snmjournals.org/highwire/filestream/94811/field_highwire_adjunct_files/0/156505_Supplemental_Data.pdf)

**Supplemental Table 1: Anatomical Location of Tumors by Patient**

| Subject | Tumor Number | Location                                                                                                                                                                            |
|---------|--------------|-------------------------------------------------------------------------------------------------------------------------------------------------------------------------------------|
| A       | 1            | Left Supraclavicular/cervical lymphadenopathy                                                                                                                                       |
| B       | 1            | Splenic metastases                                                                                                                                                                  |
|         | 2            | Liver metastases, posterior                                                                                                                                                         |
|         | 3            | Peritoneal deposit (infra-hepatic)                                                                                                                                                  |
|         | 4            | Pelvic mass Note: Tumor 4 was not within the field of view (FoV) in Week 4 scan due to patient being malpositioned thus excluding the anatomical region outside of the scanner FoV) |
| C       | 1            | Suprasplenic metastases                                                                                                                                                             |
|         | 2            | Liver metastases , mid liver (segment 7)                                                                                                                                            |
|         | 3            | Splenic metastases                                                                                                                                                                  |
|         | 4            | Liver metastases, inferior (segment 6)                                                                                                                                              |
|         | 5            | Pelvic mass                                                                                                                                                                         |
| D       | 1            | Pelvic mass (posterior) – just anterior to lower sacrum                                                                                                                             |
|         | 2            | Pelvic mass (anterior)                                                                                                                                                              |
|         | 3            | Upper abdominal mass (level of L3-L4)                                                                                                                                               |
|         | 4            | Pelvic mass (mid); right sided – anterior to upper sacrum                                                                                                                           |
| E       | 1            | Para aortic lymphadenopathy (level of L1; left)                                                                                                                                     |
|         | 2            | Para caval lymphadenopathy (superior; level of L1-L2; right)                                                                                                                        |
|         | 3            | Para caval lymphadenopathy (inferior; level of L3; right)                                                                                                                           |
|         | 4            | Para aortic/Iliac lymphadenopathy (level of L2-L3)                                                                                                                                  |
| F       | 1            | Bowel/Descending colon(left side)                                                                                                                                                   |
|         | 2            | Para aortic and iliac lymphadenopathy (left)                                                                                                                                        |
|         | 3            | Para caval and iliac lymphadenopathy (inferior, right)                                                                                                                              |
|         | 4            | Para caval lymphadenopathy (right)                                                                                                                                                  |
|         | 5            | Liver metastases                                                                                                                                                                    |
|         | 6            | Cardiophrenic angle lymph node                                                                                                                                                      |
| G       | 1            | Para caval lymphadenopathy (right)                                                                                                                                                  |
|         | 2            | Left Iliac lymphadenopathy                                                                                                                                                          |
|         | 3            | Right Iliac lymphadenopathy                                                                                                                                                         |
|         | 4            | Sacral metastases                                                                                                                                                                   |
|         | 5            | Right Iliac/Inguinal                                                                                                                                                                |
|         | 6            | Lumbar metastases                                                                                                                                                                   |
| H       | 1            | Liver metastases, superior (segment 2)                                                                                                                                              |
|         | 2            | Liver metastases (segment 5)                                                                                                                                                        |
|         | 3            | Liver metastases (segment 5; lateral to tumor 2)                                                                                                                                    |
|         | 4            | Right lung, posterior                                                                                                                                                               |
|         | 5            | Right lung, lateral                                                                                                                                                                 |
|         | 6            | Liver metastases (segment 8)                                                                                                                                                        |
|         | 7            | Diaphragmatic lymph node                                                                                                                                                            |
|         | 8            | Liver metastases (segment 2)                                                                                                                                                        |
| I       | 1            | Liver metastases, superior (segment 5)                                                                                                                                              |

| Subject | Tumor Number | Location                                                                                                                                                                                                       |
|---------|--------------|----------------------------------------------------------------------------------------------------------------------------------------------------------------------------------------------------------------|
|         | 2            | Liver metastases (segment 4)                                                                                                                                                                                   |
|         | 3            | Omental metastases (perigastric)                                                                                                                                                                               |
|         | 4            | Perisplenic metastases (median)                                                                                                                                                                                |
|         | 5            | Porta hepatis lymphadenopathy                                                                                                                                                                                  |
|         | 6            | Para aortic lymphadenopathy (left)                                                                                                                                                                             |
|         | 7            | Para caval lymphadenopathy (right)                                                                                                                                                                             |
|         | 8            | Peritoneal deposit (right abdomen)                                                                                                                                                                             |
| J       | 1            | Liver metastases (segment 2)                                                                                                                                                                                   |
|         | 2            | Peritoneal deposit, abdomen                                                                                                                                                                                    |
|         | 3            | Liver metastases (segment 4)                                                                                                                                                                                   |
|         | 4            | Liver metastases (segment 5)                                                                                                                                                                                   |
|         | 5            | Liver metastases (segment 8)                                                                                                                                                                                   |
|         | 6            | Liver metastases (segment 4)                                                                                                                                                                                   |
|         | 7            | Liver metastases (segment 6)                                                                                                                                                                                   |
|         | 8            | Liver metastases (segment 6)                                                                                                                                                                                   |
|         | 9            | Liver metastases (segment 6)                                                                                                                                                                                   |
| K       | 1            | Liver, inferior (segment 6)                                                                                                                                                                                    |
|         | 2            | Liver, post-superior (segment 7)                                                                                                                                                                               |
|         | 3            | Spleen, inferior                                                                                                                                                                                               |
|         | 4            | Liver, superior most (segment 8)                                                                                                                                                                               |
|         | 5            | Spleen, superior                                                                                                                                                                                               |
| L       | 1            | Para-aortic lymphadenopathy (superior; left sided)                                                                                                                                                             |
|         | 2            | Para-caval lymphadenopathy (superior; right sided)                                                                                                                                                             |
|         | 3            | Para-aortic (inferior) /left iliac lymphadenopathy<br><b>NOTE:</b> Tumor 3 was not within the field of view (FoV) in Week 4 scan as a different scanner with a smaller FoV was used due to technical problems. |

**Supplemental Table 2: List of Antibodies for IHC Staining of Tumor Biopsies**

| <b>Biomarker tested</b>                                      | <b>Origin of monoclonal antibody</b> | <b>Catalog Name</b> | <b>Catalog Number</b> |
|--------------------------------------------------------------|--------------------------------------|---------------------|-----------------------|
| AKT (pan)(clone 11E7)                                        | Rabbit                               | Cell Signaling      | 4685                  |
| pAKT (Ser473 clone 14-5)                                     | Mouse                                | DAKO                | M362801               |
| pPRAS40 (clone C77D7)                                        | Rabbit                               | Cell Signaling      | 2997                  |
| Total PRAS40 (cloneD23C7)                                    | Rabbit                               | Cell Signaling      | 2691                  |
| Total ERK (p44/42 MAPK (ERK 1/2), clone 3A7)                 | Mouse                                | Cell Signaling      | 9107                  |
| pERK (phopho-p44/42 MAPK (pERK), clone 20G11)                | Rabbit                               | Cell Signaling      | 4376                  |
| ppERK (Anti-MAPK or diphosphorylated ERK 1/2, clone MAPK-YT) | Mouse                                | Sigma               | M8159                 |
| Cleaved caspase 3 (ASP175 clone 5A1E)                        | Rabbit                               | Cell Signaling      | 9664                  |
| Ki67 (clone Mib-1)                                           | Mouse                                | DAKO                | M724001               |

**Supplemental Table 3: Illumina Panel Gene List with Sequences**

| Gene     | AA/Change Type | Sequence                                                                                                           |
|----------|----------------|--------------------------------------------------------------------------------------------------------------------|
| ADAM12   | D51G           | GAACCAAGGAAGAGCTGATGAAGTTGTCAGTGCCTCTGTTGGGAGT<br>GGGG[A/G]CCTCTGGATCCCAGTGAAGAGCTTCGACTCCAAGGTGA<br>GTTCTCTCCTT   |
| ADAM12   | A190T          | AAAGCGTCCGGGATCATGTGGATCACATCACAACACACCAAACCT<br>CGCT[G/A]CAAAGAATGTGTTTCCACCACCCTCTCAGACATGGGC<br>AAAGGGTAAGG     |
| ADAM12   | D301H          | ATGAATTTCTGGACTGGAGGAAGATGAAGCTTCTACCTCGCAAATC<br>CCAT[G/C]ACAATGCGCAGCTTGTGAGGTAGGGAGTTACGTCTTGT<br>TGCTTAAAAA    |
| ADAM12   | G479E          | CCGGGTGCATGTGTCATAAATGGCCCTCTCCTTCCAGCTGAAGCCT<br>GCAG[G/A]AACAGCGTGCAGGGACTCCAGCAACTCCTGTGACCTCC<br>CAGAGTTCTGCA  |
| ADAM12   | L792F          | GCTATAGCATGGCTTTTTACTTTGACTGTACAGGACAATCCCAGGA<br>GATT[G/T]CTGCAGTGTGAGAATGTTGACATCAGCAGACCCCTCAAC<br>GGCCTGAATGT  |
| ADAMTS18 | R382K          | GAATAGTTTTTGTCAATGGCAGTCTGCCCTCATTGGAAAGAATGGC<br>AAGA[G/A]ACATGATCATGCCATCTTACTAACAGGATTTGATATTTGT<br>TCTTGGAAGA  |
| ADAMTS18 | A696fs*18      | GAAGATCGATGCAAACCTGACTGCAAGGCTGAGAACTTTGAATTTTT<br>TTTT[T]TGCAATGTCCGGCAAAGTGAAGATGGAACCTCCCTGCTCCC<br>CAAACAAAAAT |
| ADAMTS18 | K455T          | CTGTTTCAGCTTTGGTATGATTCACGATGGAGAAGGGAATCCCTGC<br>AGAA[A/C]GGCTGAAGGCAATATCATGTCTCCCACTGACCGGAA<br>CAATGGAGTGT     |
| ADAMTS18 | S156fs*19      | GAGGTGCAGCAATGCTTCTATCAGGGATTTATCAGAAATGACAGCT<br>CCTC[CT]CTGTGCTGTGTCTACGTGTGCTGGCTTGGTAAGTACAC<br>CCCAGTCTGAG    |
| ADAMTSL3 | A1315E         | CAACCATCTGTCTGTTGTGGTTGGAGGCATCGTGGAGGCAGCCCTT<br>GGAG[C/A]AAACGTGACAATCCGATGTCCTGTAAAAGGTAAGTGTGG<br>TCATTTCAAGT  |
| ADAMTSL3 | D1482N         | GTGATCACCTCCAGAAGCCACTGGCTGGGTTTGGAGCCCTGTAACAT<br>CCGG[G/A]ACTGCCAGCGAGGTAAGTGAAGTCACTCTTTGTATCTC<br>ATCAACACCAA  |
| ADAMTSL3 | I1645F         | GGAGTTGCAAACCTGTGGCCAAGAGACACTGTGTACAGAAAAAGAA<br>ACCA[AT]TTTCTGGCGGCACTGTCTTGGGCCCTCCTGTGATAGTA                   |

|          |        |                                                                                                                                                                         |
|----------|--------|-------------------------------------------------------------------------------------------------------------------------------------------------------------------------|
|          |        | CGTACACCTCC                                                                                                                                                             |
| ADAMTSL3 | R587H  | AGAACCCTGGTCAGCCTGCAGTACCACGTGTGGGCCGGGTGTGCA<br>GGTCC[G/A]TGAGGTGAAGTGCCGTGTGCTCCTCACATTCACGCAG<br>ACTGAGACTGAGC                                                       |
| ADAMTSL3 | R855C  | GAATCCAGAGAAGAAAGCAGGTGTGTCAAAGGCTGGCAGCCAAAG<br>GTCGG[C/T]GCATCCCCCTCAGTGAGATGATGTGCAGGGATCTACC<br>AGGGCTCCCTCTT                                                       |
| ADAMTSL3 | V330M  | TTCTCACAGTTCTCTTTGTCCAGACCAGGTACACTGCAGCCAAAGA<br>CAGC[G/A]TGGTTCAGTTCTTCTTTTACCAGCCCATCAGTCATCAGT<br>GGAGACAAACT                                                       |
| ADAMTSL3 | W343C  | AAAGACAGCGTGGTTCAGTTCTTCTTTTACCAGCCCATCAGTCATCA<br>GTG[G/C]AGACAAACTGACTTCTTCCCTGCACTGTGACGTGTGGAG<br>GAGGTGAGGC                                                        |
| ADAMTSL3 | W81*   | TCAAGAAACACTCGTTCAGATGAAGACAAAGATGGCAACTGGGATG<br>CTTG[G/A]GGCGACTGGAGTGACTGCTCCCGGACCTGTGGGGGAG<br>GAGCATCATATTC                                                       |
| AIM1     | A53S   | ACGACGCGGTGTTCGACGACGAGGTGGCGCCAAACGCGGCCAGC<br>GATAAC[G/T]CCTCGGCGGAAAAGAAAGTGAAATCTCCGCGGGCAG<br>CCCTCGACGGGGGC                                                       |
| AIM1     | E498G  | TGTTCAATCACCCATAAGCAGTTTCCCATGCACTGATCTAAAAGTGT<br>CAG[A/G]AAACCATAAAGGATGTGTTTTGCCTGTGTCTCGTCAGAAC<br>AATGAGAAAA                                                       |
| AIM1     | I1639T | CTTACAGCTGGATACATATTTAAGATATCTGGTCTTTTCCACTGAGC<br>AGA[T/C]AGCAGAAGACTGCTGCCTGACGATTGTGGGCAGCCTGGT<br>AACATCTGGCT                                                       |
| AKT1     | E17K   | GTCTGACGGGTAGAGTGTGCGTGGCTCTCACCACCCGCACGTCTG<br>TAGGG[A/G]AGTACATCAAGACCTGGCGGCCACGCTACTTCCTCCT<br>CAAGAATGATGGC                                                       |
| AKT2     | R371H  | GCCTGCCCTTCTACAACCAGGACCACGAGCGCCTCTTCGAGCTCAT<br>CCTCATGGAAGAGATCCGCTTCCCGC[G/A]CACGCTCAGCCCCGAG<br>GCCAAGTCCCTGCTTGCTGGGCTGCTTAAGAAGGACCCCAAGCAG<br>AGGTGAGGGCTGGCGT  |
| AKT2     | S302G  | GACTTTTCCAACAGCTGGAAAACCTCATGCTGGACAAAGATGGCCA<br>CATCAAGATCACTGACTTTGGCCTCTGCAAAGAGGGGCATC[a/g]GTG<br>ACGGGGCCACCATGAAAACCTTCTGTGGGACCCCGGAGTACCTGG<br>CGCCTGAGGTGTCTG |
| AKT3     | E17K   | GCTGCTGTTCATTTTTTTTTTCAGCATTAAACATGCGTGCTTTCCTCATGT<br>AGGA[G/A]AATATATAAAAAACTGGAGGCCAAGATACTTCCTTTTGAA                                                                |

|      |        |                                                                                                                    |
|------|--------|--------------------------------------------------------------------------------------------------------------------|
|      |        | GACAGA                                                                                                             |
| ALK  | F1245I | ACGTGGCTCGGGACATTGCCTGTGGCTGTCAGTATTTGGAGGAAAA<br>CCAC[A/T]TCATCCACCGGTGAGTCAAAGTGACTGTGCTCTTCCTGT<br>CATCCTGTCGC  |
| ALK  | F1174L | ACTCAGCTCAGTTAATTTTGGTTACATCCCTCTCTGCTCTGCAGCAA<br>ATT[A/C]AACCACCAGAACATTGTTTCGCTGCATTGGGGTGAGCCTGC<br>AATCCCTGCC |
| ALK  | F1245C | CGTGGCTCGGGACATTGCCTGTGGCTGTCAGTATTTGGAGGAAAAC<br>CACT[T/G]CATCCACCGGTGAGTCAAAGTGACTGTGCTCTTCCTGTC<br>ATCCTGTCGCT  |
| ALK  | F1245L | GTGGCTCGGGACATTGCCTGTGGCTGTCAGTATTTGGAGGAAAACC<br>ACTT[C/G]ATCCACCGGTGAGTCAAAGTGACTGTGCTCTTCCTGTCA<br>TCCTGTCGCTG  |
| ALK  | F1245L | GTGGCTCGGGACATTGCCTGTGGCTGTCAGTATTTGGAGGAAAACC<br>ACTT[A/C]ATCCACCGGTGAGTCAAAGTGACTGTGCTCTTCCTGTCA<br>TCCTGTCGCTG  |
| ALK  | F1245V | ACGTGGCTCGGGACATTGCCTGTGGCTGTCAGTATTTGGAGGAAAA<br>CCAC[T/G]TCATCCACCGGTGAGTCAAAGTGACTGTGCTCTTCCTGT<br>CATCCTGTCGC  |
| ALK  | L560F  | TGCTCCTTCCCGGTTTTGTTCTCCACTAGCACCAAGGACACGTTTC<br>CCCT[C/G]AAGACTCCACGAATGAGCCAGGACATTCGGAGCTGTGA<br>GGGCGAGAAGAG  |
| ALK  | R1275Q | CTGTCCAGGCCCTGGAAGAGTGGCCAAGATTGGAGACTTCGGGAT<br>GGCCC[A/G]AGACATCTACAGGTGAGTAAAGACTGCCTCACCCCTC<br>CGGGCCTGTCTCT  |
| ARAF | G331C  | AGAGGATCGGGACGGGCTCGTTTGGCACCGTGTTCGAGGGCGGT<br>GGCAT[T/G]GCGATGTGGCCGTGAAGGTGCTCAAGGTGTCCCAGCC<br>CACAGCTGAGCAG   |
| BRAF | G466V  | TTGGGAGATTCTGATGGGCAGATTACAGTGGGACAAAGAATTGGA<br>TCTG[T/G]ATCATTGGAACAGTCTACAAGGGAAAGTGGCATGGTAA<br>GTATGTAATGT    |
| BRAF | G469A  | TCCTGATGGGCAGATTACAGTGGGACAAAGAATTGGATCTGGATCA<br>TTTG[C/G]AACAGTCTACAAGGGAAAGTGGCATGGTAAAGTATGTAAT<br>GTGGTGACATT |
| BRAF | L597V  | CAGATATATTTCTTCATGAAGACCTCACAGTAAAAATAGGTGATTTT<br>GGT[C/G]TAGCTACAGTGAAATCTCGATGGAGTGGGTCCCATCAGTT<br>TGAACAGTTG  |

|      |       |                                                                                                                    |
|------|-------|--------------------------------------------------------------------------------------------------------------------|
| BRAF | V600E | TCTTCATGAAGACCTCACAGTAAAAATAGGTGATTTTGGTCTAGCTA<br>CAG[A/T]GAAATCTCGATGGAGTGGGTCCCATCAGTTTGAACAGTTG<br>TCTGGATCCA  |
| BRAF | V600E | TCTTCATGAAGACCTCACAGTAAAAATAGGTGATTTTGGTCTAGCTA<br>CAG[A/T]GAAATCTCGATGGAGTGGGTCCCATCAGTTTGAACAGTTG<br>TCTGGATCCA  |
| BRAF | V600E | TCTTCATGAAGACCTCACAGTAAAAATAGGTGATTTTGGTCTAGCTA<br>CAG[A/T]GAAATCTCGATGGAGTGGGTCCCATCAGTTTGAACAGTTG<br>TCTGGATCCA  |
| BRAF | D594G | CTACACCTCAGATATATTTCTTCATGAAGACCTCACAGTAAAAATAG<br>GTG[A/G]TTTTGGTCTAGCTACAGTAAATCTCGATGGAGTGGGTCC<br>CATCAGTTTG   |
| BRAF | K601E | TTCATGAAGACCTCACAGTAAAAATAGGTGATTTTGGTCTAGCTACA<br>GTG[A/G]AATCTCGATGGAGTGGGTCCCATCAGTTTGAACAGTTGTC<br>TGGATCCATT  |
| BRAF | T529I | TATCCTACTCTTCATGGGCTATTCCACAAAGCCACAACCTGGCTATTG<br>TTA[T/C]CCAGTGGTGTGAGGGCTCCAGCTTGTATCACCATCTCCAT<br>ATCATTGAGA |
| BRAF | T529N | TATCCTACTCTTCATGGGCTATTCCACAAAGCCACAACCTGGCTATTG<br>TTA[A/C]CCAGTGGTGTGAGGGCTCCAGCTTGTATCACCATCTCCAT<br>ATCATTGAGA |
| BRAF | V471F | ATGGGCAGATTACAGTGGGACAAAGAATTGGATCTGGATCATTGGG<br>ACA[T/G]TCTACAAGGGAAAGTGGCATGGTAAGTATGTAATGTGGT<br>GACATTGTGAC   |
| BRAF | V600A | TCTTCATGAAGACCTCACAGTAAAAATAGGTGATTTTGGTCTAGCTA<br>CAG[T/C]GAAATCTCGATGGAGTGGGTCCCATCAGTTTGAACAGTTG<br>TCTGGATCCA  |
| BRAF | V600G | TCTTCATGAAGACCTCACAGTAAAAATAGGTGATTTTGGTCTAGCTA<br>CAG[T/G]GAAATCTCGATGGAGTGGGTCCCATCAGTTTGAACAGTTG<br>TCTGGATCCA  |
| BRAF | V600M | TTCTTCATGAAGACCTCACAGTAAAAATAGGTGATTTTGGTCTAGCT<br>ACA[A/G]TGAATCTCGATGGAGTGGGTCCCATCAGTTTGAACAGTT<br>GTCTGGATCC   |
| CDK4 | R24C  | AGCCAGTGGCTGAAATTGGTGTCCGGTGCCTATGGGACAGTGTACAA<br>GGCC[T/C]GTGATCCCCACAGTGGCCACTTTGTGGCCCTCAAGAGT<br>GTGAGAGTCCCC |
| CDK4 | R24H  | GCCAGTGGCTGAAATTGGTGTCCGGTGCCTATGGGACAGTGTACAA<br>GGCCC[A/G]TGATCCCCACAGTGGCCACTTTGTGGCCCTCAAGAGT                  |

|                  |              |                                                                                                                    |
|------------------|--------------|--------------------------------------------------------------------------------------------------------------------|
|                  |              | GTGAGAGTCCCCA                                                                                                      |
| CDKN2A           | cytogenetics | TTTCTTATATTTTCATAGTATGAAAAATCTAAAAAGTAACCCATATGTA<br>AA[T/A]ATTTAAATCATGATAGAAATCCAAAGCAAAAAGAAAATGAAT<br>CAATTGA  |
| CDKN2A           | cytogenetics | TTTAAGACATATTTAAAGAATAACATCAGCACTTAGCAATGAACTGG<br>AGA[T/G]GGAAGATGAGGGAAGGGAAGGTGTTAGGCAGGTTTTTAC<br>AATGAGAGAGG  |
| CDKN2A           | cytogenetics | GTTTGCAGAGTGAAAATAAGATGGTTCGGTTAGGAAGTTTGAGAATC<br>GTAA[A/T]GGTTTTGGAATACCTCTTATGAGTAGAGAGGATGGGTTGA<br>GTAAGACTCA |
| CDKN2A           | E120K        | GCCCCCGCAGCCGCGCGCAGGTACCGTGCACATCGCGATGGC<br>CCAGCT[C/T]CTCAGCCAGGTCCACGGGCAGACGGCCCCAGGCATC<br>GCGCACGTCCAGCC    |
| CDKN2A           | R58*         | GTCGGCGCAGTTGGGCTCCGCGCCGTGGAGCAGCAGCAGCTCCG<br>CCTACTC[G/A]GGCGCTGCCCATCATCATGACCTGCCAGAGAGAACA<br>GAATGGTCAGAGCC |
| CDKN2A           | R80*         | TGCTGCTCCACGGCGCGGAGCCCAACTGCGCCGACCCCGCCACTC<br>TCACC[C/T]GACCCGTGCACGACGCTGCCCGGGAGGGCTTCCTGGA<br>CACGCTGGTGGTG  |
| CDKN2A           | Y44*         | TCCCCTGCTCCCGCTGCAGACCCTCTACCCACTGGATCGGCCTC<br>CGACC[G/T]TAACTATTCGGTGCGTTGGGCAGCGCCCCCGCCTCCA<br>GCAGCGCCCGCAC   |
| chr18q_arm1_40Mb | cytogenetics | TATATCCATATCTATATTTAGGTCTCTAACCATATGCCTTTGCATTGA<br>GG[G/T]CACTATTGTCTTCAACAGCTGGTGGTAATCTAATACTCCCC<br>TATTTGGGT  |
| chr18q_arm2      | cytogenetics | CACTCCAGCCTGGGCAACAAAAGTGAAACTCTGTCTCAAAAAGTGA<br>AAAA[A/G]TAAAATGAATCCGTCTGGCACAGTGGCTCACCCCTGTAA<br>TCCTAGCGCTT  |
| chr18q_arm3      | cytogenetics | AAGACTGAAAAATTAGAAGGCGGGAAGTGGAGCGCGATGCCAAC<br>AGAGA[G/C]CGGTGCTTCCCTGCGGGCTCAGCGTCTTTACGCTCTT<br>CAGATGAAGGGTT   |
| chr8_p_arm       | cytogenetics | AACAGTAACTAAGAACAGAGAAGAGTGCAAAGGGATTCTGACCAAA<br>TTAT[A/G]GAAAAATCGAAGCGTGCATAGGATGTTCCGCATCTCAA<br>TGCCATTAGC    |
| chr8_p_arm       | cytogenetics | CAATTCAAAGTAACTTCATTTTCCCCTGTGGAGTACTGAAAATTACT<br>GTA[A/T]CTTATAATTTTATGGTAATTATAGTGAGAACTCCCATAATTA<br>GTGTAGC   |



|             |              |                                                                                                                   |
|-------------|--------------|-------------------------------------------------------------------------------------------------------------------|
| Chr8_p_arm2 | cytogenetics | TTAGTGAGATTGAACATCTTTTAATATTGGTAATTTAGATTTCTTTT<br>CT[G/A]TGCATTCTGTATTCATATGCTTTGCACAGTATTCTTTTGAGTT<br>GTTTTAT  |
| Chr8_p_arm3 | cytogenetics | GCAAAGGGGTCAGGGAAATATTCTCCTCTGGTAGGTTTTCTGTTTT<br>CAT[C/G]AACTTATCTGCTTTCTTCTCCTCTCCTCTGCAGCTTAG<br>GTTCCATGG     |
| CPAMD8      | K845M        | CATGAGCCAATGCCACCCTCTGCAGGTGTACATGAAGCTCTCGGTT<br>CCCA[A/T]GGGCATCCAGTTTGTGGGCATCCTGGCAAACGCCATGT<br>GACCAAGAAGA  |
| CPAMD8      | R558H        | TGTGACCTCTTTCATCTGGCCGTGACCCCCAGCATGGTCCCCCTT<br>GGTC[G/A]CCTGCTGGTCTTCTACGTCAGGGAGAATGGAGAAGGGG<br>TCGCCGACAGCC  |
| CPAMD8      | V1001I       | GTGTGGCCTTGTCTTCTGGGCCCCAGGACACAGCAGGCATGATCG<br>AGATC[G/A]TCCTGGGGGGGCATCAGAACACCAGGTCATGGATCTC<br>CACCAGCAAGATG |
| CPAMD8      | V1228L       | TCACAGCCTTTGTCCTGAAGTCCTTCGCACAGGCTCGCAGCTTTAT<br>CTTC[G/C]TGGACCCCGGGAGCTGGCTGCCGCCAAGAGCTGGAT<br>CATCCAGCAGCAG  |
| CSMD3       | L3444I       | TTCCATCTCATGGGTATACACTGATTTATACCTGTCAGCCTGGCTTC<br>TTC[T/A]TAGCAGGTGGAACAGAACATAGAGTGTGTAGATCCGATAA<br>CACCTGGACT |
| CSMD3       | L3444I       | TTCCATCTCATGGGTATACACTGATTTATACCTGTCAGCCTGGCTTC<br>TTC[T/A]TAGCAGGTGGAACAGAACATAGAGTGTGTAGATCCGATAA<br>CACCTGGACT |
| CSMD3       | R3079H       | CGGCCATGGCTCTAGACAGGAAAGCAATTTCAGAACTAAAAGTACT<br>GTAC[G/A]TTATGCTTGTGATACTGGTTACATCCTTCATGGCTCAGAA<br>GAAAGAACAT |
| CSMD3       | Splice Site  | ATATCTATTGTAATTTTAAAGGACTAATATCTTTTTAATCTTCATTTT<br>A[G/C]AGCCTACCCAAACCTCTTGTGAAAACCCAGGTGTGCCTCGG<br>CATGGATCT  |
| CSMD3       | D1548fs*19   | CAGGGGTCCCCATGAATGGGACTCGAAATGGGGATGGAAGAGAAC<br>CTGGG[G]JACACTGTTGTTTTTCAATGTGACCCAGGATATGAACTTC<br>AAGGAGAGGAA  |
| CSMD3       | D3058N       | GTAACTTGAAGTGTACTGCATTGCAGGTGATGCTACTGGGACATG<br>TGGC[G/A]ATCCAGGTACTCCCGGCCATGGCTCTAGACAGGAAAGC<br>AATTCAGAACT   |
| CSMD3       | D607H        | ATTTTGAAGAATTTGATCTGGAGATTGGCTATGATACCTTGACAATT<br>GGC[G/C]ATGGGGGCGAAGTTGGAGATCCTAGGACAGTGCTCCAAG                |

|        |        |                                                                                                                    |
|--------|--------|--------------------------------------------------------------------------------------------------------------------|
|        |        | TGTAAGTTCCC                                                                                                        |
| CSMD3  | G1543R | CTGCGTGTCTGACCCAGGGGTCCCCATGAATGGGACTCGAAATG<br>GGGAT[G/A]GAAGAGAACCTGGGGACACTGTTGTTTTCAATGTGAC<br>CCAGGATATGAA    |
| CSMD3  | N1961S | TAAGCGCAAAGGGACTATTTTGTACCTGGATACCCTGAGCCTTAT<br>GACA[A/G]CAATCTGAATTGTGTGTGGAAGATCACAGTGCCAGAGG<br>GAGCTGGCATT    |
| CSMD3  | N409D  | AGGAACAGCGAGTGCAAGTTACGAGTCTCAGAAATTCAGGTCTGGA<br>CCCC[A/G]ACACGTCCAAGGACGGGCTCTCCTCATCCAGCAGAT<br>ACACAAAGTACC    |
| CSMD3  | R2231Q | CCTCTTCCAGCCTATCAGTTGCAAAGCTGTCCTGATCCACGCCCG<br>TTTC[G/A]AAATGGTTTTGTAATTGGTAATGATTTACTGTGGGTCAA<br>ACCATTTTCA    |
| CSMD3  | R3359Q | CTTCATTTTAGAGCCTACCCAAACCTCTTGTAACCCAGGTGTGC<br>CTC[G/A]GCATGGATCTCAGAACAAATACATTCCGATTTCAAGTGGGT<br>ACTTTAGCTA    |
| CSMD3  | S162N  | AAGTACCAAATCTGTGTTCTCACTACGTTTGACCAGTGATTTTGCAG<br>TTA[G/A]TGCTCATGGATTTAAGGTATATTACGAAGGTAAGTGATGGT<br>AGTGGCAA   |
| CSMD3  | V3561L | TATATAAAAGCCAGGAAGCTCGCCTAATGTTACGCATATATCTTATT<br>AAA[G/T]TACCTGCTCATGCTTCTGTGAAGAAAATGAAGGAAGAAAA<br>TTGGGCAATG  |
| CSMD3  | V396M  | TATCCAGTGTTACAGCTGTCAACCATCCATAGACTTTCCGAGGAACA<br>GCGA[G/A]TGCAAGTTACGAGTCTCAGAAATTCAGGTCTGGACCCCA<br>ACACGTCCAAG |
| CSMD3  | V575F  | CCTTACATCTCCCAACTTTCCGTTCCAGTATGACAGCAATGCACAA<br>TGT[G/T]TCTGGGTCATCACAGCAGTGAATACAAATAAGGTAAGAGA<br>ACACCATCTG   |
| CSMD3  | W2745C | TATCATGGACTAGGTCCCTGCCTCCATCGAATGTCTTCTAATGGTAC<br>TTG[G/C]AGTTGGAGAAATGAAAGACCATATTGCCAAAGTAAGTATA<br>CACTCTGCTA  |
| CTNNB1 | S33C   | AGACAGAAAAGCGGCTGTTAGTCACTGGCAGCAACAGTCTTACCTG<br>GACT[C/G]TGGAATCCATTCTGGTGCCACTACCACAGCTCCTTCTCT<br>GAGTGGTAAAG  |
| CTNNB1 | S37C   | GGCTGTTAGTCACTGGCAGCAACAGTCTTACCTGGACTCTGGAATC<br>CATT[C/G]TGGTGCCACTACCACAGCTCCTTCTCTGAGTGGTAAAGG<br>CAATCCTGAGG  |

|        |              |                                                                                                                    |
|--------|--------------|--------------------------------------------------------------------------------------------------------------------|
| CTNNB1 | S45F         | GTCTTACCTGGACTCTGGAATCCATTCTGGTGCCACTACCACAGCT<br>CCTT[C/T]TCTGAGTGGTAAAGGCAATCCTGAGGAAGAGGATGTGGA<br>TACCTCCCAAG  |
| CTNNB1 | S45P         | AGTCTTACCTGGACTCTGGAATCCATTCTGGTGCCACTACCACAGC<br>TCCT[T/C]CTCTGAGTGGTAAAGGCAATCCTGAGGAAGAGGATGTG<br>GATACCTCCCAA  |
| CTNNB1 | T41A         | ACTGGCAGCAACAGTCTTACCTGGACTCTGGAATCCATTCTGGTGC<br>CACT[A/G]CCACAGCTCCTTCTCTGAGTGGTAAAGGCAATCCTGAGG<br>AAGAGGATGTG  |
| CTNNB1 | G34E         | CAGAAAAGCGGCTGTTAGTCACTGGCAGCAACAGTCTTACCTGGAC<br>TCTG[A/G]AATCCATTCTGGTGCCACTACCACAGCTCCTTCTCTGAG<br>TGGTAAAGGCA  |
| CTNNB1 | D32Y         | AACCAGACAGAAAAGCGGCTGTTAGTCACTGGCAGCAACAGTCTTA<br>CCTG[G/T]ACTCTGGAATCCATTCTGGTGCCACTACCACAGCTCCTT<br>CTCTGAGTGGT  |
| CTNNB1 | S33Y         | AGACAGAAAAGCGGCTGTTAGTCACTGGCAGCAACAGTCTTACCTG<br>GACT[A/C]TGGAAATCCATTCTGGTGCCACTACCACAGCTCCTTCTCT<br>GAGTGGTAAAG |
| CTNNB1 | S37F         | GGCTGTTAGTCACTGGCAGCAACAGTCTTACCTGGACTCTGGAATC<br>CATT[C/T]TGGTGCCACTACCACAGCTCCTTCTCTGAGTGGTAAAGG<br>CAATCCTGAGG  |
| CTNNB1 | T41I         | CTGGCAGCAACAGTCTTACCTGGACTCTGGAATCCATTCTGGTGCC<br>ACTA[T/C]CACAGCTCCTTCTCTGAGTGGTAAAGGCAATCCTGAGGA<br>AGAGGATGTGG  |
| CYLD1  | cytogenetics | TGTGTGTATATATGTATGTGGCGGAGAGGGAGAGAGTGGGGAAGG<br>AGAGC[A/T]GTGTTATCATACATAGAGAGGCTAAATGTGTCCCATCC<br>CTCACTGTCAGC  |
| CYLD1  | cytogenetics | CAATTAATAATTTAAAGATGATTACATAATAATTTGCACACAAGCAA<br>GA[T/G]CTTAACATACTTCAGGAAAGTGGATTTAGAGTTCTCTACAAA<br>ATGAAGTG   |
| CYLD1  | cytogenetics | GGTATATCATAGCCTTCAGGTTTTTTGATTATCATCTGTTTGTATTTG<br>TT[G/A]TGGGTCTCCAGAATCTCCTGTTTTGTTATCAATTAATTTTGT<br>TTATTTG   |
| CYLD1  | cytogenetics | CCATCATGTCTGATTATTCAGATGCCTCGATTTGGAAAAGACTTTAA<br>ACT[A/G]TTTAAAAAATTTTTCTTCTCTGGAATTAATATAACAGAT<br>TACTTGA      |
| DBN1   | E278K        | GCTATCTCAGCTTGCCGGCCAGCCCCAACCTTTTCCTCGTGCCC<br>TCAG[G/A]AGGCAGCAGCTATTATTGCCAGCGGCCTGACAACCCA                     |

|      |             |                                                                                                                    |
|------|-------------|--------------------------------------------------------------------------------------------------------------------|
|      |             | AGGGAGTTCTTC                                                                                                       |
| DBN1 | E640Q       | CTAACGCCACAGAGATCGACATCACATGCTGGGATGCAGACCCAGT<br>TCCA[G/C]AAGAGGAGGAGGGCTTCGAGGGTGGTGATTAGCGGTG<br>GCGCCAGCCCTAG  |
| DBN1 | Splice Site | GCTATCTCAGCTTGCCTGGCCCAGCCCCAACCTTTTCCTCGTGCCC<br>TCAG[G/T]AGGCAGCAGCTATTATTGCCAGCGGCCTGACAACCCA<br>AGGGAGTTCTTC   |
| EGFR | S768I       | GCCACACTGACGTGCCTCTCCCTCCCTCCAGGAAGCCTACGTGAT<br>GGCCA[T/G]CGTGGACAACCCCCACGTGTGCCGCCTGCTGGGCATC<br>TGCCTCACCTCCA  |
| EGFR | A289V       | CACCACGTACCAGATGGATGTGAACCCCGAGGGCAAATACAGCTTT<br>GGTG[T/C]CACCTGCGTGAAGAAGTGTCCCCGTGAGTCTCTCTG<br>TGGGCCCTCTAA    |
| EGFR | C311S       | CTTCCCCAGGTAATTATGTGGTGACAGATCACGGCTCGTGCGTCCG<br>AGCC[A/T]GTGGGGCCGACAGCTATGAGATGGAGGAAGACGGCGT<br>CCGCAAGTGTAA   |
| EGFR | E709A       | TACACCCAGTGGAGAAGCTCCCAACCAAGCTCTCTTGAGGATCTTG<br>AAGG[A/C]AACTGAATTCAAAAAGATCAAAGTGTGGGCTCCGGTGC<br>GTTTCGGCACGG  |
| EGFR | E709K       | TTACACCCAGTGGAGAAGCTCCCAACCAAGCTCTCTTGAGGATCTT<br>GAAG[A/G]AACTGAATTCAAAAAGATCAAAGTGTGGGCTCCGGTG<br>CGTTTCGGCACG   |
| EGFR | G598V       | GTGTGCCCACTACATTGACGGCCCCCACTGCGTCAAGACCTGCCC<br>GGCAG[T/G]AGTCATGGGAGAAAACAACACCCTGGTCTGGAAGTAC<br>GCAGACGCCGGCC  |
| EGFR | G719A       | TCTCTTGAGGATCTTGAAGGAAACTGAATTCAAAAAGATCAAAGTGC<br>TGG[C/G]CTCCGGTGC GTTCGGCACGGTGTATAAGGTAAGGTCCCT<br>GGCACAGGCCT |
| EGFR | G719C       | CTCTCTTGAGGATCTTGAAGGAAACTGAATTCAAAAAGATCAAAGTG<br>CTG[T/G]GCTCCGGTGC GTTCGGCACGGTGTATAAGGTAAGGTCCC<br>TGGCACAGGCC |
| EGFR | G719D       | TCTCTTGAGGATCTTGAAGGAAACTGAATTCAAAAAGATCAAAGTGC<br>TGG[A/G]CTCCGGTGC GTTCGGCACGGTGTATAAGGTAAGGTCCCT<br>GGCACAGGCCT |
| EGFR | G719S       | CTCTCTTGAGGATCTTGAAGGAAACTGAATTCAAAAAGATCAAAGTG<br>CTG[A/G]GCTCCGGTGC GTTCGGCACGGTGTATAAGGTAAGGTCCC<br>TGGCACAGGCC |

|       |                  |                                                                                                                                                             |
|-------|------------------|-------------------------------------------------------------------------------------------------------------------------------------------------------------|
| EGFR  | H773R            | CTCTCCCTCCCTCCAGGAAGCCTACGTGATGGCCAGCGTGGACAA<br>CCCCC[A/G]CGTGTGCCGCCTGCTGGGCATCTGCCTCACCTCCACC<br>GTGCAGCTCATCA                                           |
| EGFR  | L858R            | GAACGTA CTGGT GAAAACACCGCAGCATGTCAAGATCACAGATTTT<br>GGGC[T/G]GCCAAACTGCTGGGTGCGGAAGAGAAAGAATACCATGC<br>AGAAGGAGGCAA                                         |
| EGFR  | L858R            | GGAACGTA CTGGT GAAAACACCGCAGCATGTCAAGATCACAGATTTT<br>TGGGC[T/G]GGCCAAACTGCTGGGTGCGGAAGAGAAAGAATACCAT<br>GCAGAAGGAGGC                                        |
| EGFR  | L861Q            | GGT GAAAACACCGCAGCATGTCAAGATCACAGATTTTGGGCTGGCC<br>AAAC[A/T]GCTGGGTGCGGAAGAGAAAGAATACCATGCAGAAGGAG<br>GCAAAGTAAGGA                                          |
| EGFR  | E746_A750<br>del | TGTCATAGGGACTCTGGATCCCAGAAGGTGAGAAAGTTAAAATTCC<br>CGTCGCTATCAAGG[/AATTAAGAGAAGCAA]CATCTCCGAAAGCCAA<br>CAAGGAAATCCTCGATGTGAGTTTCTGCTTTGCTGTGTGGGGTCC<br>ATG  |
| EGFR  | E746_A750<br>del | GACTCTGGATCCCAGAAGGTGAGAAAGTTAAAATTCCCGTCGCTAT<br>CAAG[/GAATTAAGAGAAGCA]ACATCTCCGAAAGCCAACAAGGAAAT<br>CCTCGATGTGAGTTTCTGCTTTGCTGTGTGGGGTCCATGGCTC           |
| EGFR  | L747_A750<br>>P  | TCTGGATCCCAGAAGGTGAGAAAGTTAAAATTCCCGTCGCTATCAA<br>GGAA[T/C]CAACATCTCCGAAAGCCAACAAGGAAATCCTCGATGTGA<br>GTTTCTGCTTTGCTGTGTGGGGTCCATGGC                        |
| EGFR  | L747_P753<br>>S  | TCTGTCATAGGGACTCTGGATCCCAGAAGGTGAGAAAGTTAAAATT<br>CCCGTCGCTATCAA[-<br>/GGAATTAAGAGAAGCAAC]ATCTCCGAAAGCCAACAAGGAAATCCT<br>CGATGTGAGTTTCTGCTTTGCTGTGTGGGGTCCA |
| EGFR  | R222C            | TTTGCTCTTTTTAGTGACCAAATCATCTGTGCCAGCAGTGCTCC<br>GGG[T/C]GCTGCCGTGGCAAGTCCCCAGTGACTGCTGCCACAACC<br>AGTGTGCTGCA                                               |
| EGFR  | R324L            | CGTCCGAGCCTGTGGGGCCGACAGCTATGAGATGGAGGAAGACG<br>GCGTCC[T/G]CAAGTGTAAGAAGTGCGAAGGGCCTTGCCGCAAAGG<br>TAGGAAGCCCGCCG                                           |
| EGFR  | T790M            | CGTGTGCCGCCTGCTGGGCATCTGCCTCACCTCCACCGTGCAGCT<br>CATCA[T/C]GCAGCTCATGCCCTTCGGCTGCCTCCTGGACTATGTCC<br>GGGAACACAAAG                                           |
| EPHB6 | R704Q            | GGCCCTGTGGGCCGGGGCGCCGAAAGCCTGCAGATGACCTTCC<br>TGGGCC[G/A]GGCCGAGTGCTGGGTGAGTTCCAGCACCCCAACAT<br>CCTGCGGCTGGAGG                                             |

|       |                      |                                                                                                                      |
|-------|----------------------|----------------------------------------------------------------------------------------------------------------------|
| EPHB6 | A588P                | CTTCCCAGCTTCCGGAAAGACTCTCCTTGGTGATCGGCTCCATCCT<br>GGGG[G/C]CTTTGGCCTTCCTCCTGCTGGCAGCCATCACCGTGCTG<br>GCGGTCGTCTTC    |
| EPHB6 | D345N                | CAGCAGCCCCGTTTGCCCCTGCCTGGAGGGCTTCTACCGGGCCA<br>GTTCC[G/A]ACCCACCAGAGGCCCCCTGCACTGGTGAGTTCCTCAC<br>CCAGCCCTGCAAT     |
| EPHB6 | D915G                | TGCATTTGACAAGATGATCCGCAAGCCAGATACCCTGCAGGCTGGC<br>GGGG[A/G]CCCAGGGGAAAGGTCTGGAGCTTGGGGCTAGAGCCTG<br>GAAAGCCAGGGA     |
| EPHB6 | E860K                | ACTTCCCATCATCATAGTCTTCCTCTGACCCCCAGGTAATAATGCA<br>ATA[G/A]AGCAGGAGTTCCGGCTGCCCCGCCTCCAGGCTGTCTC<br>CTGGATTACAT       |
| EPHB6 | P728S                | TCCAGCACCCCAACATCCTGCGGCTGGAGGGCGTGGTCACCAAGA<br>GCCGA[C/T]CCCTCATGGTGTGACGGAGTTCATGGAGCTTGGCC<br>CCTGGACAGCTTC      |
| ERBB2 | A775_G776i<br>nsYVMA | CTCCCATACCCTCTCAGCGTACCCTTGTCGCCAGGAAGCATAACGTG<br>ATGGcTN[a/g]GGTGTGGGCTCCCCATATGTCTCCCGCCTTCTGGGC<br>ATCTGCCTGACAT |
| ERBB2 | G776>VC              | CCCATACCCTCTCAGCGTACCCTTGTCGCCAGGAAGCATAACGTGAT<br>GGCTN[t/g]GTGTGGGCTCCCCATATGTCTCCCGCCTTCTGGGCATC<br>TGCCTGACATCC  |
| ERBB2 | M774_A775i<br>nsAYVM | GTCTCCCATACCCTCTCAGCGTACCCTTGTCGCCAGGAAGCATAACG<br>TGATgGCN[A/T]GGTGTGGGCTCCCCATATGTCTCCCGCCTTCTGGG<br>CATCTGCCTGAC  |
| ERBB2 | P780_Y781i<br>nsGSP  | AGCGTACCCTTGTCGCCAGGAAGCATAACGTGATGGCTGGTGTGGG<br>CTCCCc[A/G]NTATGTCTCCCGCCTTCTGGGCATCTGCCTGACATCC<br>ACGGTGCAGCTGG  |
| ERBB2 | cytogenetics         | CTCCCACCCCAAAGTACTAGCCCTCAATCCCTGACCCTGGCTTCCGCC<br>CCAG[C/T]CCTCTGACGTCCATCATCTCTGCGGTGGTTGGCATTCTG<br>CTGGTCGTGGT  |
| ERBB2 | cytogenetics         | CCTCCCAGGTGCCATCAAGTGGATGGCGCTGGAGTCCATTCTCC<br>GCCGG[C/A]GGTTCACCCACCAGAGTGATGTGTGGAGTTATGGTGT<br>GTGATGGGGGGTG     |
| ERBB2 | cytogenetics         | CCACGGTGACTGTGTGCATACCCCAAAGGTGACCTCTGTTTTTCTCC<br>TGTG[A/G]CCCTGTACCTTCCATGGAGTCCCATCCCAGATCCGTG<br>AGTGACCCCA      |
| ERBB4 | S303Y                | TCCCATTTTCTTCTACTTCCATCTTGGAACTAGGGCAGGCACGCACA<br>CAA[T/G]AACTGGAATCTACCACAAAGTTATCTGATTAATAAAAAAAAAA               |

|       |              |                                                                                                                    |
|-------|--------------|--------------------------------------------------------------------------------------------------------------------|
|       |              | AAAGGTAAA                                                                                                          |
| FASN  | ss3172972    | GCGGAACCGTCCGGTGTGTGCTGCTCTCCAACCTCAGCAGCACCT<br>CCCAC[A/G]TCCCGGAGGTGGACCCGGGCTCCGCAGAACTGCAGA<br>AGGTGTTGCA      |
| FBXW7 | 278*         | AACCAACACAAGTAAAACATATGATGCAAGTGATAGAACCCCAGTTT<br>CAA[C/T]GAGACTTCATTTATTGCTCCCTAAAGAGGTAAAGATTATC<br>AATTACATT   |
| FBXW7 | R465H        | AGAGACTGGAGAATGTATACACACCTTATATGGGCATACTTCCACT<br>GTGC[G/A]TTGTATGCATCTTCATGAAAAAAGGTAAGGGAAAAATCTT<br>GTCATGGTTGG |
| FBXW7 | S582L        | TTGGGATGTGGAGACAGGGAATTGCATTCACACGTTAACAGGGCAC<br>CAGT[C/T]GTTAACAAGTGGAAATGGAACCTCAAAGACAATATTCTTGT<br>TCTGGGAATG |
| FBXW7 | R465C        | CAGAGACTGGAGAATGTATACACACCTTATATGGGCATACTTCCACT<br>GTG[C/T]GTTGTATGCATCTTCATGAAAAAAGGTAAGGGAAAAATCTT<br>GTCATGGTTG |
| FBXW7 | R479Q        | TTTTGTTTTGTTTTCTGTTTCTCCCTCTGCAGAGTTGTTAGCGGTT<br>TC[G/A]AGATGCCACTCTTAGGGTTTGGGATATTGAGACAGGCCAGT<br>GTTTACATG    |
| FBXW7 | R505C        | TTGAGACAGGCCAGTGTTTACATGTTTTGATGGGTCATGTTGCAGC<br>AGTC[C/T]GCTGTGTTCAATATGATGGCAGGAGGGTTGTTAGTGGAG<br>CATATGATTTT  |
| FGFR3 | G697C        | TTGGGGTCCTGCTCTGGGAGATCTTCACGCTGGGGGGCTCCCCGT<br>ACCCC[T/G]GCATCCCTGTGGAGGAGCTCTCAAGCTGCTGAAGGA<br>GGCCACCGCATG    |
| FGFR3 | S371C        | CCCATGTCTTTGCAGCCGAGGAGGAGCTGGTGGAGGCTGACGAGG<br>CGGGC[A/T]GTGTGTATGCAGGCATCCTCAGCTACGGGGTGGGCTT<br>CTTCCTGTTTCATC |
| FGFR3 | Y373C        | CTTTGCAGCCGAGGAGGAGCTGGTGGAGGCTGACGAGGCGGGCA<br>GTGTGT[A/G]TGCAGGCATCCTCAGCTACGGGGTGGGCTTCTTCT<br>GTTTCATCCTGGTGG  |
| FGFR4 | P672T        | TGGAGGAGCTGTTCTCGCTGCTGCGGGAGGGACATCGGATGGACC<br>GACCC[A/C]CACACTGCCCCCAAGAGCTGTGAGGCCTCACCTGCC<br>CTCGACCCCACTT   |
| FHIT  | cytogenetics | AAGGACAAATGAGCCAAGTGTTCATGCCCAAGTCACTAGGTTAATA<br>AATG[C/G]TGGAGACACCAAATAACTGCCCTCTAACTCCAGGGAACA<br>TGCTCATAAC   |

|       |              |                                                                                                                    |
|-------|--------------|--------------------------------------------------------------------------------------------------------------------|
| FHIT  | cytogenetics | GATCCTCCCAGTGTTTGAATTTTAAAAAATAAAGGTCAGTTTATCACT<br>AG[A/C]GCGTTCAATTGGCTCCAGGGTTCATAGGGTATTGTTAGACT<br>AGAGCTCC   |
| FLT1  | L422I        | CTACCAGAACCAGAAGAAAGTATGAACAGCAAACCTACCATTGACA<br>ATTA[T/G]AGTGGCAGTGAGGTTTTTAAACACATTTGACTGTTTTATG<br>CTCAGCAAGA  |
| FLT3  | D835E        | GTCACCCACGGGAAAGTGGTGAAGATATGTGACTTTGGATTGGCTC<br>GAGA[A/T]ATCATGAGTGATTCCAACCTATGTTGTCAGGGGCAATGTG<br>AGGCTGCTATT |
| FLT3  | D835E        | GTCACCCACGGGAAAGTGGTGAAGATATGTGACTTTGGATTGGCTC<br>GAGA[T/G]ATCATGAGTGATTCCAACCTATGTTGTCAGGGGCAATGTG<br>AGGCTGCTATT |
| FLT3  | D835H        | TTGTCACCCACGGGAAAGTGGTGAAGATATGTGACTTTGGATTGGC<br>TCGA[C/G]ATATCATGAGTGATTCCAACCTATGTTGTCAGGGGCAATG<br>TGAGGCTGCTA |
| FLT3  | D835N        | TTGTCACCCACGGGAAAGTGGTGAAGATATGTGACTTTGGATTGGC<br>TCGA[A/G]ATATCATGAGTGATTCCAACCTATGTTGTCAGGGGCAATG<br>TGAGGCTGCTA |
| FLT3  | D835V        | TGTCACCCACGGGAAAGTGGTGAAGATATGTGACTTTGGATTGGCT<br>CGAG[A/T]ATCATGAGTGATTCCAACCTATGTTGTCAGGGGCAATGT<br>GAGGCTGCTAT  |
| FLT3  | D835Y        | TTGTCACCCACGGGAAAGTGGTGAAGATATGTGACTTTGGATTGGC<br>TCGA[T/G]ATATCATGAGTGATTCCAACCTATGTTGTCAGGGGCAATG<br>TGAGGCTGCTA |
| FLT3  | I836M        | ACCCACGGGAAAGTGGTGAAGATATGTGACTTTGGATTGGCTCGAG<br>ATAT[C/G]ATGAGTGATTCCAACCTATGTTGTCAGGGGCAATGTGAGG<br>CTGCTATTTCC |
| FOXL2 | C134W        | GAGGGCGGGCGGCGAGCGCAAGGGCAACTACTGGACGCTGGACCC<br>GGCCTG[C/G]GAAGACATGTTGAGAAAGGGCAACTACCGGCGCCG<br>CCGCCGCATGAAGAG |
| GAB1  | R498M        | TTTTTCCTCATTTGGAATGCAAGTTCCTCCTCCTGCTCATATGGGCT<br>TCA[G/T]GTCCAGCCCAAAAACCCCTCCAGAAGGCCAGTTCCTGTT<br>GCAGACTGTG   |
| GAB1  | T387N        | CAGTAGTTACTGTATCCCTACAGCAGGGATGTCGCCTTCACGTAGT<br>AATA[C/A]CATTTCCACTGTGGATTTAAACAAATTGCGAAAAGGTCAG<br>CTCTAGTTGA  |
| GAB1  | Y83C         | ACAAGTAGATGCTGGATTGACATTTAACAAAAAGAGTTTGAAAACA<br>GCT[A/G]CATTTTTGATATCAACACTATTGACCGGATTTTCTACTTGG                |



|        |          |                                                                                                                    |
|--------|----------|--------------------------------------------------------------------------------------------------------------------|
|        |          | TAGCAGACA                                                                                                          |
| GNA11  | Q209L    | TGGCTGAGTCCTGGCGCTGTGTCTTTTCAGGATGGTGGATGTGGG<br>GGGCC[A/T]GCGGTTCGGAGCGGAGGAAGTGGATCCACTGCTTTGA<br>GAACGTGACATCCA |
| GNA11  | R183C    | GCATCGCCACCTTGGGCTACCTGCCACCCAGCAGGACGTGCTGC<br>GGGTC[T/C]GCGTGCCACCACCGGCATCATCGAGTACCCTTTCGA<br>CCTGGAGAACATC    |
| GNA11  | Q209P    | TGGCTGAGTCCTGGCGCTGTGTCTTTTCAGGATGGTGGATGTGGG<br>GGGCC[A/C]GCGGTTCGGAGCGGAGGAAGTGGATCCACTGCTTTGA<br>GAACGTGACATCCA |
| GNA11  | Q209R    | TGGCTGAGTCCTGGCGCTGTGTCTTTTCAGGATGGTGGATGTGGG<br>GGGCC[A/G]GCGGTTCGGAGCGGAGGAAGTGGATCCACTGCTTTGA<br>GAACGTGACATCCA |
| GNA11  | R256W    | TCTGCCTTCGCTCCCGCCAGAACCGGATGGAGGAGAGCAAAGCCC<br>TGTT[C/T]GGACCATCATCACCTACCCCTGGTTCCAGAACTCCTCC<br>GTCATCCTCTTC   |
| GNAQ   | Q209R    | TTATTAATATGAGTATTGTTAACCTTGCAGAATGGTTCGATGTAGGGG<br>GCC[A/G]AAGGTCAGAGAGAAGAAAATGGATACACTGCTTTGAAAAT<br>GTCACCTCTA |
| GNAQ   | Q209L    | TTATTAATATGAGTATTGTTAACCTTGCAGAATGGTTCGATGTAGGGG<br>GCC[A/T]AAGGTCAGAGAGAAGAAAATGGATACACTGCTTTGAAAAT<br>GTCACCTCTA |
| GNAQ   | Q209P    | TTATTAATATGAGTATTGTTAACCTTGCAGAATGGTTCGATGTAGGGG<br>GCC[A/C]AAGGTCAGAGAGAAGAAAATGGATACACTGCTTTGAAAAT<br>GTCACCTCTA |
| GNAS   | Q227R    | GGAATAACCAGCTGTCCTCCTCCCCACCAGCATGTTTGACGTGGGT<br>GGCC[A/G]GCGCGATGAACGCCGCAAGTGGATCCAGTGCTTCAACG<br>GTAGGATGCTGT  |
| GNAS   | R201C    | TTTGGTGAGATCCATTGACCTCAATTTTGTTCAGGACCTGCTTCGC<br>TGC[C/T]GTGTCTGACTTCTGGAATCTTTGAGACCAAGTTCCAGGT<br>GGACAAAGTC    |
| GNAS   | R201H    | TTGGTGAGATCCATTGACCTCAATTTTGTTCAGGACCTGCTTCGCT<br>GCC[G/A]TGTCTGACTTCTGGAATCTTTGAGACCAAGTTCCAGGTG<br>GACAAAGTCA    |
| HIF1AN | Germline | GAAAGAAGCTACTGAGAAACCACTTT[G/T]TGATGTGTGCATTCAGC<br>TCGCAGGG                                                       |
| HRAS   | G12S     | CAGGCCCTGAGGAGCGATGACGGAATATAAGCTGGTGGTGGTGG<br>GCGCC[A/G]GCGGTGTGGGCAAGAGTGCCTGACCATCCAGCTGA                      |

|       |       |                                                                                                                    |
|-------|-------|--------------------------------------------------------------------------------------------------------------------|
|       |       | TCCAGAACCATTTT                                                                                                     |
| HRAS  | G12V  | AGGCCCTGAGGAGCGATGACGGAATATAAGCTGGTGGTGGTGGG<br>CGCCG[T/G]CGGTGTGGGCAAGAGTGCGCTGACCATCCAGCTGATC<br>CAGAACCATTTTG   |
| HRAS  | Q61H  | GTCATTGATGGGGAGACGTGCCTGTTGGACATCCTGGATACCGCC<br>GGCCA[T/G]GAGGAGTACAGCGCCATGCGGGACCAGTACATGCGC<br>ACCGGGGAGGGCTT  |
| HRAS  | Q61K  | TGGTCATTGATGGGGAGACGTGCCTGTTGGACATCCTGGATACCG<br>CCGGC[A/C]AGGAGGAGTACAGCGCCATGCGGGACCAGTACATGC<br>GCACCGGGGAGGGC  |
| HRAS  | Q61L  | GGTCATTGATGGGGAGACGTGCCTGTTGGACATCCTGGATACCGC<br>CGGCC[A/T]GGAGGAGTACAGCGCCATGCGGGACCAGTACATGCG<br>CACCGGGGAGGGCT  |
| HRAS  | Q61R  | GGTCATTGATGGGGAGACGTGCCTGTTGGACATCCTGGATACCGC<br>CGGCC[A/G]GGAGGAGTACAGCGCCATGCGGGACCAGTACATGCG<br>CACCGGGGAGGGCT  |
| IDH1  | R132H | AAATATCCCCGGCTTGTGAGTGGATGGGTAAAACCTATCATCATA<br>GGTC[G/A]TCATGCTTATGGGGATCAAGTAAGTCATGTTGGCAATAA<br>TGTGATTTTGC   |
| IDH2  | R172G | AAAACATCCCACGCCTAGTCCCTGGCTGGACCAAGCCCATCACCAT<br>TGGC[A/T]GGCACGCCCATGGCGACCAGGTAGGCCAGGGTGGAGA<br>GGGGATCCACTGA  |
| IDH2  | R172K | AAACATCCCACGCCTAGTCCCTGGCTGGACCAAGCCCATCACCATT<br>GGCA[G/A]GCACGCCCATGGCGACCAGGTAGGCCAGGGTGGAGAG<br>GGGATCCACTGAC  |
| IKBKB | A360S | ACACGGGCATCCCAGAGGAGGACCAGGAGCTGCTGCAGGAAGCG<br>GGCCTG[G/T]CGTTGATCCCCGATAAGCCTGCCACTCAGTGTATTT<br>AGACGGCAAGGTG   |
| IKBKB | Q611* | TGCTTCAGGCAATTCAGAGCTTCGAGAAGAAAGTGCGAGTGATCTA<br>TACG[C/T]AGCTCAGGTATGAGCCCCGACCTTCCTGCTCTGGAGGA<br>AGGACTGGGAGA  |
| IRS2  | G607D | CTCCTCTGCCTCGCTGGATGAATACACCCTGATGCGGGCCACCTTC<br>TCGG[G/A]CAGCGCGGGCCGCCTCTGCCCGTCTGCCCGCGCTCC<br>TCTCCCAAGGTGG   |
| IRS4  | A20V  | TTGCTCCTTCACTCGCGACCAAGCGACAAGAAGACTAAGAGGTGCA<br>GCAG[C/T]GGCGGCAGCGGCAGCTCTAGCAGCAGTGGTGACCACC<br>CCGCTTCTTTCT   |
| IRS4  | A972V | CTTTTCTAATTATGTGAATGTTGAGTTTGGAGTGCCATTTCCAAATC<br>CAG[C/T]AAACGACCTCTCAGATCTTTTAAGAGCTATACCACGTGCC<br>AACCCCTTATC |
| IRS4  | G557R | CAGGAGGAAACCAGTGCTCTAGAGATGGCCAGGGCACCGCAGGTG<br>GGCAC[G/C]GTTCCAGGTGGTGGCCAGAGACCTGGAGGTGGGCATG                   |

|      |       |                                                                                                             |
|------|-------|-------------------------------------------------------------------------------------------------------------|
|      |       | GCTCAGGTGGTGGC                                                                                              |
| JAK2 | V617F | TGATGAGCAAGCTTTCTCACAAGCATTGGTTTTAAATTATGGAGTATGT[T/G]TCTGTGGAGACGAGAGTAAGTAAACTACAGGCTTTCTAATGCCTTTCTC     |
| KIT  | N567K | CCCATGTATGAAGTACAGTGGAAAGTTGTTGAGGAGATAAATGGAAACAA[A/T]TATGTTTACATAGACCCAACACAACCTCCTTATGATCACA AATGGGAGTT  |
| KIT  | V559A | ATTTTTCCCTTTCTCCCCACAGAAACCCATGTATGAAGTACAGTGGAAAGG[T/C]TGTTGAGGAGATAAATGGAAACAATTATGTTTACATAGACC AACACAAC  |
| KIT  | V559G | ATTTTTCCCTTTCTCCCCACAGAAACCCATGTATGAAGTACAGTGGAAAGG[T/G]TGTTGAGGAGATAAATGGAAACAATTATGTTTACATAGACC AACACAAC  |
| KIT  | V559I | TATTTTTCCCTTTCTCCCCACAGAAACCCATGTATGAAGTACAGTGGAAAG[A/G]TTGTTGAGGAGATAAATGGAAACAATTATGTTTACATAGACC AACACAA  |
| KIT  | W557G | GTGATCTATTTTTCCCTTTCTCCCCACAGAAACCCATGTATGAAGTACAG[T/G]GGAAGTTGTTGAGGAGATAAATGGAAACAATTATGTTTACATAGACCCA    |
| KIT  | W557R | GTGATCTATTTTTCCCTTTCTCCCCACAGAAACCCATGTATGAAGTACAG[A/T]GGAAGTTGTTGAGGAGATAAATGGAAACAATTATGTTTACATAGACCCA    |
| KIT  | D816H | TCCTTACTCATGGTCGGATCACAAAGATTTGTGATTTTGGTCTAGCCAGA[C/G]ACATCAAGAATGATTCTAATTATGTGGTTAAAGGAAACGTGAGTACCCAT   |
| KIT  | D816V | CCTTACTCATGGTCGGATCACAAAGATTTGTGATTTTGGTCTAGCCAGAG[A/T]CATCAAGAATGATTCTAATTATGTGGTTAAAGGAAACGTGTACCCATT     |
| KIT  | D816Y | TCCTTACTCATGGTCGGATCACAAAGATTTGTGATTTTGGTCTAGCCAGA[T/G]ACATCAAGAATGATTCTAATTATGTGGTTAAAGGAAACGTGAGTACCCAT   |
| KIT  | L576P | TGTTGAGGAGATAAATGGAAACAATTATGTTTACATAGACCCAACACAAAC[T/C]TCCTTATGATCACAAATGGGAGTTCCCAGAAACAGGCTGAGTTTTGGTC   |
| KIT  | N822K | ACAAAGATTTGTGATTTTGGTCTAGCCAGAGACATCAAGAATGATTC TAA[T/G]TATGTGGTTAAAGGAAACGTGAGTACCCATTCTCTGCTTGA CAGTCCTGC |
| KIT  | N822K | ACAAAGATTTGTGATTTTGGTCTAGCCAGAGACATCAAGAATGATTC TAA[A/T]TATGTGGTTAAAGGAAACGTGAGTACCCATTCTCTGCTTGA CAGTCCTGC |
| KIT  | N822Y | TCACAAAGATTTGTGATTTTGGTCTAGCCAGAGACATCAAGAATGAT TCT[A/T]ATTATGTGGTTAAAGGAAACGTGAGTACCCATTCTCTGCTT           |

|        |                    |                                                                                                                     |
|--------|--------------------|---------------------------------------------------------------------------------------------------------------------|
|        |                    | GACAGTCCT                                                                                                           |
| KIT    | Y503_F504i<br>nsAY | GGCACGGTTGAATGTAAGGCTTACAACGATGTGGGCAAGACTTCTG<br>CCTA[T/T]TTTAACTTTGCATTTAAAGGTAACAACAAAGGTATATTTCTT<br>TTTAATCCA  |
| KIT    | V559D              | ATTTTTCCCTTTCTCCCCACAGAAACCCATGTATGAAGTACAGTGGAA<br>AGG[A/T]TGTTGAGGAGATAAATGGAAACAATTATGTTTACATAGACC<br>CAACACAAC  |
| KIT    | V560D              | TTTCCCTTTCTCCCCACAGAAACCCATGTATGAAGTACAGTGGAAAG<br>GTTG[A/T]TGAGGAGATAAATGGAAACAATTATGTTTACATAGACCCA<br>ACACAACCTTC |
| KIT    | V560G              | TTTCCCTTTCTCCCCACAGAAACCCATGTATGAAGTACAGTGGAAAG<br>GTTG[T/G]TGAGGAGATAAATGGAAACAATTATGTTTACATAGACCCA<br>ACACAACCTTC |
| KRAS   | G12V               | ATAAGGCCTGCTGAAAATGACTGAATATAAACTTGTGGTAGTTGGA<br>GCTG[T/G]TGGCGTAGGCAAGAGTGCCTTGACGATACAGCTAATTCA<br>GAATCATTTTG   |
| KRAS   | A146T              | AGGCTCAGGACTTAGCAAGAAGTTATGGAATTCCTTTTATTGAAACA<br>TCA[A/G]CAAAGACAAGACAGGTAAGTAACACTGAAATAAATACAGA<br>TCTGTTTTCT   |
| KRAS   | G12A               | ATAAGGCCTGCTGAAAATGACTGAATATAAACTTGTGGTAGTTGGA<br>GCTG[C/G]TGGCGTAGGCAAGAGTGCCTTGACGATACAGCTAATTC<br>AGAATCATTTTG   |
| KRAS   | G12C               | TATAAGGCCTGCTGAAAATGACTGAATATAAACTTGTGGTAGTTGGA<br>GCT[T/G]GTGGCGTAGGCAAGAGTGCCTTGACGATACAGCTAATTC<br>GAATCATTTT    |
| KRAS   | G12D               | ATAAGGCCTGCTGAAAATGACTGAATATAAACTTGTGGTAGTTGGA<br>GCTG[A/G]TGGCGTAGGCAAGAGTGCCTTGACGATACAGCTAATTC<br>AGAATCATTTTG   |
| KRAS   | G13D               | AGGCCTGCTGAAAATGACTGAATATAAACTTGTGGTAGTTGGAGCT<br>GGTG[A/G]CGTAGGCAAGAGTGCCTTGACGATACAGCTAATTCAGA<br>ATCATTTTGTGG   |
| KRAS   | Germline           | GTCTCGAACTCCTGACCTCAAGTGAT[G/T]CACCCACCTTGGCCTCA<br>TAAACCTG                                                        |
| KRAS   | KRAS               | TATAAGGCCTGCTGAAAATGACTGAATATAAACTTGTGGTAGTTGGA<br>GCT[C/G]GTGGCGTAGGCAAGAGTGCCTTGACGATACAGCTAATTC<br>AGAATCATTTT   |
| KRAS   | Q61H               | GTAATTGATGGAGAAACCTGTCTCTTGGATATTCTCGACACAGCAG<br>GTCA[A/C]GAGGAGTACAGTGCAATGAGGGACCAGTACATGAGGAC<br>TGGGGAGGGCTT   |
| MAP2K1 | L215P              | CAACTCCCGTGGGGAGATCAAGCTCTGTGACTTTGGGGTCAGCGG<br>GCAGC[T/C]CATCGACTCCATGGCCAACCTCCTTCGTGGGCACAAGG<br>TCCTACATGTCGG  |

|        |       |                                                                                                                    |
|--------|-------|--------------------------------------------------------------------------------------------------------------------|
| MAP2K1 | P124T | TCCGGAACCAGATCATAAGGGAGCTGCAGGTTCTGCATGAGTGCAA<br>CTCT[A/C]CGTACATCGTGGGCTTCTATGGTGC GTTCTACAGCGATG<br>GCGAGATCAGT |
| MAP2K1 | E120D | AAACCCGCAATCCGGAACCAGATCATAAGGGAGCTGCAGGTTCTG<br>CATGA[T/G]TGCAACTCTCCGTACATCGTGGGCTTCTATGGTGC GTT<br>CTACAGCGATGG |
| MAP2K1 | E120D | AAACCCGCAATCCGGAACCAGATCATAAGGGAGCTGCAGGTTCTG<br>CATGA[C/G]TGCAACTCTCCGTACATCGTGGGCTTCTATGGTGC GTT<br>CTACAGCGATGG |
| MAP2K1 | E368K | CGTTTCCTTACATGCAGGTTTCATGCTTTTATCAAGAGATCTGATGCT<br>GAG[A/G]AAGTGGATTTTGCAGGTTGGCTCTGCTCCACCATCGGCC<br>TTAACCAGCCC |
| MAP2K1 | F133L | AGGTTCTGCATGAGTGCAACTCTCCGTACATCGTGGGCTTCTATGG<br>TGCG[T/C]TCTACAGCGATGGCGAGATCAGTATCTGCATGGAGCAC<br>ATGGTATGTGAC  |
| MAP2K1 | F133L | GTTCTGCATGAGTGCAACTCTCCGTACATCGTGGGCTTCTATGGTG<br>CGTT[A/C]TACAGCGATGGCGAGATCAGTATCTGCATGGAGCACATG<br>GTATGTGACAC  |
| MAP2K1 | F133L | GTTCTGCATGAGTGCAACTCTCCGTACATCGTGGGCTTCTATGGTG<br>CGTT[C/G]TACAGCGATGGCGAGATCAGTATCTGCATGGAGCACAT<br>GGTATGTGACAC  |
| MAP2K1 | G128D | CATAAGGGAGCTGCAGGTTCTGCATGAGTGCAACTCTCCGTACATC<br>GTGG[A/G]CTTCTATGGTGC GTTCTACAGCGATGGCGAGATCAGTAT<br>CTGCATGGAGC |
| MAP2K1 | H119P | GATCAAACCCGCAATCCGGAACCAGATCATAAGGGAGCTGCAGGTT<br>CTGC[A/C]TGAGTGCAACTCTCCGTACATCGTGGGCTTCTATGGTGC<br>GTTCTACAGCG  |
| MAP2K1 | I111N | CTTTCTCCAGCTAATTCATCTGGAGATCAAACCCGCAATCCGGAAC<br>CAGA[A/T]CATAAGGGAGCTGCAGGTTCTGCATGAGTGCAACTCTCC<br>GTACATCGTGG  |
| MAP2K1 | I99T  | TCCCTCTTTCTTTTATAAAACCTCTCTTTCTTCCACCTTTCTCCAGCT<br>AA[T/C]TCATCTGGAGATCAAACCCGCAATCCGGAACCAGATCATAA<br>GGGAGCTGC  |
| MAP2K1 | K104N | AAAACCTCTCTTTCTTCCACCTTTCTCCAGCTAATTCATCTGGAGAT<br>CAA[A/C]CCCGCAATCCGGAACCAGATCATAAGGGAGCTGCAGGTT<br>CTGCATGAGTG  |
| MAP2K1 | K104N | AAAACCTCTCTTTCTTCCACCTTTCTCCAGCTAATTCATCTGGAGAT<br>CAA[A/T]CCCGCAATCCGGAACCAGATCATAAGGGAGCTGCAGGTT<br>CTGCATGAGTG  |
| MAP2K1 | L115P | AATTCATCTGGAGATCAAACCCGCAATCCGGAACCAGATCATAAGG<br>GAGC[T/C]GCAGGTTCTGCATGAGTGCAACTCTCCGTACATCGTGG<br>GCTTCTATGGTG  |

|        |       |                                                                                                                    |
|--------|-------|--------------------------------------------------------------------------------------------------------------------|
| MAP2K1 | P326L | AATTTTTGAGTTGTTGGATTACATAGTCAACGAGCCTCCTCCAAAAC<br>TGC[T/C]CAGTGGAGTGTTTCAGTCTGGAATTTCAAGATTTTGTGAATA<br>AATGCCTAA |
| MAP2K1 | Q56P  | GCTAGAGCTTGATGAGCAGCAGCGAAAGCGCCTTGAGGCCTTTCTT<br>ACCC[A/C]GAAGCAGAAGGTGGGAGAACTGAAGGATGACGACTTTG<br>AGAAGATCAGTG  |
| MAP2K1 | V211D | CAACATCCTAGTCAACTCCCGTGGGGAGATCAAGCTCTGTGACTTT<br>GGGG[A/T]CAGCGGGCAGCTCATCGACTCCATGGCCAACCTCTCG<br>TGGGCACAAGGT   |
| MAP2K2 | E124D | AAGCCGGCCATCCGGAACCAGATCATCCGCGAGCTGCAGGTCCTG<br>CACGA[A/T]TGCAACTCGCCGTACATCGTGGGCTTCTACGGGGCCT<br>TCTACAGTGACGG  |
| MAP2K2 | E124D | AAGCCGGCCATCCGGAACCAGATCATCCGCGAGCTGCAGGTCCTG<br>CACGA[A/C]TGCAACTCGCCGTACATCGTGGGCTTCTACGGGGCCT<br>TCTACAGTGACGG  |
| MAP2K2 | E376K | CTCCCCTTTCTTGCAGAACCACACCTTCATCAAGCGGTCCGAGGT<br>GGAA[A/G]AAGTGGATTTGCCGGCTGGTTGTGTA AACCTGCGG<br>CTGAACCAGCCC     |
| MAP2K2 | F137L | GTCCTGCACGAATGCAACTCGCCGTACATCGTGGGCTTCTACGGG<br>GCCTT[C/G]TACAGTGACGGGGAGATCAGCATTTCATGGAACACAT<br>GGACGGCGGCTC   |
| MAP2K2 | F137L | GTCCTGCACGAATGCAACTCGCCGTACATCGTGGGCTTCTACGGG<br>GCCTT[A/C]TACAGTGACGGGGAGATCAGCATTTCATGGAACACAT<br>GGTGAAGTGCCTC  |
| MAP2K2 | G132D | CATCCGCGAGCTGCAGGTCCTGCACGAATGCAACTCGCCGTACAT<br>CGTGG[A/G]CTTCTACGGGGCCTTCTACAGTGACGGGGAGATCAGC<br>ATTTGCATGGAAC  |
| MAP2K2 | G336R | CTGACCCACCCCTCTGTTCTCCTCCACAGCCACCTCCTAAGCTGCC<br>CAAC[C/G]GTGTGTTACCCCCGACTTCCAGGAGTTTGTCAATAAAT<br>GGTAGGTGGAG   |
| MAP2K2 | H123P | GATCAAGCCGGCCATCCGGAACCAGATCATCCGCGAGCTGCAGGT<br>CCTGC[A/C]CGAATGCAACTCGCCGTACATCGTGGGCTTCTACGGG<br>GCCTTCTACAGTG  |
| MAP2K2 | I103T | GTTTTCGGGACCCCCAAGCCAGTCTCGCCCTCTCCCCTTGCA<br>GCTGA[T/C]CCACCTTGAGATCAAGCCGGCCATCCGGAACCAGATC<br>ATCCGCGAGCTGC     |
| MAP2K2 | I115N | CCCCTTGACGCTGATCCACCTTGAGATCAAGCCGGCCATCCGGAA<br>CCAGA[A/T]CATCCGCGAGCTGCAGGTCCTGCACGAATGCAACTCG<br>CCGTACATCGTGG  |
| MAP2K2 | L119P | GATCCACCTTGAGATCAAGCCGGCCATCCGGAACCAGATCATCCG<br>CGAGC[T/C]GCAGGTCCTGCACGAATGCAACTCGCCGTACATCGTG<br>GGCTTCTACGGGG  |

|        |             |                                                                                                                     |
|--------|-------------|---------------------------------------------------------------------------------------------------------------------|
| MAP2K2 | P128T       | TCCGGAACCAGATCATCCGCGAGCTGCAGGTCCTGCACGAATGCA<br>ACTCG[A/C]CGTACATCGTGGGCTTCTACGGGGCCTTCTACAGTGA<br>CGGGGAGATCAGC   |
| MAP2K2 | Q60P        | GCTGGAACCTTGACGAGCAGCAGAAGAAGCGGCTGGAAGCCTTTCT<br>CACCC[A/C]GAAAGCCAAGGTGCGGCGAACTCAAAGACGATGACTTC<br>GAAAGGATCTCAG |
| MAP2K7 | R162H       | CCTGCCTGTGCAGCAAATGCGGGCGCTCCGGGAACAAGGAGGAGAA<br>CAAGC[G/A]CATCCTCATGGACCTGGATGTGGTGCTGAAGAGCCAC<br>GACTGCCCTACA   |
| MAP2K7 | Splice Site | CTAGCCTTACTAAAGATCACAGGAAGAGACCAAAGTATAATAAGCTA<br>CTT[G/A]TGAGTACCTGAGCCCTCCAGTCCCGTCTGTCCCTGC<br>GGAGGCGCGAG      |
| MAP2K7 | Splice Site | TCGGAGGGAGGAGAACATAAACCTGTCCAGCCCTGCCCGTCTCCC<br>TCCA[G/A]GTGGAGCTGGCAACAGGACAGTTTCCCTACAAGAACT<br>GCAAGACGGACTT    |
| MAP2K7 | R162C       | CCCTGCCTGTGCAGCAAATGCGGGCGCTCCGGGAACAAGGAGGAGA<br>ACAAG[C/T]GCATCCTCATGGACCTGGATGTGGTGCTGAAGAGCCA<br>CGACTGCCCTAC   |
| MET    | R988C       | AACAAGCTCTTTCTTTCTCTCTGTTTTAAGATCTGGGCAGTGAATTA<br>GTT[T/C]GCTACGATGCAAGAGTACACACTCCTCATTTGGATAGGCT<br>TGTAAGTGCC   |
| MET    | E168D       | GCTGACATACAGTCGGAGGTTCACTGCATATTCTCCCCACAGATAG<br>AAGA[T/G]CCCAGCCAGTGTCTGACTGTGTGGTGAGCGCCCTGGG<br>AGCCAAAGTCCT    |
| MET    | L229F       | TCGATATCAGTGAGAAGGCTAAAGGAAACGAAAGATGGTTTTATGTT<br>TTT[T/G]ACGGACCAGTCCTACATTGATGTTTTACCTGAGTTCAGAGA<br>TTCTTACCC   |
| MET    | M1268T      | ATACTATAGTGTACACAACAAAACAGGTGCAAAGCTGCCAGTGAAG<br>TGGA[T/C]GGCTTTGGAAAGTCTGCAAACCTCAAAGTTTACCACCAA<br>GTCAGATGTGG   |
| MET    | T1010I      | ACACACTCCTCATTTGGATAGGCTTGTAAGTGCCCCGAAGTGTAAGC<br>CCAA[T/C]TACAGAAATGTTTTCAAATGAATCTGTAGACTACCGAGCT<br>ACTTTTCCAG  |
| MET    | Y1248C      | TGAAAAATTCACAGTCAAGGTTGCTGATTTTGGTCTTGCCAGAGACA<br>TGT[A/G]TGATAAAGAATACTATAGTGTACACAACAAAACAGGTGCAA<br>AGCTGCCAG   |
| MET    | Y1253D      | TCAAGGTTGCTGATTTTGGTCTTGCCAGAGACATGTATGATAAAGAA<br>TAC[T/G]ATAGTGTACACAACAAAACAGGTGCAAAGCTGCCAGTGAA<br>GTGGATGGCT   |
| MLL3   | C347G       | TCATTGTTTTCACTGTTAATTATAGCGAAGGAAGATGCAAACCTGTGCA<br>GTG[T/G]GCGACAGCCCGGGAGACCTCTTAGATCAGTTCTTTTGTAC<br>TACTTGTGGT |

|      |              |                                                                                                                      |
|------|--------------|----------------------------------------------------------------------------------------------------------------------|
| MLL3 | D400N        | AAAGATAAGGCATCATTAAATGCTATCTTATTTTTTAGACAATCGGGA<br>GAA[G/A]ATAGCAAGATGCTAGTGTGTGATACGTGTGACAAAGGGTA<br>TCATACTTTT   |
| MLL3 | E3775*       | GTCCTCCCCATTCTGCTGGGGCCCCTGCTGCCAAAGGAGACTCAG<br>GGAAT[G/A]AACTTCTGAAACACTTGTTGAAAAATAAAAAGTCATCTT<br>CTCTTTTGAAT    |
| MLL3 | G1517R       | CTAGTCTTTTAATCTTGTTACTATTATTGTTTTATCTCCTAGAGCTTG<br>GC[G/A]GAAAAGATGTTGAAGACTTATTTACAGCTGTACTTAGTCCT<br>GCGAACACT    |
| MLL3 | G4445D       | CCACTTGAAGTGCCTCTGTGGTCCACGGAGGTCTATGAGACTCAG<br>GCTG[G/A]TGCCTTAATAAATGTGGAGCTAGCTCTGAGGAGAGGCC<br>TACAAATGAAAT     |
| MLL3 | L478W        | ACAGCAGGATAACTTATGTCCCTTCTGTGGGAAGTGTTATCATCCA<br>GAAT[T/G]GCAGAAAGACATGCTTCATTGTAATATGTGCAAAAGGTA<br>AGAAGATAGTT    |
| MLL3 | R1906*       | CACGACCACCATCTCCAATGGATCCATATGCAAAAATGGTTGGTAC<br>CCCT[C/T]GACCACCTCCTGTGGGCCATAGTTTTTCCAGAAGAAATT<br>CTGCTGCACCA    |
| MLL3 | T3698S       | AGAACAAGTGCCTCAATAGTGATTTCTCACAAGCAACTCCAAATCAA<br>CAG[A/T]CGTATGCAAATTCAGAAAGTAGACAAGCTCTCCATGGAAAC<br>CCCTGCCAAA   |
| MSH6 | P1087fs*3    | GATGGTCCTATGTGTGCGCCAGTAATTCTGTTGCCGGAAGATACCC<br>CCCC[C/T]TTCTTAGAGCTTAAAGGATCACGCCATCCTTGCAATTACGA<br>AGACTTTTTT   |
| MSH6 | P1087fs*5    | GATGGTCCTATGTGTGCGCCAGTAATTCTGTTGCCGGAAGATACCC<br>CCCC[C/T]CTTCTTAGAGCTTAAAGGATCACGCCATCCTTGCAATTACG<br>AAGACTTTTTTT |
| MYC  | cytogenetics | TCCACGAACTTTGCCATAGCAGCGGGCGGGCACTTTGCACTGG<br>AACTT[A/T]CAACACCCGAGCAAGGACGCGACTCTCCCGACGCGGG<br>GAGGCTATTCTGC      |
| MYC  | cytogenetics | AAAGGGGGTGAAAGGGTGCTCCCTTTATTCCCCACCAAGACCACC<br>CAGC[C/A]GCTTTAGGGGATAGCTCTGCAAGGGGAGAGGTTTCGGGA<br>CTGTGGCGCGCA    |
| MYC  | cytogenetics | ATTTTTCATTTCCAGTAAATAGGGAGTTGCTAAAGTCATACCAAGC<br>AAT[T/A]TGCAGCTATCATTTGCAACACCTGAAGTGTCTTGGTAAAG<br>TCCCTCAA       |
| MYC  | cytogenetics | ACTGGTCCTCAAGAGGTGCCACGTCTCCACACATCAGCACAACACTAC<br>GCAG[C/T]GCCTCCCTCCACTCGGAAGGACTATCCTGCTGCCAAGA<br>GGTCAAGTTGG   |
| MYC  | cytogenetics | GTTTCAAATGCATGATCAAATGCAACCTCACAACCTTGGCTGAGTCT<br>TGA[G/T]ACTGAAAGATTTAGCCATAATGTAAACTGCCTCAAATTGGA<br>CTTTGGGCA    |



|       |              |                                                                                                                     |
|-------|--------------|---------------------------------------------------------------------------------------------------------------------|
| MYC   | cytogenetics | ATGGGAGTTTATTTCATAACGCGCTCTCCAAGTATACGTGGCAATGC<br>GTTG[T/C]TGGGTTATTTAATCATTCTAGGCATCGTTTTCTCCTTAT<br>GCCTCTATC    |
| MYC   | cytogenetics | CTGGGTTATTTAATCATTCTAGGCATCGTTTTCTCCTTATGCCTCT<br>AT[A/C]ATTCTCCCTATCTACACTAACATCCCACGCTCTGAACGCG<br>CGCCATTA       |
| NEK10 | E379K        | CTGCAGGCCGAATCCAGCAGCTTCATTTATCAGAAGACTTGAGCCC<br>TAGG[G/A]AAATACAAGAAAATACTTTCTCACTCAAGCAGGTATTTA<br>TGTTTTATTA    |
| NEK10 | A66V         | CTTCGATAGTGCCCAAATAGCATGACGAAGTCTGAGCCCGCCATC<br>AGGG[C/T]GGGTGGACACAGAGCTCGGGGTCAGTGGCATGAATCCA<br>CAGAAGCTGTTG    |
| NEK10 | I783V        | TCACTCCTGATGCGGAAGCTCGTCCAGATATTGTAGAAGTCAGTTC<br>GATG[A/G]TATCAGATGTCATGATGAAATATTTAGACAACCTTATCTAC<br>ATCCCAGTTG  |
| NEK10 | P1115L       | ACTATAGAGAATTCTTTCCACTTCTGAATCTTATAGGTATCATTCTA<br>TC[C/T]ATGGGGGACCAAGAATCACCCAACCAAAGATGAAAATGCT<br>GCATTTTGA     |
| NEK10 | R878M        | AGACCTGCCCCCTGAAGGCTTCCAGGCCTCCTATGGTAAAGACGAA<br>GACA[G/T]GGCCTGTGACGAAATCCTGTCTAGATGATAACTTCAACCT<br>GGAAAATGCTG  |
| NF1   | D176E        | AGGTTACAGGAATTAAGTGTGTTGTTTTCAGAAAGACAATGTTGATGTTCA<br>TGA[A/T]ATAGAATTGTTACAGTATATCAATGTGGATTGTGCAAAT<br>AAAACGACT |
| NF1   | A74D         | CTAACTTTTATGTTCTGAATATCTTTTCTGTTAGAGAATATTTGGAGA<br>AG[A/C]TGCTGAAAAAATTTATATCTCTCTCAGTTGATTATATTGGAT<br>ACACTGG    |
| NF1   | K1444E       | TAGATAAAAAGCCACCACCTAGAATCGAAAGGGGCTTGAAGTTAAT<br>GTCA[A/G]AGGTGAATTATTTTGATAATCTAGCTATCTTAAATCCCC<br>TTCCAACATA    |
| NF1   | P2477S       | CACTTCTTCTTACTGATATTTCAATGGAAAATGTTTCTATGGATACAT<br>AT[T/C]CCATTCATCATGGTGACCCTTCTATAGGTAAGTGGATTTAC<br>TCTCCTAT    |
| NF1   | P678fs*10    | TTCCACCCTTGACTCTCAGGATAGTGCAGCAGGATGCAGCGGAACC<br>CCCC[C]GATTTGCCGACAAGCCCAGACCAAAGTGAAGTGGCCCT<br>GTACATGTTTC      |
| NF1   | R1276Q       | CATGTTTTCTAAAGAAGTAGAATTGGCAGACTCCATGCAGACTCTCT<br>TCC[A/G]AGGCAACAGCTTGGCCAGTAAATAATGACATTCTGTTTC<br>AAGTTTTGTA    |
| NF1   | Y1607fs*17   | TTAAGTATTTTCTACCAAGCTGGGACTTCAAAGCTGGGAATCCTAT<br>TTTT[T]ATTATGTTGCACGGAGGTAAGAAATACTATGTTTTGGGTCT<br>CTTAACAG      |

|        |             |                                                                                                                    |
|--------|-------------|--------------------------------------------------------------------------------------------------------------------|
| NFKB1  | Splice Site | TATAATATAGGAAAAATAATGATTGAAACATTTAAATGTTCTTCTTTA<br>CA[G/A]ATGTTTCATTTGGATCCTTCTTTGACTCATACAATATTTAATC<br>CAGAAGT  |
| NFKBIA | R143fs*11   | TTGCTGAGGCACTTCTGGGAGCTGGCTGTGATCCTGAGCTCCGAG<br>ACTTT[C]CGAGGAAATACCCCCCTACACCTTGCCTGTGAGCAGGG<br>CTGCCTGGCCAGCG  |
| NFKBIE | D462E       | GGCCGGGGTCTCATGGGCATCTCATCCACTCTGTGCAAGGCGGGT<br>GCTGA[C/A]TCCCTGCTGCGGAATGTGGAGGATGAGACGCCCCAGG<br>ACCTGACTGAGGA  |
| NFKBIE | Q380X       | CTCACTCTACCCCATCCCAGGTCTGGCTTGTCTCCACATTGCCAC<br>CCTT[C/T]AGAAGAACCAACCACTCATGGAATTGCTGCTTCGGAATG<br>GAGCTGACATT   |
| NRAS   | G12D        | TTCTTGCTGGTGTGAAATGACTGAGTACAACTGGTGGTGGTTGGA<br>GCAG[A/G]TGGTGTGGGAAAAGCGCACTGACAATCCAGCTAATCC<br>AGAACCCTTTG     |
| NRAS   | Q61H        | GTTATAGATGGTGAAACCTGTTTGTGGACATACTGGATACAGCTG<br>GACA[A/T]GAAGAGTACAGTGCCATGAGAGACCAATACATGAGGACA<br>GGCGAAGGCTT   |
| NRAS   | Q61K        | TGGTTATAGATGGTGAAACCTGTTTGTGGACATACTGGATACAGCT<br>GGA[A/C]AAGAAGAGTACAGTGCCATGAGAGACCAATACATGAGGA<br>CAGGCGAAGGC   |
| NRAS   | Q61L        | GGTTATAGATGGTGAAACCTGTTTGTGGACATACTGGATACAGCT<br>GGAC[A/T]AGAAGAGTACAGTGCCATGAGAGACCAATACATGAGGA<br>CAGGCGAAGGCT   |
| NRAS   | Q61R        | GGTTATAGATGGTGAAACCTGTTTGTGGACATACTGGATACAGCT<br>GGAC[A/G]AGAAGAGTACAGTGCCATGAGAGACCAATACATGAGGA<br>CAGGCGAAGGCT   |
| NRAS   | G12S        | GTTCTTGCTGGTGTGAAATGACTGAGTACAACTGGTGGTGGTTGG<br>AGCA[A/G]GTGGTGTGGGAAAAGCGCACTGACAATCCAGCTAATC<br>CAGAACCCTTG     |
| NRAS   | G13D        | TTGCTGGTGTGAAATGACTGAGTACAACTGGTGGTGGTTGGAGCA<br>GGTG[A/G]TGTGGGAAAAGCGCACTGACAATCCAGCTAATCCAGA<br>ACCACTTTGTAG    |
| PDGFRA | D842V       | CCTGGCACAAGGAAAAATTGTGAAGATCTGTGACTTTGGCCTGGCC<br>AGAG[A/T]CATCATGCATGATTCGAACATATGTGTCGAAAGGCAGTGT<br>ACGTCCTCACT |
| PDGFRA | V561D       | TACCTGTCCTGGTCATTTATAGAAACCGAGGTATGAAATTCGCTGGA<br>GGG[A/T]CATTGAATCAATCAGCCCAGATGGACATGAATATATTTATG<br>TGGACCCGA  |
| PIK3CA | P6539R      | ATTAAGGGAAAATGACAAAGAACAGCTCAAAGCAATTTCTACACGA<br>GATC[C/G]TCTCTCTGAAATCACTGAGCAGGAGAAAAGATTTTCTATG<br>GAGTCACAGGT |

|        |        |                                                                                                                    |
|--------|--------|--------------------------------------------------------------------------------------------------------------------|
| PIK3CA | C378R  | ACCATGGAGGAGAACCCTTATGTGACAATGTGAACACTCAAAGAGT<br>ACCT[T/C]GTTCCAATCCCAGGTAAGGAAGTATATAGATTTATATTTCC<br>CAAAGTTAT  |
| PIK3CA | C420R  | GTTTTATAATTTAGACTAGTGAATATTTTTCTTTGTTTTTAAGGAACA<br>C[T/C]GTCCATTGGCATGGGGAAATATAAACTTGTTTGATTACACAGA<br>CACTCTA   |
| PIK3CA | E542K  | AAAATGACAAAGAACAGCTCAAAGCAATTTCTACACGAGATCCTCTC<br>TCT[A/G]AAATCACTGAGCAGGAGAAAGATTTTCTATGGAGTCACAG<br>GTAAGTGCTA  |
| PIK3CA | E545A  | AGAACAGCTCAAAGCAATTTCTACACGAGATCCTCTCTCTGAAATCA<br>CTG[A/C]GCAGGAGAAAGATTTTCTATGGAGTCACAGGTAAGTGCTA<br>AAATGGAGAT  |
| PIK3CA | E545G  | AGAACAGCTCAAAGCAATTTCTACACGAGATCCTCTCTCTGAAATCA<br>CTG[A/G]GCAGGAGAAAGATTTTCTATGGAGTCACAGGTAAGTGCTA<br>AAATGGAGAT  |
| PIK3CA | E545K  | AAGAACAGCTCAAAGCAATTTCTACACGAGATCCTCTCTCTGAAATC<br>ACT[A/G]AGCAGGAGAAAGATTTTCTATGGAGTCACAGGTAAGTGCT<br>AAAATGGAGA  |
| PIK3CA | G118D  | AATTGAACCAGTAGGCAACCGTGAAGAAAAGATCCTCAATCGAGAA<br>ATTG[A/G]TATGATACAATATCCTATTCTAAAATGCAAATAACCATAAA<br>GCTTAACTG  |
| PIK3CA | H1047L | AACTGAGCAAGAGGCTTTGGAGTATTTTCATGAAACAAATGAATGATG<br>CAC[A/T]TCATGGTGGCTGGACAACAAAAATGGATTGGATCTTCCAC<br>ACAATTAAC  |
| PIK3CA | H1047R | AACTGAGCAAGAGGCTTTGGAGTATTTTCATGAAACAAATGAATGATG<br>CAC[A/G]TCATGGTGGCTGGACAACAAAAATGGATTGGATCTTCCAC<br>ACAATTAAC  |
| PIK3CA | H1047Y | AACTGAGCAAGAGGCTTTGGAGTATTTTCATGAAACAAATGAATGAT<br>GCA[T/C]ATCATGGTGGCTGGACAACAAAAATGGATTGGATCTTCCA<br>CACAAATTAAC |
| PIK3CA | M1043I | GCCTTAGATAAAAAGTGAAGAGGCTTTGGAGTATTTTCATGAAACA<br>AAT[T/G]AATGATGCACATCATGGTGGCTGGACAACAAAAATGGATT<br>GGATCTTCCA   |
| PIK3CA | M1043I | GCCTTAGATAAAAAGTGAAGAGGCTTTGGAGTATTTTCATGAAACA<br>AAT[G/T]AATGATGCACATCATGGTGGCTGGACAACAAAAATGGATT<br>GGATCTTCCA   |
| PIK3CA | M1043T | AGCCTTAGATAAAAAGTGAAGAGGCTTTGGAGTATTTTCATGAAAC<br>AAA[T/C]GAATGATGCACATCATGGTGGCTGGACAACAAAAATGGAT<br>TGGATCTTCC   |
| PIK3CA | E545G  | AGAACAGCTCAAAGCAATTTCTACACGAGATCCTCTCTCTGAAATCA<br>CTG[A/G]GCAGGAGAAAGATTTTCTATGGAGTCACAGGTAAGTGCTA<br>AAATGGAGAT  |

|        |        |                                                                                                                                     |
|--------|--------|-------------------------------------------------------------------------------------------------------------------------------------|
| PIK3CA | H1047R | AACTGAGCAAGAGGCTTTGGAGTATTTTCATGAAACAAATGAATGATG<br>CAC[A/G]TCATGGTGGCTGGACAACAAAATGGATTGGATCTTCCAC<br>ACAATTAAC                    |
| PIK3CA | Q546K  | AACAGCTCAAAGCAATTTCTACACGAGATCCTCTCTCTGAAATCACT<br>GAG[A/C]AGGAGAAAGATTTTCTATGGAGTCACAGGTAAGTGCTAAA<br>ATGGAGATTC                   |
| PIK3CA | Q75E   | TCCATCAACTTCTTCAAGATGAATCTTCTTACATTTTCGTAAGTGTTA<br>CT[C/G]AAGAAGCAGAAAGGGAAGAATTTTTTGATGAAACAAGACGA<br>CTTTGTGAC                   |
| PIK3CA | R108H  | CCTTCGGCTTTTTCAACCCTTTTTAAAAGTAATTGAACCAGTAGGCA<br>ACC[A/G]TGAAGAAAAGATCCTCAATCGAGAAATTGGTATGATACAA<br>TATCCTATTC                   |
| PIK3CA | R38G   | TAGTAGAATGTTTACTACCAAATGGAATGATAGTGACTTTAGAATGC<br>CTC[C/G]GTGAGGCTACATTAATAACCATAAAGCATGAACTATTTAAA<br>GAAGCAAGA                   |
| PIK3CA | T1025A | CTGGAATGCCAGAACTACAATCTTTTGATGACATTGCATACATTCGA<br>AAG[A/G]CCCTAGCCTTAGATAAACTGAGCAAGAGGCTTTGGAGTA<br>TTTCATGAAA                    |
| PIK3R1 | 449L>S | TAGGATCAAGTTGTCAAAGAAGATAATATTGAAGCTGTAGGGAAAAA<br>AT[T/C]ACATGAATATAACACTCAGTTTCAAGAAAAAAGTCGAGAATA<br>TGATAGA                     |
| PIK3R1 | 527N>K | CGTTCCTGATGTACCCAGATAATAACAAATACGTTTCTTTGCCTGC<br>AGGATTATGCATAA[T/G]TATGATAAGTTGAAGTCTCGAATCAGTGAA<br>ATTATTGACAGTAGAAGAAGATTGGAAG |
| PIK3R1 | 666E>K | TGGACAAGCTCAAAGACAGTTTTTCTTCTCTCTCTAGGGTGGG<br>CGGC[G/A]AAGTAAAGCATTGTGTCATAAACAAAACAGCAACTGGCT<br>ATGGCT                           |
| PIK3R1 | indel  | GTTGTCAAAGAAGATAATATTGAAGCTGTAGGGAAAAAATTACATGA<br>ATATAA[TAA]CACTCAGTTTCAAGAAAAAAGTCGAGAATATGATAGA<br>TTATATGAAGAAT                |
| PIK3R1 | 162R>* | CTGGAATGTTCAACTCTATACAGAACACAGAGCTCCAGCAACCTGG<br>CAGAATTA[C/T]GACAGCTTCTTGATTGTGGTGAGTGTACAGAGCT<br>AGAAATGCAAATGGGA               |
| PIK3R1 | 285N>H | AAAAGGTTTCTAATAAACTCTTTTCTTACAGCTCTGATAAATACTGAA<br>[A/C]ACCTCATAAAAGTTATAGAAATTTAATCTCAACTGAATGGAAT<br>GAACGACAGCCTG               |
| PIK3R1 | 348R>* | GATGAGCATTGTTTTGTGTTTTCAATTCAGGGAAGAAGTGAATGAAA<br>AACTT[C/T]GAGATACAGCAGACGGGACCTTTTTGGTACGAGATGCG<br>TCTACTAAAATGC                |
| PIK3R1 | 543R>I | GCATAATTATGATAAGTTGAAGTCTCGAATCAGTGAATTATTGACA<br>GTAGAA[G/T]AAGATTGGAAGAAGACTTGAAGAAGCAGGCAGCTGA                                   |

|        |                  |                                                                                                                                                 |
|--------|------------------|-------------------------------------------------------------------------------------------------------------------------------------------------|
|        |                  | GTATCGAGAAATTGACAAAC                                                                                                                            |
| PIK3R1 | 564N>D           | AGACTTGAAGAAGCAGGCAGCTGAGTATCGAGAAATTGACAAACGT<br>ATG[A/G]ACAGCATTAAACCAGACCTTATCCAGCTGAGAAAGACGAG<br>AGACCAATACTTGATGTAAGTATTTG                |
| PIK3R1 | 574R>I           | GAGTATCGAGAAATTGACAAACGTATGAACAGCATTAAACCAGACC<br>TTATCCAGCTGA[G/T]AAAGACGAGAGACCAATACTTGATGTAAGTA<br>TTTCAAATGGAATCCTA                         |
| PIK3R1 | 642R>*           | GAATGTTGGAAGCAGCAACCGAAACAAAGCTGAAAACCTGTTGCGA<br>GGGAAG[C/T]GAGATGGCACTTTTCTTGCCGGGAGAGCAGTAAAC<br>AGGGCTGCT                                   |
| PIK3R1 | 649R>Q           | CAGCAACCGAAACAAAGCTGAAAACCTGTTGCGAGGGAAGCGAGA<br>TGGCACTTTTCTTGCC[G/A]GGAGAGCAGTAAACAGGGCTGCTATG<br>CCTGCTCTGTAGTGTATG                          |
| PIK3R1 | 682A>V           | CGAAGTAAAGCATTGTGTCATAAACAAAACAGCAACTGGCTATGGC<br>TTTG[C/T]CGAGCCCTATAACTTGTACAGCTCTCTGAAAGAAGTGGT<br>GCTACATTAC                                |
| PIK3R1 | D464H            | AAAAATTACATGAATATAACACTCAGTTTCAAGAAAAAAGTCGAGAA<br>TAT[G/C]ATAGATTATATGAAGAATATACCCGCACATCCCAGGTGAG<br>TTTTCTATGA                               |
| PIK3R1 | D560_S565<br>del | GACAGTAGAAGAAGATTGGAAGAAGACTTGAAGAAGCAGGCAGCT<br>GAGTATCGAGAAAT[/TGACAAACGTATGAACAG]CATTAAACCAGAC<br>CTTATCCAGCTGAGAAAGACGAGAGACCAATACTTGATGTAA |
| PIK3R1 | D560Y            | GAAGATTGGAAGAAGACTTGAAGAAGCAGGCAGCTGAGTATCGAG<br>AAATT[G/T]ACAAACGTATGAACAGCATTAAACCAGACCTTATCCAGC<br>TGAGAAAGACG                               |
| PIK3R1 | G376R            | ATTCCAAAATGTTAATACCTTTATTTTTATATTGTTTTTACAGGAAAG<br>GG[G/A]GAAATAACAAATTAATCAAAATATTTTCATCGAGATGGGAAAT<br>ATGGCTTC                              |
| PIK3R1 | H450_E451<br>del | AGGATCAAGTTGTCAAAGAAGATAATATTGAAGCTGTAGGGAAAAAA<br>TTA[/CATGAA]TATAACACTCAGTTTCAAGAAAAAAGTCGAGAATATG<br>ATAGATTATATGA                           |
| PIK3R1 | K459_S460<br>>N  | GAAGCTGTAGGGAAAAAATTACATGAATATAACACTCAGTTTCAAGA<br>AAA[/AAG]TCGAGAATATGATAGATTATATGAAGAATATACCCGCACA<br>TCCCAGGTGA                              |
| PIK3R1 | K459E            | TTGAAGCTGTAGGGAAAAAATTACATGAATATAACACTCAGTTTCAA<br>GAA[A/G]AAAGTCGAGAATATGATAGATTATATGAAGAATATACCCG<br>CACATCCCAG                               |

|        |                   |                                                                                                                                                                       |
|--------|-------------------|-----------------------------------------------------------------------------------------------------------------------------------------------------------------------|
| PIK3R1 | L570P             | AGCTGAGTATCGAGAAATTGACAAACGTATGAACAGCATTAAACCA<br>GACC[T/C]TATCCAGCTGAGAAAGACGAGAGACCAATACTTGATGTA<br>AGTATTTGAAA                                                     |
| PIK3R1 | N453_T454i<br>nsN | TGTCAAAGAAGATAATATTGAAGCTGTAGGGAAAAAATTACATGAAT<br>ATA[/TAA]JACACTCAGTTTTCAAGAAAAAAGTCGAGAATATGATAGATT<br>ATATGAAGAATA                                                |
| PIK3R1 | N564K             | GACTTGAAGAAGCAGGCAGCTGAGTATCGAGAAATTGACAAACGTA<br>TGAA[C/G]AGCATTAAACCAGACCTTATCCAGCTGAGAAAGACGAGA<br>GACCAATACTT                                                     |
| PIK3R2 | 345R>Q            | CCAAGGAGGTGTCACAGGGTGAGCGGGGTCTCCAGGTGGCTCGG<br>CAGTCCCAATGTTGGATGTTCCACAGGGAGGAGGTGAACGAGAA<br>ACTCC[G/A]GGACACTCCCGATGGCACCTTCCTAGTCCGAGATGCTT<br>CTAGCAAGATCCAGGGC |
| PIK3R4 | 655E>K            | TCTTTATGCCCTTACTTGTATGTGCCAGTTAGGACTGCTACAAAAC<br>CCCATGTTTAC[G/A]AATTTGCCAGTGATATTGGTAAGTTTCTGTTTC<br>TCAAATTAGAATGAGATTGGAAGAACTTTATAAAATTTCTAGGTAAT<br>ATAAAGAATT  |
| PIK3R4 | 1047T>M           | ACATTGGTTCATAAATGAATTTTATTTTTCTTTCATTGATCTATTCT<br>TACATACAGCCGAATTGGAGGACGAGTCAAGA[C/T]GCTCACATTCT<br>GCCAAGGCTCCCCTACTTTAGCCATAGCATCTGATAATGGTGCTGT<br>CCAGCTTCTTG  |
| PIK3R4 | R936Q             | AAACACCTCCCCGGCTCCCTTGGACCGACCTGACCAGGAGGTGGA<br>GCGGC[G/A]GCTGAGGCTGAGTCCATGCAGGCAGCGTTCCAGGGC<br>ATGCTGGATGCGGT                                                     |
| PIK3R5 | 12R>H             | GCAGGCGATGACCCAGGATGCAGCCAGGGGCCACGACATGCACG<br>GAGGACC[G/A]CATCCAGCATGCCCTGGAACGCTGCCTGCATGGAC<br>TCAGCCTCAGCCGCCGCTCCACCTCCTGGTCAGCTGGGCTGTGT                       |
| PIK3R5 | R28C              | ACCGCATCCAGCATGCCCTGGAACGCTGCCTGCATGGACTCAGCC<br>TCAGC[C/T]GCCGCTCCACCTCCTGGTCAGGTCGGTCCAAGGGAGC<br>CGGGGAGGTGTTT                                                     |
| PRKCZ  | R519C             | GCTGCCGGCCACAGACTGGATTTTCTGACATCAAGTCCCACGCGTT<br>CTTC[C/T]GCAGCATAGACTGGGACTTGGTAAAGCATCAAAAGCCT<br>ATTTGCACCCC                                                      |
| PRKCZ  | D230N             | CTCCCGGGAACCCCTCTCACTTTCTGGGGTCTTGTTCTCCCTCC<br>CTAG[G/A]ACCTTAAGCCAGTTATCGATGGGATGGATGGAATCAAAA<br>TCTCTCAGGGG                                                       |
| PRKCZ  | E574K             | CCCCTGCCACCTTTGCCACAGGGATGCCATAAAGAGGATCGACC<br>AGTCA[G/A]AGTTCGAAGGCTTTGAGTATATCAACCCATTATTGCTGT<br>CCACCGAGGAG                                                      |

|       |          |                                                                                                                   |
|-------|----------|-------------------------------------------------------------------------------------------------------------------|
| PRKCZ | R260H    | CTCTCAGGGGCTTGGGCTGCAGGACTTTGACCTAATCAGAGTCATC<br>GGGC[G/A]CGGGAGCTACGCCAAGGTTCTCCTGGTGCGGTTGAAGA<br>AGAATGACCAA  |
| PRKCZ | S514F    | CAAAGAGAGGCTCGGCTGCCGGCCACAGACTGGATTTTCTGACAT<br>CAAGT[C/T]CCACGCGTTCTTCCGCAGCATAGACTGGGACTTGGTAA<br>AGCATCACAAAG |
| PTEN  | C105W    | CCTTTTGAAGACCATAACCCACCACAGCTAGAACTTATCAAACCCTT<br>TTG[T/G]GAAGATCTTGACCAATGGCTAAGTGAAGATGACAATCATG<br>TTGCAGCAAT |
| PTEN  | G129*    | TAAGTGAAGATGACAATCATGTTGCAGCAATTCCTGTAAAGCTGGA<br>AAG[T/G]GACGAACTGGTGTAAATGATATGTGCATATTTATTACATCGG<br>GGCAAATTT |
| PTEN  | R130*    | GTGAAGATGACAATCATGTTGCAGCAATTCCTGTAAAGCTGGAAA<br>GGGA[T/C]GAACTGGTGTAAATGATATGTGCATATTTATTACATCGGG<br>GCAAATTTTTA |
| PTEN  | R335*    | TTACTTTAACAAAAAATGATCTTGACAAAGCAAATAAAGACAAAGCC<br>AAC[T/C]GATACTTTTCTCAAATTTTAAGGTGAAGCTGTACTTCACA<br>AAAACAGTA  |
| PTEN  | A86P     | AATTCAAGAGTTTTTTTTTCTTATTCTGAGGTTATCTTTTTACCACAG<br>TT[C/G]CACAATATCCTTTTGAAGACCATAACCCACCACAGCTAGAA<br>CTTATCAA  |
| PTEN  | C105F    | TCCTTTTGAAGACCATAACCCACCACAGCTAGAACTTATCAAACCCT<br>TTT[T/G]TGAAGATCTTGACCAATGGCTAAGTGAAGATGACAATCATG<br>TTGCAGCAA |
| PTEN  | C105S    | ATCCTTTTGAAGACCATAACCCACCACAGCTAGAACTTATCAAACC<br>TTT[A/T]GTGAAGATCTTGACCAATGGCTAAGTGAAGATGACAATCAT<br>GTTGCAGCA  |
| PTEN  | C105Y    | TCCTTTTGAAGACCATAACCCACCACAGCTAGAACTTATCAAACCCT<br>TTT[A/G]TGAAGATCTTGACCAATGGCTAAGTGAAGATGACAATCAT<br>GTTGCAGCAA |
| PTEN  | K267fs*9 | TGGTGATATCAAAGTAGAGTTCTTCCACAAACAGAACAAGATGCTAA<br>AAA[A]GGTTTGTACTTTACTTTTATTGGGAGAAATATCCAAAATAAG<br>GACAGATTA  |
| PTEN  | K6I      | CTCCTCCTTTTTCTTTCAGCCACAGGCTCCCAGACATGACAGCCATC<br>ATCA[A/T]AGAGATCGTTAGCAGAAACAAAAGGAGATATCAAGAGGA<br>TGGATTGACT |
| PTEN  | L25F     | GTTAGCAGAAACAAAAGGAGATATCAAGAGGATGGATTGACTTAG<br>ACTT[C/G]ACCTGTATCCATTTCTGCGGCTGCTCCTCTTTACCTTTCT                |

|      |              |                                                                                                                            |
|------|--------------|----------------------------------------------------------------------------------------------------------------------------|
|      |              | GTCACTCTCT                                                                                                                 |
| PTEN | Q171*        | AATTTGGCTTCTCTTTTTTTTTCTGTCCACCAGGGAGTAACTATTCCC<br>AGT[T/C]JAGAGGCGCTATGTGTATTATTATAGCTACCTGTAAAGAAT<br>CATCTGGAT         |
| PTEN | R130G        | GTGAAGATGACAATCATGTTGCAGCAATTCCTGTAAAGCTGGAAA<br>GGGA[C/G]GAACTGGTGAATGATATGTGCATATTTATTACATCGGG<br>GCAAATTTTAA            |
| PTEN | R130L        | TGAAGATGACAATCATGTTGCAGCAATTCCTGTAAAGCTGGAAA<br>GGAC[T/G]AACTGGTGAATGATATGTGCATATTTATTACATCGGGG<br>CAAATTTTAA              |
| PTEN | R130Q        | TGAAGATGACAATCATGTTGCAGCAATTCCTGTAAAGCTGGAAA<br>GGAC[A/G]AACTGGTGAATGATATGTGCATATTTATTACATCGGGG<br>CAAATTTTAA              |
| PTEN | R173C        | GCTTCTCTTTTTTTTTCTGTCCACCAGGGAGTAACTATTCCCAGTCAG<br>AGG[T/C]GCTATGTGTATTATTATAGCTACCTGTAAAGAATCATCTG<br>GATTATAGA          |
| PTEN | R173H        | CTTCTCTTTTTTTTTCTGTCCACCAGGGAGTAACTATTCCCAGTCAGA<br>GGC[A/G]CTATGTGTATTATTATAGCTACCTGTAAAGAATCATCTGG<br>ATTATAGAC          |
| PTEN | R233*        | TGGTCTGCCAGCTAAAGGTGAAGATATATTCCTCCAATTCAGGACC<br>CACA[T/C]GACGGGAAGACAAGTTCATGTACTTTGAGTTCCCTCAGC<br>CGTTACCTGTG          |
| PTEN | cytogenetics | GCTGCTCTTAGGGCAGGGATCAATTCCTTAATATCTTAGGAAGACTA<br>GGT[A/T]TTGACAGTAATGGTGACAAAGCAATGAAAAGGAAAGGAAG<br>AAGTGATAAG          |
| PTEN | cytogenetics | TTTTGTGATGATGAAATAAATACTATAAATAGTATTATTCCTTTGCA<br>TT[G/T]JAGAGTCCTGACGAAATGTCCATGTGACAGTTCATTTTGGGT<br>TAGCTCTA           |
| PTEN | cytogenetics | CAAGGGCTGGAAGAAACCTTAGTAGTAATCTCTTTGAGTCTAATTAT<br>CAT[G/A]TAGAATAGGAAATTGCGGTCTAGAAAGGTTAAGTGACTTG<br>TCCAAATTACACAAGTAGT |
| PTEN | cytogenetics | ATTTAGTTTAGAACAATTTATTTCTCAAGGCCCATGTAAATATTATTT<br>TT[A/G]AAATATACAGTCTTAAGAATTCATGGCATATTTTATGAAAGG<br>AGGAATTC          |
| PTEN | cytogenetics | AAGAGCCTTGTTGCGGATACCATAGTGTTTCTTTGGAGGAAAATAAA<br>AAC[T/C]JACAAAGCTTTGTATTTTTTGCACAAGTTCAGAAATATA<br>AGTAATAAA            |



|         |             |                                                                                                                    |
|---------|-------------|--------------------------------------------------------------------------------------------------------------------|
| RB1     | R556*       | AAGGCAACTTGACAAGAGAAATGATAAAACATTTAGAACGATGTGAA<br>CAT[C/T]GAATCATGGAATCCCTTGCATGGCTCTCAGTAAGTAGCTA<br>AATAATTGAA  |
| RB1     | Splice Site | TAAATTCAGCAAGTGATCAACCTTCAGAAAATCTGATTCCTATTTTA<br>AC[G/A]TAAGCCATATATGAAACATTATTTATTGTAATATCTTGGCAA<br>GAAACTT    |
| RB1     | L199*       | TACTGAAATAAATTCTGCATTGGTGCTAAAAGTTTCTTGGATCACATT<br>TT[T/A]ATTAGCTAAAGGTAAGTTCATTATATTTATTAATGCTAATAT<br>TTCAAAT   |
| RB1     | R320*       | AGGATAATTGTCAGTGACTTTTTTCTTTCAAGGTTGAAAATCTTTCTA<br>AA[C/T]GATACGAAGAAATTTATCTTAAAAATAAAGATCTAGATGCAA<br>GATTATTT  |
| RB1     | R455*       | TTCTTTTTGTTTGTGTTGTAGCGATACAAACTTGGAGTTCGCTTGTATT<br>AC[C/T]GAGTAATGGAATCCATGCTTAAATCAGTAAGTTAAAAACAAT<br>ATAAAAAA |
| RB1     | R552*       | TTATCAAAGCAGAAGGCAACTTGACAAGAGAAATGATAAAACATTTA<br>GAA[C/T]GATGTGAACATCGAATCATGGAATCCCTTGCATGGCTCTC<br>AGTAAGTAGC  |
| RB1     | R579*       | GTTTCATATAGGATTCACCTTTATTTGATCTTATTAACAATCAAAGG<br>AC[C/T]GAGAAGGACCAACTGATCACCTTGAATCTGCTTGTCTCTT<br>AATCTTCCT    |
| RET     | A664D       | CGTCTCGGTGCTGCTGTCTGCCTTCTGCATCCACTGCTACCACAAG<br>TTTG[A/C]CCACAAGCCACCCATCTCCTCAGCTGAGATGACCTTCCG<br>GAGGCCCGCCC  |
| RET     | M918T       | CAATGTCTTTATTCCATCTTCTCTTTAGGGTCCGATTCCAGTTAAAT<br>GGA[T/C]GGCAATTGAATCCCTTTTTGATCATATCTACACCACGCAA<br>GTGATGTGT   |
| RET     | R163Q       | CTTCTCCTTCTTCAACACCTCCTTTCCAGCCTGCAGCTCCCTCAAGC<br>CCC[A/G]GGAGCTCTGCTTCCCAGAGACAAGGCCCTCCTTCCGCAT<br>TCGGGAGAACC  |
| RET     | R360W       | GCAGCTTGGTGGTCATTGTTGTGCCCTACCTGCAGGGCTGGTTCT<br>CAAC[T/C]GGAACCTCTCCATCTCGGAGAACCGCACCATGCAGCTG<br>GCGGTGCTGGTC   |
| RET     | V145G       | ACCCACATCCCTTCGTGAGGGCGAGTGCCAGTGGCCAGGCTGTGC<br>CCGCG[T/G]ATACTTCTCCTTCTTCAACACCTCCTTTCCAGCCTGCA<br>GCTCCCTCAAGC  |
| RPS6KA2 | Splice Site | ACGTCCTGTGCACCATACCAAGACCATGGACTACCTCCATTCCCA<br>GGGG[G/A]TAGGAGCCATGCCTGGGGCAGCCTTCGGGGAGGAGGG                    |

|         |       |                                                                                                                    |
|---------|-------|--------------------------------------------------------------------------------------------------------------------|
|         |       | AGCTTCAGGGCAG                                                                                                      |
| RPS6KA2 | E311K | TGATGATCATTCTGTGTTGTTGACAGGTGCTGGCATTGACGGAGT<br>GGAG[G/A]AAATTAAGCGCCATCCCTTCTTTGTGACCATAGACTGGA<br>ACGTAAGTTGC   |
| RPS6KA2 | R732Q | GTCATCCAACCTGGCTCAGCGCAGAGGCATGAAGAGACTCACGTC<br>CACGC[G/A]GCTGTAGCGGGTGGGACCCTGGCCCCAGCGTCCCCT<br>GCCAGCATCCTCGT  |
| RPS6KA2 | S427* | CTTACCCGATGGCTACGAGATCAAGGAGGACATCGGGGTGGGCTC<br>CTACT[C/G]AGTGTGCAAGCGATGTGTGCATAAAGCCACAGACACC<br>GAGTATGCCGTGA  |
| RPS6KA3 | I416V | GGGACTCTTCACCAATTTATAATTTTTTTGTAGCAGTTACACAGGAAC<br>AGT[A/G]TTCAGTTTACTGATGGATATGAAGTAAAAGAAGATATTGGA<br>GTTGGCTCC |
| RPS6KA3 | L381H | ACTCTTTTCAGATTCACCTGGCATTCCACCTAGTGCTAATGCACATC<br>AGC[T/A]TTTTTCGGGGGTTTAGTTTTGTTGCTATTACCTCAGATGATG<br>AAAGCCAAG |
| RPS6KA3 | L608F | AAAGACAAGGCTATGATGCTGCTTGTGATATATGGAGTCTTGGTGT<br>CCTA[C/T]TCTATACAATGCTTACCGGGTGAGTGTATACCATATGTT<br>TAAGCACCTA   |
| RPS6KA3 | Y483C | CATATAGTTTCAAATAATTTTACATTTTGATGTTGAAATTTATAGGTA<br>T[A/G]TGATGATGGAAAGTATGTGTATGTAGTAACAGAACTTATGAAA<br>GGAGGTG   |
| RPS6KB1 | G289E | TGCTGTGGATTGGTGGAGTTTGGGAGCATTAAATGTATGACATGCTG<br>ACTG[G/A]AGCAGTAGGTGCACAGTTAAAAGCTGCATGTATTATTGG<br>TCTGTGCTGAG |
| SMAD4   | D351N | AGGTAGGAGAGACATTTAAGGTTCCCTTCAAGCTGCCCTATTGTTACT<br>GTT[G/A]ATGGATACGTGGACCCTTCTGGAGGAGATCGCTTTTGT<br>GGTCAACTC    |
| SMAD4   | G386R | CAAGATAAAATGTAATTTCTTTTTCTTCCCTAAGGTTGCACATAGGCA<br>AA[G/C]GTGTGCAGTTGGAATGTAAGGTGAAGGTGATGTTTGGGT<br>AGGTGCCTT    |
| SMAD4   | H132L | TCAGTATGCGTTTGACTTAAAATGTGATAGTGTCTGTGTGAATCCAT<br>ATC[A/T]CTACGAACGAGTTGTATCACCTGGAATTGGTAAGTAGACTT<br>TGCTTTCAT  |
| SMAD4   | P130S | AATATTGTCAGTATGCGTTTGACTTAAAATGTGATAGTGTCTGTGTG<br>AAT[C/T]CATATCACTACGAACGAGTTGTATCACCTGGAATTGGTAAG<br>TAGACTTTG  |

|       |           |                                                                                                                         |
|-------|-----------|-------------------------------------------------------------------------------------------------------------------------|
| SMAD4 | R361C     | GCTGCCCTATTGTTACTGTTGATGGATACGTGGACCCTTCTGGAGG<br>AGAT[C/T]GCTTTTGTGGGTCAACTCTCCAATGTCCACAGGACAG<br>AAGCCATTGAG         |
| SMAD4 | R445*     | TAGTATGAAATGTTTTTCTTAAAAGGTCTTTGATTTGCGTCAGTGT<br>AT[C/T]GACAGATGCAGCAGCAGGCGGCTACTGCACAAGCTGCAGC<br>AGCTGCCAG          |
| SMAD4 | W323fs*11 | CTCATGGGAGGATGTTCTTTCCATTTATTTCTATAGCTCCTGAGT<br>ATT[/GGTGTTTC]CATTGCTTACTTTGAAATGGATGTTTCAAGGTAGGAGA<br>GACATTTAAGGTTT |
| SMAD4 | Y353C     | AGAGACATTTAAGGTTCTTCAAGCTGCCCTATTGTTACTGTTGATG<br>GAT[A/G]CGTGGACCCTTCTGGAGGAGATCGCTTTTGTGGGTCAA<br>CTCTCCAATG          |
| SMG1  | D2416V    | AGCAGCAGCTTGCCTTCCAGGATTTTATAACCAAGCTGGCCCCCTAC<br>CACC[A/T]CAAGATGTCAACATTCCTTTTTTAAATAGAAGATTTCTTT<br>TATTGTGGG       |
| SMG1  | I3235T    | GGAAGGAAGATCTGGCAAACACACCTGAACTGTTGCAATAGAAGT<br>TTCA[A/G]TCTGGCTCAGGGTATGCAGCTTCTTTTTCATGCTGGTTA<br>GGATAGCAGAC        |
| SMG1  | K3579Q    | CCCAGTTTTAGGGTCTCTGACTGCCTTTTTAGGACTACAAGCAACAC<br>TCT[T/G]GCCAGTTCTGGAACGGTGCTGGTGGAGTATCAGCTGAT<br>GTAGCAAGAT         |
| SMG1  | Q1978*    | GCGTAAGGTGTTGTTGTTCTGGACTCTTTCACCTCATCTTCAAGCT<br>GCT[G/A]AATTCGTCTCAGGACATACATGTGTTGTTGCAGCAAACT<br>CCCAGCCAGA         |
| SMG1  | S2167C    | ACCGGGGTGTTTCTTGGCGATTAATTGTAGCAAACATGGTATTCACA<br>ATA[G/C]ATAGGAACTGCATTATTCTCTCATCCAGATGTAAATCCTCC<br>AGTCCTATG       |
| SMO   | R199W     | TGCAGAACATCAAGTTCAACAGTTCAGGCCAGTGCGAAGTGCCCTT<br>GGTT[C/T]GGACAGACAACCCCAAGAGCTGGTACGAGGACGTGGAG<br>GGCTGCGGCATC       |
| SMO   | V404M     | GTGGGATTTGTTTTGTGGGCTACAAGAACTACCGATACCGTGCGGG<br>CTTC[G/A]TGCTGGCCCCAATCGGCCTGGTGCTCATCGTGGGAGGC<br>TACTTCCTCATC       |
| SMO   | A324T     | GCTCCAATGAGACTCTGTCCTGCGTCATCATCTTTGTCATCGTGTAC<br>TAC[G/A]CCCTGATGGCTGGTGTGGTTTGGTTTGTGGTCTCACCTA<br>TGCCTGGCAC        |
| SMO   | A652V     | CCCCAGGCTCGTGTTGTCTCTCCTCCTGTCAGTGCCCCCAGAGGAA<br>CAAG[C/T]CAACCTGTGGCTGGTTGAGGCAGAGATCTCCCCAGAGC<br>TGCAGAAGCGCC       |
| SMO   | C78_L79>C | AGCCACTGCGGCCGGGCTGCCCTGCGAGCCGCTGCGCTACAA<br>CGTGTG[C/T]NTGGGCTCGGTGCTGCCCTACGGGGCCACCTCCACA                           |

|       |         |                                                                                                                     |
|-------|---------|---------------------------------------------------------------------------------------------------------------------|
|       | L       | CTGCTGGCCGGAGAC                                                                                                     |
| SMO   | D473H   | GCTTCCTGGCCTTTGGCTTTGTGCTCATTACCTTCAGCTGCCACTTC<br>TAC[G/C]ACTTCTTCAACCAGGCTGAGTGGGAGCGCAGCTTCCGGG<br>ACTATGTGCTG   |
| SMO   | K575M   | TGAGCCAAAGCGGATCAAGAAGAGCAAGATGATTGCCAAGGCCTTC<br>TCTA[A/T]GCGGCACGAGCTCCTGCAGAACCCAGGCCAGGAGCTGT<br>CCTTCAGCATGC   |
| SMO   | L514F   | CTGCCACCAAGCAGCCCATCCCTGACTGTGAGATCAAGAATCGCC<br>CGAG[C/T]NTCTGGTGGAGAAGATCAACCTGTTTGCCATGTTTGAA<br>CTGGCATCGCC     |
| SMO   | R484W   | AGCTGCCACTTCTACGACTTCTTCAACCAGGCTGAGTGGGAGCGCA<br>GCTT[C/T]NGGGACTATGTGCTGTGAGTGAGGGGCATGGAGGCGGC<br>AGTGCTGGGAGCT  |
| SMO   | R562Q   | TATCCCTTCTGCTCTCAGGTTGACTGGGCAGAGTGACGATGAGCCA<br>AAGC[G/A]GATCAAGAAGAGCAAGATGATTGCCAAGGCCTTCTCTAA<br>GCGGCACGAGC   |
| SMO   | S533N   | GGTGGAGAAGATCAACCTGTTTGCCATGTTTGGAAGTGGCATCGCC<br>ATGA[G/A]CACCTGGGTCTGGACCAAGGCCACGCTGCTCATCTGGA<br>GGCGTACCTGGT   |
| SMO   | T349I   | TGTGGTCCTCACCTATGCCTGGCACACTTCCTTCAAAGCCCTGGGC<br>ACCA[C/T]NTACCAGCCTCTCTCGGGCAAGACCTCCTACTTCCACCT<br>GCTCACCTGGTC  |
| SMO   | T640A   | CCAAGATGGTGGCTCGGAGAGGAGCCATACTGCCCCAGGATATTT<br>CTGTC[A/G]CCCCTGTGGCAACTCCAGGTATGAGAGTTCAAGCTTCT<br>GGAGGAAGGTGG   |
| SMO   | W535L   | GAAGATCAACCTGTTTGCCATGTTTGGAAGTGGCATCGCCATGAGC<br>ACCT[G/T]GGTCTGGACCAAGGCCACGCTGCTCATCTGGAGGCGTA<br>CCTGGTGCAGGT   |
| STK11 | D194Y   | TCAAGCCGGGGAACCTGCTGCTCACCACCGGTGGCACCCCTCAAAA<br>TCTCC[T/G]ACCTGGGCGTGGCCGAGGTAGGCACGTGCTAGGGGG<br>GGCCCTGGGGCGCC  |
| STK11 | G171S   | GCAGGTACTTCTGTCAGCTGATTGACGGCCTGGAGTACCTGCATAG<br>CCAG[A/G]GCATTGTGCACAAGGACATCAAGCCGGGGAACCTGCTG<br>CTCACCACCGGT   |
| STK11 | F354L   | GTGCCGTACTIONGGAGGACCTGCACGGCGCGGACGAGGACGAGGA<br>CCTCTT[C/G]GACATCGAGGATGACATCATCTACACTCAGGACTTCA<br>CGGTGCCCGGTGA |
| STK11 | E57fs*7 | GCAAGCGGGCCAAGCTCATCGGCAAGTACCTGATGGGGGACCTGC<br>TGGGG[G]AAGGCTCTTACGGCAAGGTGAAGGAGGTGCTGGACTC<br>GGAGACGCTGTGC     |
| STK11 | F354L   | GTGCCGTACTIONGGAGGACCTGCACGGCGCGGACGAGGACGAGGA<br>CCTCTT[C/G]GACATCGAGGATGACATCATCTACACTCAGGACTTCA                  |

|       |        |                                                                                                                     |
|-------|--------|---------------------------------------------------------------------------------------------------------------------|
|       |        | CGGTGCCCGGACA                                                                                                       |
| STK11 | P281fs | TTGTTTGAGAACATCGGGAAGGGGAGCTACGCCATCCCGGGCGAC<br>TGTGGCCCC[C]GCTCTCTGACCTGCTGAAAGGTGGGAGCCTCAT<br>CCCTCTGCCCGC      |
| STK11 | P281L  | TGAGAACATCGGGAAGGGGAGCTACGCCATCCCGGGCGACTGTGG<br>CCCC[T/C]GCTCTCTGACCTGCTGAAAGGTGGGAGCCTCATCCCT<br>CTGCCCGCAGCCC    |
| STK11 | P281L  | TGAGAACATCGGGAAGGGGAGCTACGCCATCCCGGGCGACTGTGG<br>CCCC[T/C]GCTCTCTGACCTGCTGAAAGGTGGGAGCCTCATCCCT<br>CTGCCCGCAGCCC    |
| STK11 | Q170*  | CCCGCAGGTA CTTCTGTCAGCTGATTGACGGCCTGGAGTACCTGCA<br>TAGC[T/C]AGGGCATTGTGCACAAGGACATCAAGCCGGGGAACCTG<br>CTGCTCACCACC  |
| STK11 | Q37*   | TGGGTATGGACACGTTTCATCCACCGCATCGACTCCACCGAGGTTCAT<br>CTAC[T/C]AGCCGCGCCGCAAGCGGGCCAAGCTCATCGGCAAGTAC<br>CTGATGGGGGAC |
| STK11 | W332*  | GCTGAAGCACCAGTGCCCATCCACCGAGCCCAGACACCAAGGAC<br>CGGTG[A/G]CGCAGCATGACTGTGGTGCCGTACTTGGAGGACCTGC<br>ACGGCGCGGACGA    |
| TBX22 | A51T   | AGCTGCGGGAGAAAAAGGGCGGAGAGGAAGAGGAGGAGAGAAGG<br>AGCAGC[G/A]CTGCAGGGAAGAGCGAGCCGCTTGGTAAGTACTGCC<br>ATTGCCCTGAGCCC   |
| TBX22 | D307N  | TATTGGATGGGCTTTTAGAGACCTACCCATGGAGGCCTTCTTTCACT<br>CTC[G/A]ATTTTAAAACCTTTGGCGCAGACACAAAAGTAAGAAACT<br>TGAACGTT      |
| TBX22 | P411T  | TAGCAAGCAGCAACAGTTCTCAGTCTTTAGCCCCACTCATGATGGA<br>AGTG[C/A]CTATGTTATCTTCCCTGGGGGTCAACCAATTCAAAAAGCG<br>GTTTCATCTGAA |
| TBX22 | V12M   | CTTCACCCCTCCAGGGATGGCTCTGAGCTCTCGGGCGCGTGCCT<br>TCTCC[G/A]TGGAAGCCTTGGTGGGGAGACCCAGCAAAGAAAAC<br>CCAAGACCCAATA      |
| TBX22 | V16A   | AGGGATGGCTCTGAGCTCTCGGGCGCGTGCCTTCTCCGTGGAAGC<br>CTTGG[T/C]GGGGAGACCCAGCAAAGAAAACCTCAAGACCCAATA<br>CAGGCGGAGCAGC    |
| TP53  | R213*  | GAGTGAAGGAAATTTGCGTGTGGAGTATTTGGATGACAGAAACAC<br>TTTT[T/C]GACATAGTGTGGTGGTGCCCTATGAGCCGCTGAGGTCT<br>GTTTGCAACT      |
| TP53  | R248L  | CATCCACTACA ACTACATGTGTAACAGTTCTGCATGGGCGGCATG<br>AACC[T/G]GAGGCCCATCCTCACCATCATCACACTGGAAGACTCCAG<br>GTCAGGAGCCA   |
| TP53  | R342*  | CTCCTTCCCAGCCTGGGCATCCTTGAGTTCCAAGGCCTCATTACAGC<br>TCTC[A/G]GAACATCTCGAAGCGCTCACGCCACGGATCTGCAGCA                   |

|      |              |                                                                                                                     |
|------|--------------|---------------------------------------------------------------------------------------------------------------------|
|      |              | ACAGAGGAGGGG                                                                                                        |
| TP53 | Y220C        | GGAGTATTTGGATGACAGAAACACTTTTTCGACATAGTGTGGTGGTG<br>CCCT[A/G]TGAGCCGCCTGAGGTCTGGTTTGCAACTGGGGTCTCTG<br>GGAGGAGGGGTT  |
| TP53 | cytogenetics | TTAAAGGACCAGACCAGCTTTCAAAAAGAAAATTGTTAAAGAGAGCA<br>TGA[A/T]AATGGTTCTATGACTTTGCCTGATACAGATGCTACTTGACT<br>TACGATGGT   |
| TP53 | cytogenetics | CCATCTCAGCTCACTGCAGCCTTGACCTCCCTGGGCTCCGGTGATT<br>TCAC[C/A]CTCCCAAGTAGCTAGGACTACAGGCACATGCCACGACA<br>CCCAGCTAATTT   |
| TP53 | cytogenetics | AGTGCTGGGATTACAGGCGTGAGCCACTGCACCTGCCTAGCCTATA<br>CTAA[G/A]TTCTCTAAAATCTGGCAAGGCAAATAGGACCCCTCTCC<br>ATTCTGTTGCT    |
| TP53 | E204*        | ATAGGGCACCACCACACTATGTGCGAAAAGTGTTTCTGTCATCCAAAT<br>ACT[A/C]CACACGCAAATTTCTTCCACTCGGATAAGATGCTGAGGA<br>GGGGCCAGAC   |
| TP53 | E224D        | GACAGAAACACTTTTTCGACATAGTGTGGTGGTGCCCTATGAGCCGC<br>CTGA[T/G]GTCTGGTTTGCAACTGGGGTCTCTGGGAGGAGGGGTTA<br>AGGGTGGTTGTC  |
| TP53 | E298*        | CGCTTCTTGTCTGCTTGCTTACCTCGCTTAGTGCTCCCTGGGGGC<br>AGCT[A/C]GTGGTGAGGCTCCCTTTCTTGC GGAGATTCTCTTCTC<br>TGTGCGCCGGT     |
| TP53 | G245S        | ACTGTACCACCATCCACTACAACACTACATGTGTAACAGTTCCTGCATG<br>GGC[A/G]GCATGAACCGGAGGCCCATCCTCACCATCATCACACTGG<br>AAGACTCCAGG |
| TP53 | G245V        | CTGTACCACCATCCACTACAACACTACATGTGTAACAGTTCCTGCATGG<br>GCG[T/G]CATGAACCGGAGGCCCATCCTCACCATCATCACACTGGA<br>AGACTCCAGGT |
| TP53 | P309S        | TCCATCCAGTGGTTTCTTCTTTGGCTGGGGAGAGGAGCTGGTGTG<br>TTGG[A/G]CAGTGCTAGGAAAGAGGCAAGGAAAGGTGATAAAAGTG<br>AATCTGAGGCAT    |
| TP53 | R158L        | GCCTCACAACCTCCGTCATGTGCTGTGACTGCTTGTAGATGGCCAT<br>GGCG[A/C]GGACGCGGGTGCCGGGCGGGGGTGTGGAATCAACCCA<br>CAGCTGCACAGGG   |
| TP53 | R175H        | CGCCATGGCCATCTACAAGCAGTCACAGCACATGACGGAGGTTGT<br>GAGGC[A/G]CTGCCCCACCATGAGCGCTGCTCAGATAGCGATGGT<br>GAGCAGCTGGGG     |
| TP53 | R196*        | AAAAGTGTTTCTGTCATCCAAATACTCCACACGCAAATTTCTTCCA<br>CTC[A/G]GATAAGATGCTGAGGAGGGGCCAGACCTAAGAGCAATCA<br>GTGAGGAATCA    |
| TP53 | R213Q        | AGTGGAAGGAAATTTGCGTGTGGAGTATTTGGATGACAGAAACACT<br>TTTC[A/G]ACATAGTGTGGTGGTGCCCTATGAGCCGCCTGAGGTCT                   |

|      |           |                                                                                                                   |
|------|-----------|-------------------------------------------------------------------------------------------------------------------|
|      |           | GGTTTGCAACTG                                                                                                      |
| TP53 | R248Q     | TGGCTCCTGACCTGGAGTCTTCCAGTGTGATGATGGTGAGGATGG<br>GCCTC[A/G]GGTTCATGCCGCCCATGCAGGAACTGTTACACATGTA<br>GTTGTAGTGGATG |
| TP53 | R248W     | GGCTCCTGACCTGGAGTCTTCCAGTGTGATGATGGTGAGGATGGG<br>CCTC[T/C]GGTTCATGCCGCCCATGCAGGAACTGTTACACATGTAGT<br>TGTAGTGGATGG |
| TP53 | R273C     | TTCTATCCTGAGTAGTGGTAATCTACTGGGACGGAACAGCTTTGA<br>GGTG[T/C]GTGTTTGTGCCTGTCCTGGGAGAGACCGGCCACAGAG<br>GAAGAGAATCTC   |
| TP53 | R273H     | TCCTATCCTGAGTAGTGGTAATCTACTGGGACGGAACAGCTTTGAG<br>GTGC[A/G]TGTTTGTGCCTGTCCTGGGAGAGACCGGCCACAGAGG<br>AAGAGAATCTCC  |
| TP53 | R273L     | TCCTATCCTGAGTAGTGGTAATCTACTGGGACGGAACAGCTTTGAG<br>GTGC[T/G]TGTTTGTGCCTGTCCTGGGAGAGACCGGCCACAGAGG<br>AAGAGAATCTCC  |
| TP53 | R306*     | AACTGCACCCTTGGTCTCCTCCACCGCTTCTTGTCTGCTTGCTTAC<br>CTC[A/G]CTTAGTGCTCCCTGGGGGCAGCTCGTGGTGAGGCTCCCC<br>TTTCTTGCGGA  |
| TP53 | S166*     | AGCAGCGCTCATGGTGGGGGCAGCGCCTCACAACCTCCGTGATGT<br>GCTGT[T/G]ACTGCTTGTAGATGGCCATGGCGCGGACGCGGGTGCC<br>GGGCGGGGGTGTG |
| TP53 | S241F     | CCAGTGTGATGATGGTGAGGATGGGCCTCCGGTTCATGCCGCCCA<br>TGCAG[A/G]AACTGTTACACATGTAGTTGTAGTGGATGGTGGTACAG<br>TCAGAGCCAACC |
| TP53 | V157F     | CACAACCTCCGTGATGTGCTGTGACTGCTTGTAGATGGCCATGGCG<br>CGGA[A/C]GCGGGTGCCGGGCGGGGGTGTGGAATCAACCCACAGC<br>TGCACAGGGCAGG |
| TP53 | V272M     | ATTCTCTTCTCTGTGCGCCGGTCTCTCCCAGGACAGGCACAAACA<br>CGCA[T/C]CTCAAAGCTGTTCCGTCCCAGTAGATTACCACTACTCAG<br>GATAGGAAAAG  |
| TP53 | Y126*     | ACAGGGCAGGTCTTGGCCAGTTGGCAAACATCTTGTGAGGGCA<br>GGGGA[T/G]TACTGTAGGAAGAGGAAGGAGACAGAGTTGAAAGTCA<br>GGGCACAAGTGAA   |
| WNK2 | A1253T    | TGAAGGATGTCATGGACAAGGCAGAGGACATGCTCAGCGAGGACA<br>CAGAC[G/A]CCGACCGTGGCTCCGACCCAGGGACCAGCCCGCCAC<br>ACCTCAGCACCTGC |
| WNK2 | G1619E    | TTTGTGTTTCTTTCTCCAGGTGGAGAAGTCAGAACTGGCCCCACT<br>CGAG[G/A]GGCCGTGATGGAGCAGGGCACGTCTCGTCAATGACA<br>GGTAACAGCTTCC   |
| WNK2 | S1373fs*5 | CAGGCGGGCCCCAGCAACCCTCCTGGGGCACCCCCAGCCCCTTTG<br>GCCCC[C]TCCTCCCCTCCTGTGACTGCTCTGCCCCAAGATGGAGC                   |

|        |            |                                                                                                                     |
|--------|------------|---------------------------------------------------------------------------------------------------------------------|
|        |            | AGCTCCAGCCAC                                                                                                        |
| WNK2   | S1978I     | CTTGGCTGACTCCAGCAGAGGCCCTCCCGCTAAGGACCCTGCCCA<br>AGCCA[G/T]TGTGGGGCTCACTGCAGACAGCACGGGCTGAGCGG<br>GAAGGCAGTGCAGA    |
| WNK2   | T2215fs*31 | GGCGCCCTCGGAACCGCCCGGAGAAACCAGGTGTGGTTTGGCCTC<br>CGAGT[/C]CCCCCACC GCCTGCTGTGGGCACAGCACTCAGCCGC<br>GAGGGGGACAGCG    |
| WNK2   | V496L      | ATGGAGCCATAGAGTTCACCTTCGACCTGGAGAAGGAGACGCCGG<br>ATGAG[G/T]TGGCCCAAGAGATGGTAAGCAGGACTCAGATGGGGTG<br>AGGTGGGTGCAGG   |
| ZNF668 | G286S      | GCCACGAGCGCACGCACTCGGGGGAGAAGCCCTTCTGTGCCCG<br>CGCTGC[G/A]GCCGCATGTTCTCCGACCCCTCGAGCTTCCGTCGCC<br>ACCAGCGCGCCCAT    |
| ZNF668 | A66T       | GCTCTGAAGAGGTGGCCGAGGTGAAGCCAAAGCCAGAGACAGAAG<br>CTAAG[G/A]CAGAGGAAGCCAGTGGGGAGAAGGTGTCAGGCTCCG<br>CGGCCAAGCCTAGG   |
| ZNF668 | R556Q      | GGAGCTCCGGCCCTTCCCCTGCACCCAGTGCGGCAAGAGCTTCTC<br>TGACC[G/A]GGCTGGGCTGCGCAAACACAGCCGCACTCACAGCTCA<br>GTGCGCCCCTACA   |
| ZNF668 | T331R      | CAAGGACTTCCGGCAGCCGGCGGACCTGGCCATGCACCGGCGTG<br>TGCACA[C/G]AGGCGACCGGCCGTTCAAGTGCCTGCAATGTGACAA<br>GACGTTCTGTTGGCGT |



**Supplemental Table 4: Sequenom Panel Gene List**

| Sequenom Assay          | Forward PCR Primer              | Reverse PCR prime                 | Extension Primer            |
|-------------------------|---------------------------------|-----------------------------------|-----------------------------|
| AKT1_G173R_G5 17C       | ACGTTGGATGTGATCCT GGTGAAGGAGAAG | ACGTTGGATGTCCTTGG CCACGATGACTTC   | GGTGAAGGAGAAGG CCACA        |
| AKT1_K179M_A5 36T       | ACGTTGGATGTGATCCT GGTGAAGGAGAAG | ACGTTGGATGTCCTTGG CCACGATGACTTC   | CGCTACTACGCCATG A           |
| AKT2_E17K_G49 A         | ACGTTGGATGCTTCAGC AGGAAGTACCGTG | ACGTTGGATGCACTCAA CCTTGCCTAACC    | CCTCCAGGTCTTGAT GTATT       |
| AKT2_G175R_G5 23C       | ACGTTGGATGTTGGCAA AGTCATCCTGGTG | ACGTTGGATGATGATGA CTTCTTCCGCAG    | TGGTGCGGGAGAAG GCCACT       |
| AKT3_G171R_G5 11A       | ACGTTGGATGTAGGTAA AGGCACTTTTGGG | ACGTTGGATGTCTTCAG AATCTTCATAGC    | TCGAGAGAAGGCAAG T           |
| ALK_F1174LIV_T 3520CAG  | ACGTTGGATGAAGATTT GCCCAGACTCAGC | ACGTTGGATGTGCAGCG AACAAATGTTCTGG  | GGATCTCTGCTCTGC AGCAAA      |
| ALK_F1174L_C35 22AG     | ACGTTGGATGTTGGTTA CATCCCTCTCTGC | ACGTTGGATGATTGCAG GCTCACCCCAATG   | CATCCCTCTCTGCTC TGCAGCAAATT |
| ALK_F1245C_T37 34G      | ACGTTGGATGATGACAG GAAGAGCACAGTC | ACGTTGGATGCCTGTGG CTGTCAGTATTTG   | TCACTTTGACTCACC GGTGGATG    |
| ALK_F1245VI_T3 733GA    | ACGTTGGATGCCTGTGG CTGTCAGTATTTG | ACGTTGGATGATGACAG GAAGAGCACAGTC   | TCAGTATTTGGAGGA AAACCAC     |
| ALK_I1171N_T35 12A      | ACGTTGGATGACCTCTC CAGGTTCTTTGGG | ACGTTGGATGCTGGATT TCCTCATGGAAGC   | GCTCTCTGTGGCTTT ACCTG       |
| ALK_R1275QL_G 3824AT    | ACGTTGGATGTGAGGCA GTCTTTACTCACC | ACGTTGGATGAAGAGTG GCCAAGATTGGAG   | CTTTACTCACCTGTA GATGTCT     |
| BRAF_D594GV_A 1781GT    | ACGTTGGATGTTCAAAC TGATGGGACCCAC | ACGTTGGATGTCTTCAT GAAGACCTCACAG   | TTCACTGTAGCTAGA CCAAAA      |
| BRAF_E586K_G1 756A      | ACGTTGGATGCCACTCC ATCGAGATTTAC  | ACGTTGGATGCCTTTAC TTACTIONACCTCAG | CCTATTTTTACTGTGA GGTCTT     |
| BRAF_G464EVA_G1391ATC   | ACGTTGGATGTACCATG CCACTTTCCCTTG | ACGTTGGATGTCCTGAT GGGCAGATTACAG   | AGATTACAGTGGGAC AAAGAATTG   |
| BRAF_G466EVA_G1397ATC   | ACGTTGGATGTACCATG CCACTTTCCCTTG | ACGTTGGATGTCCTGAT GGGCAGATTACAG   | CCTGTAGACTGTTC CAAATGAT     |
| BRAF_G466R_G1 396CA     | ACGTTGGATGTACCATG CCACTTTCCCTTG | ACGTTGGATGTCCTGAT GGGCAGATTACAG   | ACCTGTAGACTGTT CCAAATGATC   |
| BRAF_G469EVA_G1406ATC   | ACGTTGGATGTCCTGAT GGGCAGATTACAG | ACGTTGGATGTACCATG CCACTTTCCCTTG   | ACAGAATTGGATCTG GATCATTG    |
| BRAF_G469R_G1 405CA     | ACGTTGGATGTCCTGAT GGGCAGATTACAG | ACGTTGGATGTACCATG CCACTTTCCCTTG   | AGAATTGGATCTGGA TCATTT      |
| BRAF_K601E_A1 801G      | ACGTTGGATGTTCAAAC TGATGGGACCCAC | ACGTTGGATGTCTTCAT GAAGACCTCACAG   | GACCCACTCCATCGA GATT        |
| BRAF_L597R_T1 790G      | ACGTTGGATGTCTTCAT GAAGACCTCACAG | ACGTTGGATGTTCAAAC TGATGGGACCCAC   | GTA AAAATAGGTGAT TTTGGTC    |
| BRAF_V600EAG_T1799ACG_F | ACGTTGGATGTCTTCAT GAAGACCTCACAG | ACGTTGGATGTTCAAAC TGATGGGACCCAC   | AGGTGATTTTGGTCT AGCTACAG    |
| BRAF_V600LM_G 1798TA    | ACGTTGGATGTCTTCAT GAAGACCTCACAG | ACGTTGGATGTTCAAAC TGATGGGACCCAC   | TAGGTGATTTTGGTC TAGCTACA    |
| BRAF_V600_G18 00        | ACGTTGGATGTTCAAAC TGATGGGACCCAC | ACGTTGGATGTCTTCAT GAAGACCTCACAG   | ACCCACTCCATCGAG ATTT        |
| CDK4_R24H_G71 A         | ACGTTGGATGACTCTCA CACTCTTGAGGGC | ACGTTGGATGAATTGGT GTCGGTGCCTATG   | GGCCACTGTGGGGA TCA          |
| CTNNB1_D32HN Y_G94CAT   | ACGTTGGATGAAAGCGG CTGTTAGTCACTG | ACGTTGGATGTTACCAC TCAGAGAAGGAGC   | GAGCAACAGTCTTAC CTG         |
| CTNNB1_G34EV            | ACGTTGGATGACTGGCA               | ACGTTGGATGGCCTTTA                 | GTCTTACCTGGACTC             |

|                         |                                    |                                    |                               |
|-------------------------|------------------------------------|------------------------------------|-------------------------------|
| A_G101ATC               | GCAACAGTCTTAC                      | CCACTCAGAGAAG                      | TG                            |
| CTNNB1_S33APT_T97GCA    | ACGTTGGATGGCCTTTA<br>CCACTCAGAGAAG | ACGTTGGATGACTGGCA<br>GCAACAGTCTTAC | GTCACCAGAATGGAT<br>TCCAG      |
| CTNNB1_S37APT_T109GCA   | ACGTTGGATGGCCTTTA<br>CCACTCAGAGAAG | ACGTTGGATGACTGGCA<br>GCAACAGTCTTAC | GTGGTAGTGGCACCA<br>G          |
| CTNNB1_S37CF_Y_C110GTA  | ACGTTGGATGACTGGCA<br>GCAACAGTCTTAC | ACGTTGGATGGCCTTTA<br>CCACTCAGAGAAG | CTGGACTCTGGAATC<br>CATT       |
| CTNNB1_S45APT_T133GCA   | ACGTTGGATGTCTGGAA<br>TCCATTCTGGTGC | ACGTTGGATGGTATCCA<br>CATCCTCTTCTC  | GCCACTACCACAGCT<br>CCT        |
| CTNNB1_S45CF_Y_C134GTA  | ACGTTGGATGTCTGGAA<br>TCCATTCTGGTGC | ACGTTGGATGGTATCCA<br>CATCCTCTTCTC  | CCACTACCACAGCTC<br>CTT        |
| CTNNB1_T41APS_A121GCS   | ACGTTGGATGGCCTTTA<br>CCACTCAGAGAAG | ACGTTGGATGACTGGCA<br>GCAACAGTCTTAC | CTCAGAGAAGGAGCT<br>GTGG       |
| EGFR_G719_G2155TA       | ACGTTGGATGGAGGATC<br>TTGAAGGAAACTG | ACGTTGGATGCCTTACC<br>TTATACACCGTGC | TTCAAAAAGATCAAA<br>GTGCTG     |
| EGFR_K860I_A2579T       | ACGTTGGATGATTCTTTC<br>TCTTCCGCACCC | ACGTTGGATGACGTACT<br>GGTGAAAACACCG | CTCTTCCGCACCCAG<br>CAGT       |
| EGFR_L858R_T2573G       | ACGTTGGATGACGTACT<br>GGTGAAAACACCG | ACGTTGGATGATTCTTTC<br>TCTTCCGCACCC | GTCAAGATCACAGAT<br>TTTGGGC    |
| EGFR_L861_T2582AG       | ACGTTGGATGGCAGCAT<br>GTCAAGATCACAG | ACGTTGGATGCCTCCTT<br>CTGCATGGTATTC | TTTGGGCTGGCCAAA<br>C          |
| EGFR_S720P_T2158C       | ACGTTGGATGGAGGATC<br>TTGAAGGAAACTG | ACGTTGGATGCCTTACC<br>TTATACACCGTGC | GATCAAAGTGCTGGG<br>C          |
| EGFR_T790M_C2369T       | ACGTTGGATGATCTGCC<br>TCACCTCCACCGT | ACGTTGGATGTGTTCCC<br>GGACATAGTCCAG | TCCACCGTGCAGCTC<br>ATCA       |
| EGFR_T854I_C2561T       | ACGTTGGATGATTCTTTC<br>TCTTCCGCACCC | ACGTTGGATGACGTACT<br>GGTGAAAACACCG | CCAGCAGTTTGGCCA<br>GCCAAAATCT |
| EGFR_Y813C_A2438G       | ACGTTGGATGATGTCCG<br>GGAACACAAAGAC | ACGTTGGATGCTTCCCT<br>GATTACCTTTGCG | CAATATTGGCTCCCA<br>GT         |
| EPHA3_K761N_G2283       | ACGTTGGATGCAGACAT<br>GGGCTATGTTTAC | ACGTTGGATGACACGGC<br>AAAGTCCGAAATC | ACAGTAACTTGGTGT<br>GTAA       |
| FBWX7_R465C_C1393T      | ACGTTGGATGCCTTATAT<br>GGGCATACTTCC | ACGTTGGATGGAAGTCC<br>CAACCATGACAAG | ATGGGCATACTTCCA<br>CTGTG      |
| FBWX7_R465HL_G1394AT    | ACGTTGGATGGAAGTCC<br>CAACCATGACAAG | ACGTTGGATGCCTTATAT<br>GGGCATACTTCC | GGTTGTTTCATGAAG<br>ATGCATACAA |
| FBWX7_R479QL_G1436AT    | ACGTTGGATGTTTCTCC<br>CTCTGCAGAGTTG | ACGTTGGATGTGTAAC<br>ACTGGCCTGTCTC  | AAGAGTTGTTAGCGG<br>TTCTC      |
| FBWX7_R505HL_P_G1514ATC | ACGTTGGATGTGAGACA<br>GGCCAGTGTTTAC | ACGTTGGATGACCCTCC<br>TGCCATCATATTG | ATGGGTCATGTTGCA<br>GCAGTCC    |
| FGFR2_N549KK_T1647GA    | ACGTTGGATGTTTCTCT<br>CTACTCACCATCC | ACGTTGGATGTGGTGTG<br>AGAGATGGAGATG | CCCCGTGTGCAGGCT<br>CCAAGAAG   |
| FGFR2_S252W_C755G       | ACGTTGGATGTTCTTCC<br>CTCTCTCCACCAG | ACGTTGGATGGACCACT<br>GTGGAGGCATTTG | TCTTCCCTCTCTCCA<br>CCAGAGCAT  |
| FGFR3_A391E_C1172A      | ACGTTGGATGAGATCTT<br>GTGCACGGTGGG  | ACGTTGGATGGCTTCTT<br>CCTGTTTCATCTG | CGGGTGGCAGAGCG<br>TCACAGCC    |
| FGFR3_G370C_G1108T      | ACGTTGGATGATGTCTTT<br>GCAGCCGAGGAG | ACGTTGGATGATGAACA<br>GGAAGAAGCCAC  | GGAGGCTGACGAGG<br>CG          |
| FGFR3_K650MT_A1949TC    | ACGTTGGATGACGTGCA<br>CAACCTCGACTAC | ACGTTGGATGAGGCGTC<br>CTACTGGCATGA  | AACAACCTCGACTAC<br>TACAAGA    |
| FGFR3_R248C_C742T       | ACGTTGGATGTGGCCCC<br>TGAGCGTCATCT  | ACGTTGGATGCAGCACC<br>GCCGTCTGGTTG  | TCATCTGCCCCACA<br>GAG         |
| FGFR3_S371C_A1111T      | ACGTTGGATGATGAACA<br>GGAAGAAGCCAC  | ACGTTGGATGATGTCTTT<br>GCAGCCGAGGAG | AGGATGCCTGCATAC<br>ACAC       |
| FOXL2_C134W_            | ACGTTGGATGGAAGGGC                  | ACGTTGGATGAACTACT                  | TTGCCCTTCTCGAAC               |

|                      |                                     |                                     |                                |
|----------------------|-------------------------------------|-------------------------------------|--------------------------------|
| C402G                | CTCTTCATGCGG                        | GGACGCTGGACCC                       | ATGTCTTC                       |
| FRAP_R2505P_G7514C   | ACGTTGGATGACACATG<br>ACACACTCACCAG  | ACGTTGGATGACGGTTT<br>GGTGAAACCAGAG  | CCCCACACTCACCAG<br>TGAGCTTATCT |
| FRAP_S2215Y_C6644T   | ACGTTGGATGTAACACC<br>CTTCTGGCCAATG  | ACGTTGGATGTGTTGCC<br>ATTTCAAGGGTTTC | GCCAATGACCCAACA<br>T           |
| GNA11_Q209LP_A626TC  | ACGTTGGATGGGATGTC<br>ACGTTCTCAAAGC  | ACGTTGGATGTCCTTTC<br>AGGATGGTGGATG  | AAAGCTTCCTCCGCT<br>CCGACCGC    |
| GNAQ_Q209H_A627T     | ACGTTGGATGCACTAAG<br>CGCTACTAGAAAC  | ACGTTGGATGTGCAGAA<br>TGGTCGATGTAGG  | CCATTTTCTTCTCTCT<br>GACCT      |
| GNAS_R201H_G602A     | ACGTTGGATGTGACTTT<br>GTCCACCTGGAAC  | ACGTTGGATGTTTGTTC<br>AGGACCTGCTTC   | TGATTCCAGAAGTCA<br>GGACA       |
| GNAS_R201SC_C601AT   | ACGTTGGATGGGTCTCA<br>AAGATTCCAGAAG  | ACGTTGGATGGGCTTTG<br>GTGAGATCCATTG  | GTCCAGAAGTCAGGA<br>CAC         |
| IDH1_R132CGS_C394TGA | ACGTTGGATGACATGAC<br>TACTTTGATCCCC  | ACGTTGGATGAAAATAT<br>CCCCCGGCTTGTG  | CTTACTTGATCCCCA<br>TAAGCATGAC  |
| IDH1_R132HL_G395AT   | ACGTTGGATGAAAATAT<br>CCCCCGGCTTGTG  | ACGTTGGATGACATGAC<br>TACTTTGATCCCC  | GGGTAAAACCTATCA<br>TCATAGGTC   |
| IDH2_R140LQ_G419TA   | ACGTTGGATGGATGTGG<br>AAAAGTCCCAATG  | ACGTTGGATGCTAGGCG<br>TGGGATGTTTTTG  | AAACGTCCCAATGGA<br>ACTATCC     |
| IDH2_R140W_C418T     | ACGTTGGATGGATGTGG<br>AAAAGTCCCAATG  | ACGTTGGATGCTAGGCG<br>TGGGATGTTTTTG  | GGAAAAGTCCCAATG<br>GAACTATC    |
| IDH2_R140W_C419T     | ACGTTGGATGGATGTGG<br>AAAAGTCCCAATG  | ACGTTGGATGCTAGGCG<br>TGGGATGTTTTTG  | TGAAAAGTCCCAAT<br>GAACTATC     |
| IDH2_R172GW_A514GT   | ACGTTGGATGAAAACAT<br>CCCACGCCTAGTC  | ACGTTGGATGAGTGGAT<br>CCCCTCTCCACC   | GCCCATCACCATTGG<br>C           |
| IDH2_R172MK_G515TA   | ACGTTGGATGAGTGGAT<br>CCCCTCTCCACC   | ACGTTGGATGAAAACAT<br>CCCACGCCTAGTC  | AAATGGTCGCCATGG<br>GCGTGC      |
| IDH2_R172S_G516T     | ACGTTGGATGAGGTCAG<br>TGGATCCCCTCTC  | ACGTTGGATGTGGACCA<br>AGCCCATCACCAT  | GCCTACCTGGTCGCC<br>ATGGGCGTG   |
| JAK2_V617F_G1849T    | ACGTTGGATGAGGCATT<br>AGAAAGCCTGTAG  | ACGTTGGATGGCTTTCT<br>CACAAGCATTGGG  | CTCTCGTCTCCACAG<br>A           |
| KIT_D816HNY_G2446CAT | ACGTTGGATGCTCATGG<br>TCGGATCACAAAG  | ACGTTGGATGGAATGGG<br>TACTCACGTTTCC  | ATTTTGGTCTAGCCA<br>GA          |
| KIT_K642E_A1924G     | ACGTTGGATGCAGGCTC<br>CAAGTAGATTAC   | ACGTTGGATGCATTTGA<br>CAGAACGGGAAGC  | TACCAAGGTAECTCA<br>GGACTT      |
| KIT_L576P_T1727C     | ACGTTGGATGGTATGAA<br>GTACAGTGAAGG   | ACGTTGGATGGGGAAAC<br>TCCCATTTGTGAT  | ACATAGACCCAACAC<br>AAC         |
| KIT_N566D_A1696G     | ACGTTGGATGGAAGTTG<br>TGTTGGGTCTATG  | ACGTTGGATGCCACAG<br>AAACCCATGTATG   | TGGGTCTATGTAAC<br>ATAATTGT     |
| KIT_N822KNK_T2466GCA | ACGTTGGATGACTGTCA<br>AGCAGAGAATGGG  | ACGTTGGATGTTGGTCT<br>AGCCAGAGACATC  | ACTCACGTTTCCTTTA<br>ACCACATA   |
| KIT_N822YHD_A2464TCG | ACGTTGGATGACTGTCA<br>AGCAGAGAATGGG  | ACGTTGGATGTTGGTCT<br>AGCCAGAGACATC  | CTCACGTTTCCTTTAA<br>CCACATAAT  |
| KIT_R634W_C1900T     | ACGTTGGATGTTGCCAG<br>TTGTGCTTTTTCG  | ACGTTGGATGTTTGTAGT<br>TCAGACATGAGGG | TTTAGCGAGTGCCCA<br>TTTGACAGAA  |
| KIT_V559ADG_T1676CAG | ACGTTGGATGGAAGTTG<br>TGTTGGGTCTATG  | ACGTTGGATGCCACAG<br>AAACCCATGTATG   | TTTCCATTTATCTCCT<br>CAACA      |
| KIT_V825A_T2474C     | ACGTTGGATGACTGTCA<br>AGCAGAGAATGGG  | ACGTTGGATGTTGGTCT<br>AGCCAGAGACATC  | ATGGGTACTCACGTT<br>TCCTTTA     |
| KIT_Y553N_T1657A     | ACGTTGGATGTCTCCTC<br>AACAACCTTCCAC  | ACGTTGGATGTTTCCCT<br>TTCTCCCCACAG   | ACAACCTTCCACTGT<br>ACTTCAT     |
| KRAS_A146PT_G436CA   | ACGTTGGATGCAGTGTT<br>ACTTACCTGTCTTG | ACGTTGGATGGCTCAGG<br>ACTTAGCAAGAAG  | GTGTTACTTACCTGT<br>CTTGTCTTTG  |
| KRAS_G10R_G2         | ACGTTGGATGTAGCTGT                   | ACGTTGGATGAGGCCTG                   | TCTTGCCTACGCCAC                |

|                     |                                     |                                    |                                |
|---------------------|-------------------------------------|------------------------------------|--------------------------------|
| 8A                  | ATCGTCAAGGCAC                       | CTGAAAATGACTG                      | CAGCTC                         |
| KRAS_G12DAV_G35ACT  | ACGTTGGATGTAGCTGT<br>ATCGTCAAGGCAC  | ACGTTGGATGGACTGAA<br>TATAAACTTGTGG | ACTCTTGCCTACGCC<br>A           |
| KRAS_G12SRC_G34ACT  | ACGTTGGATGTAGCTGT<br>ATCGTCAAGGCAC  | ACGTTGGATGGACTGAA<br>TATAAACTTGTGG | CTCTTGCCTACGCCA<br>C           |
| KRAS_G13DAV_G38ACT  | ACGTTGGATGGTTGGAT<br>CATATTCGTCCAC  | ACGTTGGATGTAAACTT<br>GTGGTAGTTGGAG | GGCACTCTTGCCTAC<br>G           |
| KRAS_G13SRC_G37ACT  | ACGTTGGATGTAGCTGT<br>ATCGTCAAGGCAC  | ACGTTGGATGGACTGAA<br>TATAAACTTGTGG | GTCAAGGCACTCTTG<br>CCTACGC     |
| KRAS_Q61EKX_C181GAT | ACGTTGGATGCATGTAC<br>TGGTCCCTCATTG  | ACGTTGGATGTGGAGAA<br>ACCTGTCTCTTGG | TCATTGCACTGTACT<br>CCTCTT      |
| KRAS_Q61HHE_A183CTG | ACGTTGGATGTGGAGAA<br>ACCTGTCTCTTGG  | ACGTTGGATGCATGTAC<br>TGGTCCCTCATTG | CTCGACACAGCAGGT<br>CA          |
| KRAS_Q61LPR_A182TCG | ACGTTGGATGCATGTAC<br>TGGTCCCTCATTG  | ACGTTGGATGTGGAGAA<br>ACCTGTCTCTTGG | TGCACTGTACTCCTC<br>T           |
| MET_H1112Y_C3334T   | ACGTTGGATGACGCAGT<br>GCTAACCAAGTTC  | ACGTTGGATGGCCATCA<br>TTGTCCAACAAAG | GCACAGGGCATTTTG<br>GTTGTGTATAT |
| MET_H1112_A3335GT   | ACGTTGGATGTCTTGCC<br>ATCATTGTCCAAC  | ACGTTGGATGACGCAGT<br>GCTAACCAAGTTC | ACCTCATTGTCCAAC<br>AAAGTCCCA   |
| MET_M1268T_T3803C   | ACGTTGGATGCATCTGA<br>CTTGGTGGTAAAC  | ACGTTGGATGAAAACAG<br>GTGCAAAGCTGCC | TGAGTTTGCAGACTT<br>TCCAAAGCC   |
| MET_N375S_A1124G    | ACGTTGGATGCCATGTG<br>TGCATTCCCTATC  | ACGTTGGATGGCTGGAG<br>ACATCTCACATTG | TCAAATATGTCAACG<br>ACTTCTTCA   |
| MET_R988C_C2962T    | ACGTTGGATGCTCTGTT<br>TTAAGATCTGGGC  | ACGTTGGATGGCCTATC<br>CAAATGAGGAGTG | ATCTGGGCAGTGAAT<br>TAGTT       |
| MET_T1010I_C3029T   | ACGTTGGATGCACTCCT<br>CATTGGATAGGC   | ACGTTGGATGGCTCGGT<br>AGTCTACAGATTC | TGCCCGAAGTGTAAG<br>CCCAA       |
| MET_Y1248HD_T3742CG | ACGTTGGATGGCTGATT<br>TTGGTCTTGCCAG  | ACGTTGGATGGCAGCTT<br>TGCACCTGTTTTG | GGGTTTTGGTCTTGC<br>CAGAGACATG  |
| MET_Y1253D_T3757G   | ACGTTGGATGGCAGCTT<br>TGCACCTGTTTTG  | ACGTTGGATGGCTGATT<br>TTGGTCTTGCCAG | CACCTGTTTTGTTGT<br>GTACACTAT   |
| NRAS_A146T_G436A    | ACGTTGGATGGCTGAAA<br>GCTGTACCATAACC | ACGTTGGATGACGAACT<br>GGCCAAGAGTTAC | AGCTGTACCATACT<br>GTCTGGTCTTGG |
| NRAS_G12DAV_G35ACT  | ACGTTGGATGAGTGGTT<br>CTGGATTAGCTGG  | ACGTTGGATGGACTGAG<br>TACAACTGGTGG  | CCCGCTTTTCCCAAC<br>ACCA        |
| NRAS_G12SRC_G34ACT  | ACGTTGGATGGACTGAG<br>TACAACTGGTGG   | ACGTTGGATGAGTGGTT<br>CTGGATTAGCTGG | ACAACTGGTGGTGG<br>TTGGAGCA     |
| NRAS_G13DAV_G38ACT  | ACGTTGGATGAGTGGTT<br>CTGGATTAGCTGG  | ACGTTGGATGGACTGAG<br>TACAACTGGTGG  | CAGTGCCTTTTCCC<br>ACA          |
| NRAS_Q61EKX_C181GAT | ACGTTGGATGCCTGTTT<br>GTTGGACATACTG  | ACGTTGGATGTCGCCTG<br>TCCTCATGTATTG | GACATACTGGATACA<br>GCTGGA      |
| NRAS_Q61HHQ_A183TCG | ACGTTGGATGTCGCCTG<br>TCCTCATGTATTG  | ACGTTGGATGCCTGTTT<br>GTTGGACATACTG | CCTCATGGCACTGTA<br>CTCTTC      |
| PDGFRA_D842V_A2525T | ACGTTGGATGCACTGCC<br>TTTCGACACATAG  | ACGTTGGATGAGATCTG<br>TGACTTTGGCCTG | TTCGAATCATGCATG<br>ATG         |
| PDGFRA_D842_G2524TA | ACGTTGGATGAGATCTG<br>TGACTTTGGCCTG  | ACGTTGGATGCACTGCC<br>TTTCGACACATAG | AGATCTGTACTTTG<br>GCCTGGCCAGA  |
| PDGFRA_N659K_C1977A | ACGTTGGATGACCTGGG<br>GCCACATTTGAAC  | ACGTTGGATGAAATCCT<br>CACTCCAGGTCAG | GCCACATTTGAACAT<br>TGTA        |
| PDGFRA_N659Y_A1975T | ACGTTGGATGAAATCCT<br>CACTCCAGGTCAG  | ACGTTGGATGACCTGGG<br>GCCACATTTGAAC | TGGTGCAGGCTCCCA<br>GCAAGT      |
| PDGFRA_V561D_T1682A | ACGTTGGATGCCTGTCC<br>TGGTCATTTATAG  | ACGTTGGATGATTCATG<br>TCCATCTGGGCTG | GAAATTCGCTGGAGG<br>G           |
| PDPK1_D527E_C       | ACGTTGGATGTCCAAC                    | ACGTTGGATGGCCTAAC                  | TGTGCGTTCCCGCTG                |

|                          |                                    |                                     |                                |
|--------------------------|------------------------------------|-------------------------------------|--------------------------------|
| 1581G                    | CTCCTGGATCTTC                      | AGGACGTATTATC                       | GG                             |
| PDPK1_T354M_C1061T       | ACGTTGGATGCAGGTAA<br>GCGGTGAGCTTC  | ACGTTGGATGTAAAGCA<br>CACCCGTTCTTCG  | GCGGTGAGCTTCGG<br>AGGC         |
| PHLPP2_L1016S_T3047C     | ACGTTGGATGTGTACGT<br>CACGTACAAGACC | ACGTTGGATGCATTGTC<br>CTGACAGCCATAG  | TAAGAAGCTGTGCAC<br>AT          |
| PIK3CA_A1046V_C3137T     | ACGTTGGATGAACTGAG<br>CAAGAGGCTTTGG | ACGTTGGATGTCCATTTT<br>TGTTGTCCAGCC  | TCATGAAACAAATGA<br>ATGATG      |
| PIK3CA_C420R_T1258C      | ACGTTGGATGGAAAAGT<br>GTTTTGAAATGTG | ACGTTGGATGAGTTTATA<br>TTTCCCATGCC   | TTTTTTGTTTTTTAA<br>GGAACAC     |
| PIK3CA_E110K_G328A       | ACGTTGGATGACCTTCG<br>GCTTTTTCAACCC | ACGTTGGATGTACCAAT<br>TTCTCGATTGAGG  | AGTAGGCAACCGTGA<br>A           |
| PIK3CA_E418K_G1252A      | ACGTTGGATGATTTCCC<br>CATGCCAATGGAC | ACGTTGGATGTGGGGAA<br>GAAAAGTGTTTTG  | CCATGCCAATGGACA<br>GTGTT       |
| PIK3CA_E453K_G1357A      | ACGTTGGATGGGATTTG<br>ATCCAGTAACACC | ACGTTGGATGGGCTTTG<br>AATCTTTGGCCAG  | AGGGTTCAGCAAATC<br>TT          |
| PIK3CA_E542KQ_G1624AC    | ACGTTGGATGTAGCACT<br>TACCTGTGACTCC | ACGTTGGATGGCAATTT<br>CTACACGAGATCC  | TTCTCCTGCTCAGTG<br>ATTT        |
| PIK3CA_E542VG_A1625TG    | ACGTTGGATGGCAATTT<br>CTACACGAGATCC | ACGTTGGATGTAGCACT<br>TACCTGTGACTCC  | ACGAGATCCTCTCTC<br>TG          |
| PIK3CA_E545AG_V_A1634CGT | ACGTTGGATGTACACGA<br>GATCCTCTCTCTG | ACGTTGGATGTAGCACT<br>TACCTGTGACTCC  | CCTCTCTCTGAAATC<br>ACTG        |
| PIK3CA_E545D_G1635CT     | ACGTTGGATGTACACGA<br>GATCCTCTCTCTG | ACGTTGGATGTAGCACT<br>TACCTGTGACTCC  | CTCTCTCTGAAATCA<br>CTGA        |
| PIK3CA_E545KQ_G1633AC    | ACGTTGGATGTACACGA<br>GATCCTCTCTCTG | ACGTTGGATGTAGCACT<br>TACCTGTGACTCC  | CCTCTCTCTGAAATC<br>ACT         |
| PIK3CA_F909L_C2727G      | ACGTTGGATGCTTGTCC<br>ATCGTCTTTCACC | ACGTTGGATGCGTTCAT<br>GTGCTGGATACTG  | CACGATCTCCAATTC<br>CCAAAAT     |
| PIK3CA_G1049R_G3145C     | ACGTTGGATGGTGTGGA<br>AGATCCAATCCAT | ACGTTGGATGAACTGAG<br>CAAGAGGCTTTGG  | TTTGTGTCCAGCCA<br>C            |
| PIK3CA_H1047R_L_A3140GT  | ACGTTGGATGAACTGAG<br>CAAGAGGCTTTGG | ACGTTGGATGTCCATTTT<br>TGTTGTCCAGCC  | GAAACAAATGAATGA<br>TGCAC       |
| PIK3CA_H1047Y_C3139T     | ACGTTGGATGTCCATTTT<br>TGTTGTCCAGCC | ACGTTGGATGAACTGAG<br>CAAGAGGCTTTGG  | GTCCAGCCACCATGA<br>T           |
| PIK3CA_H701P_A2102C      | ACGTTGGATGTTGGAGT<br>CCTATTGTCGTGC | ACGTTGGATGTGAGCTT<br>TTCCATTGCCTCG  | GTGGGATGTATTTGA<br>AGC         |
| PIK3CA_K111N_G333C       | ACGTTGGATGACCTTCG<br>GCTTTTTCAACCC | ACGTTGGATGGTATCAT<br>ACCAATTTCTCG   | GTAGGCAACCGTGAA<br>GAAAA       |
| PIK3CA_M1043I_G3129ATC   | ACGTTGGATGAACTGAG<br>CAAGAGGCTTTGG | ACGTTGGATGTCCATTTT<br>TGTTGTCCAGCC  | GTTGGAGTATTTTCA<br>GAAACAAAT   |
| PIK3CA_M1043V_A3127G     | ACGTTGGATGTCCATTTT<br>TGTTGTCCAGCC | ACGTTGGATGAACTGAG<br>CAAGAGGCTTTGG  | ACCATGATGTGCATC<br>ATTCA       |
| PIK3CA_N345K_T1035A      | ACGTTGGATGGGGTTAT<br>AAATAGTGCCTC  | ACGTTGGATGGCATCAG<br>CATTTGACTTTACC | CAATTCCTTTGTGCAA<br>CCTACGTGAA |
| PIK3CA_P539R_C1616G      | ACGTTGGATGTTCTCCT<br>GCTCAGTGATTTT | ACGTTGGATGCAGACTA<br>GCTAGAGACAATG  | CTCAGTGATTTCAGA<br>GAGA        |
| PIK3CA_Q060K_C178A       | ACGTTGGATGAAGAAGC<br>AAGAAAATACCCC | ACGTTGGATGTTCCCTTT<br>CTGCTTCTTGAG  | GAAAATACCCCCTCC<br>AT          |
| PIK3CA_Q546EK_C1636GA    | ACGTTGGATGTAGCACT<br>TACCTGTGACTCC | ACGTTGGATGTACACGA<br>GATCCTCTCTCTG  | GACTCCATAGAAAAT<br>CTTTCTCCT   |
| PIK3CA_Q546LP_R_A1637TCG | ACGTTGGATGTAGCACT<br>TACCTGTGACTCC | ACGTTGGATGTACACGA<br>GATCCTCTCTCTG  | CTCCATAGAAAATCTT<br>TCTCC      |
| PIK3CA_R088Q_G263A       | ACGTTGGATGAGGGTTG<br>AAAAAGCCGAAGG | ACGTTGGATGTACTION<br>GAAGCAGAAAGGG  | GCCGAAGGTCACAAA<br>GT          |
| PIK3CA_S405F_            | ACGTTGGATGACCTCTT                  | ACGTTGGATGCATTCTT                   | CCCGGCCTTTAACAG                |

|                         |                                       |                                     |                               |
|-------------------------|---------------------------------------|-------------------------------------|-------------------------------|
| C1214T                  | TAGCACCCCTTTTCG                       | GATCTTCCTCGTG                       | AGCAAATG                      |
| PIK3CA_T1025SA_A3073TG  | ACGTTGGATGTACTIONCA<br>AAGCCTCTTGCTC  | ACGTTGGATGCTCTGGA<br>ATGCCAGAACTAC  | GCAGTTTTATCTAAG<br>GCTAGGG    |
| PIK3CA_Y1021C_A3062G    | ACGTTGGATGTACTIONCA<br>AAGCCTCTTGCTC  | ACGTTGGATGCTCTGGA<br>ATGCCAGAACTAC  | GCTAGGGTCTTTCGA<br>ATG        |
| PIK3CA_Y1021H_N_T3061CA | ACGTTGGATGTACTIONCA<br>AAGCCTCTTGCTC  | ACGTTGGATGCTCTGGA<br>ATGCCAGAACTAC  | AAGGCTAGGGTCTTT<br>CGAATGT    |
| PIK3R1_D560Y_G1678T     | ACGTTGGATGAGACTTG<br>AAGAAGCAGGCAG    | ACGTTGGATGTGGTCTC<br>TCGTCTTTCTCAG  | AGCTGAGTATCGAGA<br>AATT       |
| PIK3R1_M326I_G978N      | ACGTTGGATGACTACTG<br>TAGCCAACAACGG    | ACGTTGGATGTTACCTC<br>GAGATATCTCCCC  | CCAACAACGGTATGA<br>ATAACAATAT |
| PIK3R1_N564K_C1693AG    | ACGTTGGATGAGACTTG<br>AAGAAGCAGGCAG    | ACGTTGGATGTGGTCTC<br>TCGTCTTTCTCAG  | TCGAGAAATTGACAA<br>ACGTATGAA  |
| PRKAG1_R70Q_G209A       | ACGTTGGATGTTGGCTA<br>CAGGTGAAGAAAG    | ACGTTGGATGGCTTACC<br>CACAAAACCTTTGC | GGTGACTAACGGTGT<br>AC         |
| PRKAG2_N488I_A1463T     | ACGTTGGATGTACTIONGTG<br>AACGGTGCTGAAG | ACGTTGGATGGTAATTA<br>ATCTTGCTGCTGAG | CTGGGTCACCGTGAT<br>ATCTAGGTTA |
| RET_M918T_T2753C        | ACGTTGGATGCATCACT<br>TTGCGTGGTGTAG    | ACGTTGGATGTCTTTAG<br>GGTCGGATTCCAG  | GAAAGGGATTCAATT<br>GCC        |
| TNK2_E346K_G1036A       | ACGTTGGATGACCTTCA<br>GATCCTGCATAAG    | ACGTTGGATGCCATGAC<br>GTTGTAGATGTCC  | GATCCTGCATAAGAT<br>CGACAAG    |
| TNK2_R99Q_G296A         | ACGTTGGATGCACCTCA<br>TCACTCTCAGAGC    | ACGTTGGATGAATGAGG<br>CAGGTGAGGCTCT  | ATCACTCTCAGAGCA<br>CCTTCC     |

### Supplemental Table 5: PK/PD Analysis of 1,5-AG

Values for 1,5-anhydroglucitol (1,5-AG) were obtained on Week 3 (W3) and Week 5 (W5) while serial samples for pharmacokinetics (PK) were obtained on W2 and W4. The 1,5-AG percent change from baseline from W3 and W5 was assessed with PK parameters from W2 and W4, respectively. The comparisons will be referred to by PK weeks.

The relationship between 1,5-AG percent change from baseline and PK parameters were evaluated at W2 and W4 separately. 3 subjects did not have either a PK parameter and/or a 1,5-AG value on W4. Therefore, a third analyses was completed called Week 4/2 (W4/2). In the W4/2 analysis, W4 values were included for those subjects with W4 values and W2 values were included for the 3 subjects without W4 values.

#### Linear Regression Results

| Pharmacokinetic Parameter                                                  | Slope (SE) [p-value]      | Intercept (SE)  | r <sup>2</sup> |
|----------------------------------------------------------------------------|---------------------------|-----------------|----------------|
| <b>Week 3 1,5-AG Percent Change from Baseline/ Week 2 PK Parameter</b>     |                           |                 |                |
| Ct(pre-dose) (ng/mL)                                                       | -0.0613 (0.0376) [0.1415] | 12.457 (10.634) | 0.2496         |
| Cmax (ng/mL)                                                               | -0.0535 (0.0325) [0.1386] | 14.710 (11.826) | 0.2528         |
| AUC(0-5) (ng*h/mL)                                                         | -0.0144 (0.0077) [0.0992] | 16.586 (11.495) | 0.303          |
| <b>Week 5 1,5-AG Percent Change from Baseline/ Week 4 PK Parameter</b>     |                           |                 |                |
| Ct(pre-dose) (ng/mL)                                                       | -0.2762 (0.0536) [0.0021] | 80.159 (22.062) | 0.8156         |
| Cmax (ng/mL)                                                               | -0.2446 (0.0629) [0.0081] | 100.28 (34.117) | 0.7161         |
| AUC(0-5) (ng*h/mL)                                                         | -0.0594 (0.0155) [0.0086] | 97.13 (33.752)  | 0.7108         |
| <b>Week 5/3 1,5-AG Percent Change from Baseline/ Week 4/2 PK Parameter</b> |                           |                 |                |
| Ct(pre-dose) (ng/mL)                                                       | -0.2583 (0.0434) [0.0002] | 73.382 (16.436) | 0.7975         |
| Cmax (ng/mL)                                                               | -0.2124 (0.0420) [0.0007] | 81.673 (20.880) | 0.7393         |
| AUC(0-5) (ng*h/mL)                                                         | -0.0559 (0.0106) [0.0005] | 88.883 (21.368) | 0.7549         |

Abbreviations: 1,5-AG, 1,5-anhydroglucitol; AUC, area under the concentration-time curve; Cmax, maximum observed concentration; pre-dose concentration; SE, standard error, W2, Week2, W4, Week 4, W4/2, Week 4/2

**Supplemental Figure 1: Mean plasma maximal concentrations (C<sub>max</sub>) of GSK2141795 at various doses at Week 2 and Week 4.** Plot represent GSK2141795 mean (min, max) plasma C<sub>max</sub> at Week 2 (3 circles on the left) and Week 4 (3 circles on the right). Each circle represents a cohort per week at a specific dose; blue = 25 mg, red = 50 mg, and green = 75 mg. This plot clearly shows the overlap of C<sub>max</sub> for the various doses and a lack of a relationship between dose-plasma C<sub>max</sub>.

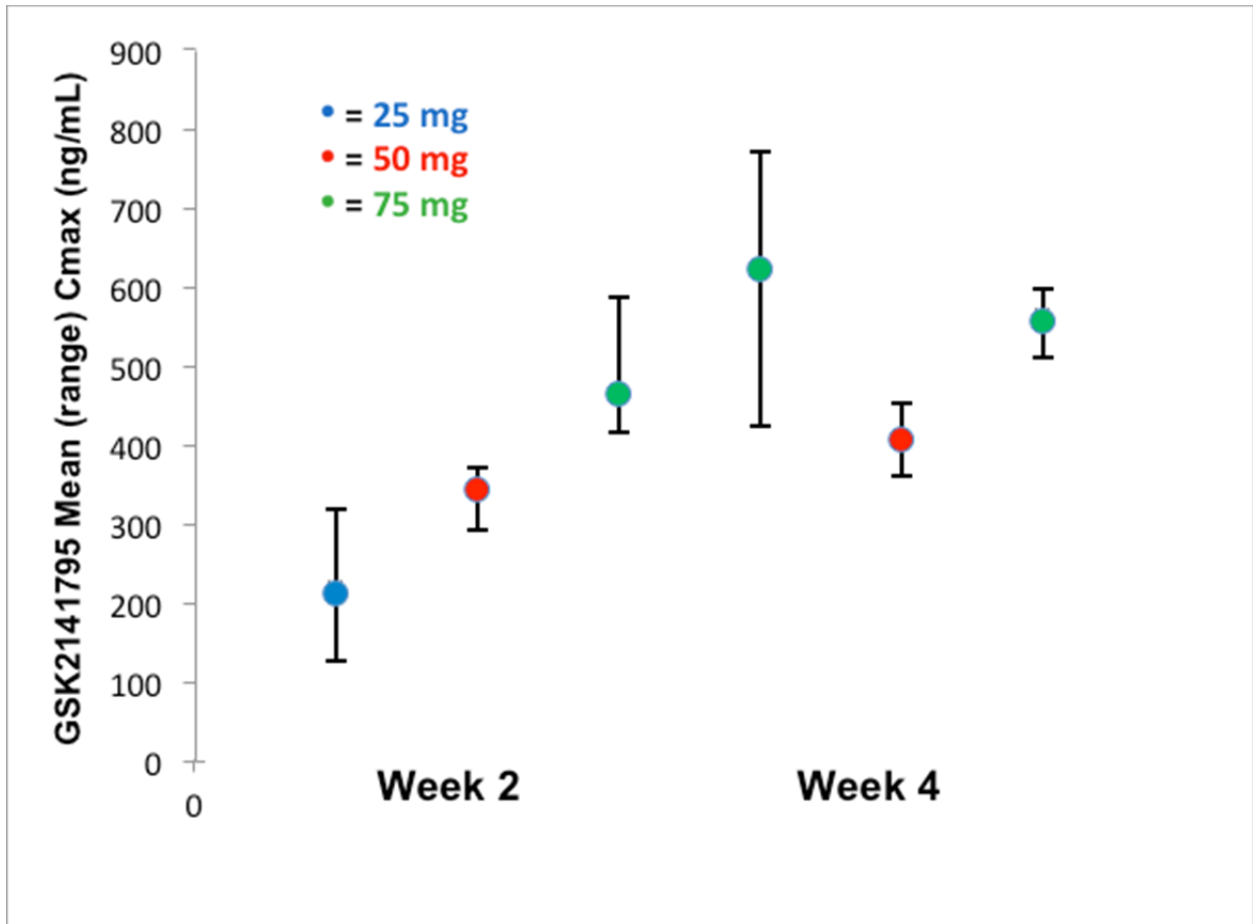



**Supplemental Figure 2: AIF versus IDF.** Scatter plot of  $K_i$  values for each tumor in each patient enrolled in Cohort 1. The solid line is a reference line with slope = 1.

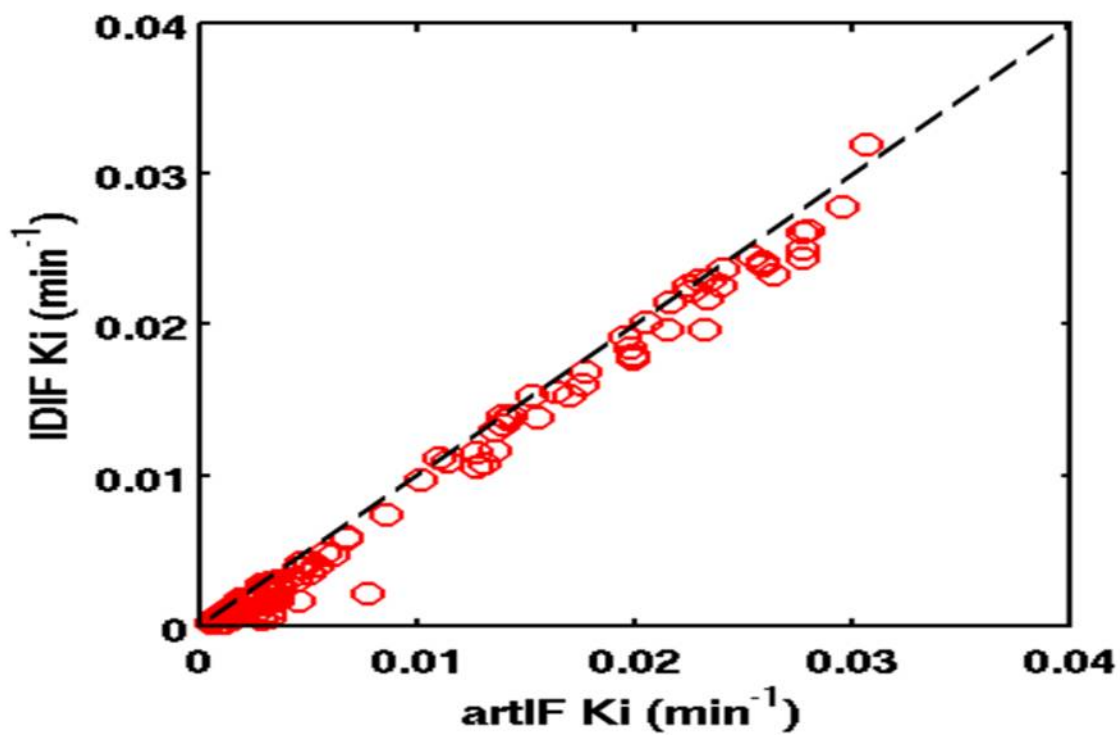

**Supplemental Figure 3: FDG uptake parameter Ki Values over Time.** Each patient is represented in an individual panel with individual tumors represented by separate lines. The X axis represents the time points (baseline, Week 2 and Week 4) at which the parameter Ki [(mL of plasma/mL of tissue)/min] were determined. Subjects were treated with 50 mg for 4 weeks (A), 75 mg for 4 weeks (B) and 25 mg for 2 weeks and 75 mg thereafter (C).

**Individual patient profiles over time – Ki from tumor tissue**

**A. Cohort I (50 mg for 4 weeks followed by dose escalation to 75 mg)**

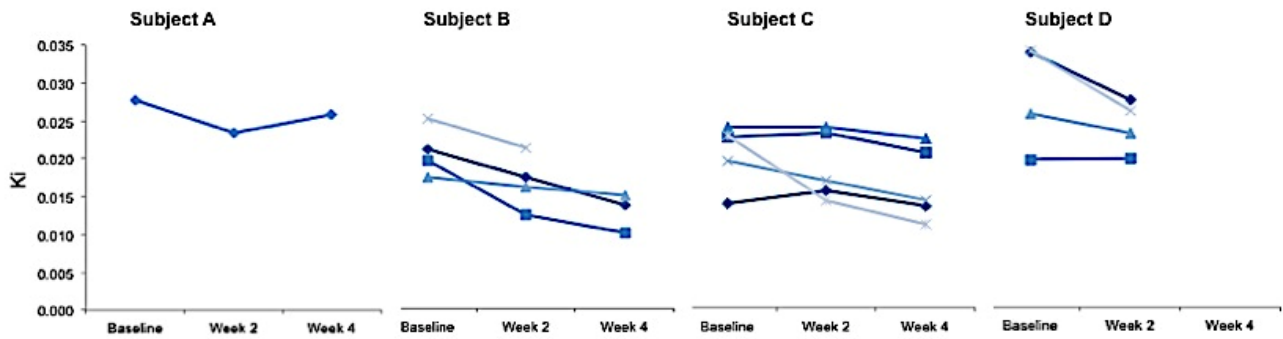

**B. Cohort 2 (75 mg continuously)**

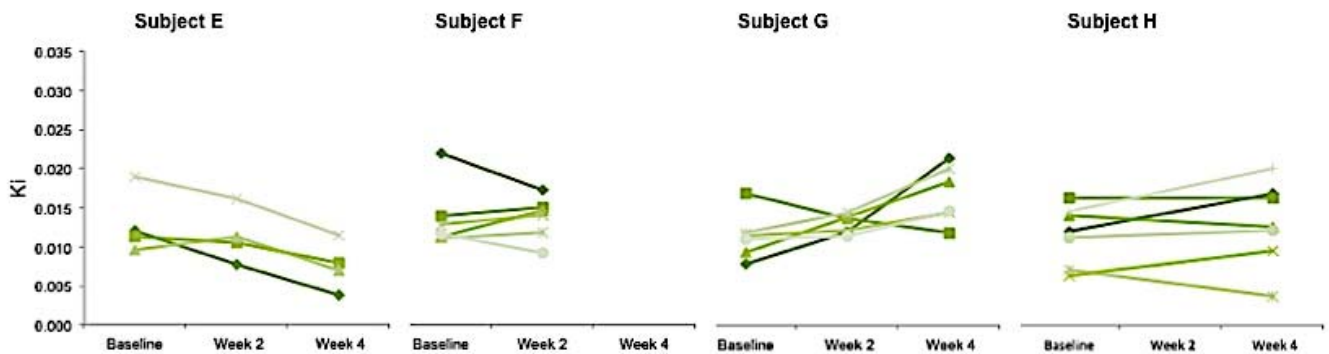

**C. Cohort 3 (25 mg for 2 weeks followed by dose escalation to 75 mg thereafter)**

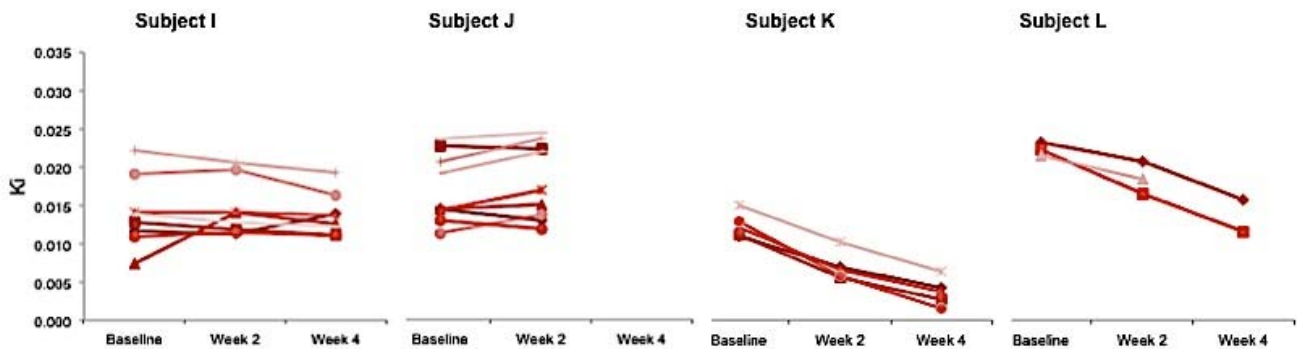

**Supplemental Figure 4: FDG uptake parameter MRfdg Values over Time.** Each patient is represented in an individual panel with individual tumors represented by separate lines. The X axis represents the time points (baseline, Week 2 and Week 4) at which the parameter MRfdg [ $\mu\text{mol}/\text{mL}$  of tissue)/min were determined. Subjects were treated with 50 mg for 4 weeks (A), 75 mg for 4 weeks (B) and 25 mg for 2 weeks and 75 mg thereafter (C).

**Individual patient profiles over time – MRfdg from tumor tissue**

**A. Cohort I (50 mg for 4 weeks followed by dose escalation to 75 mg)**

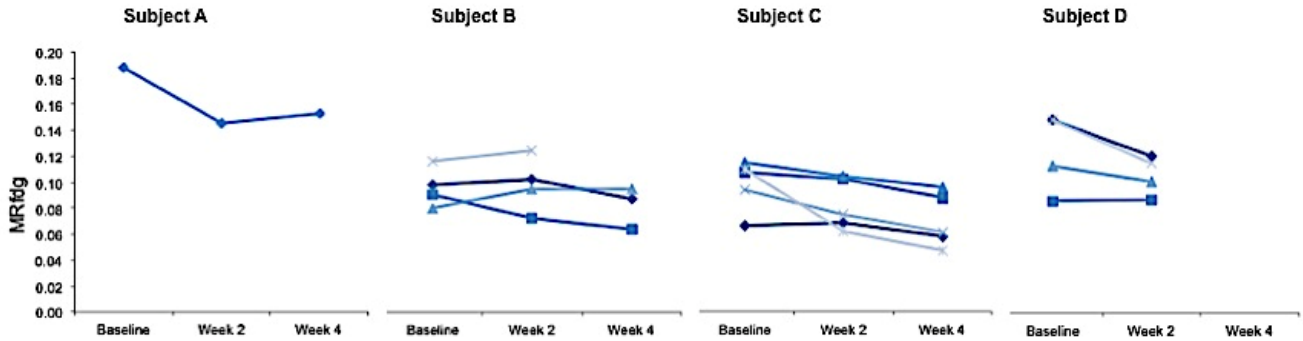

**B. Cohort 2 (75 mg continuously)**

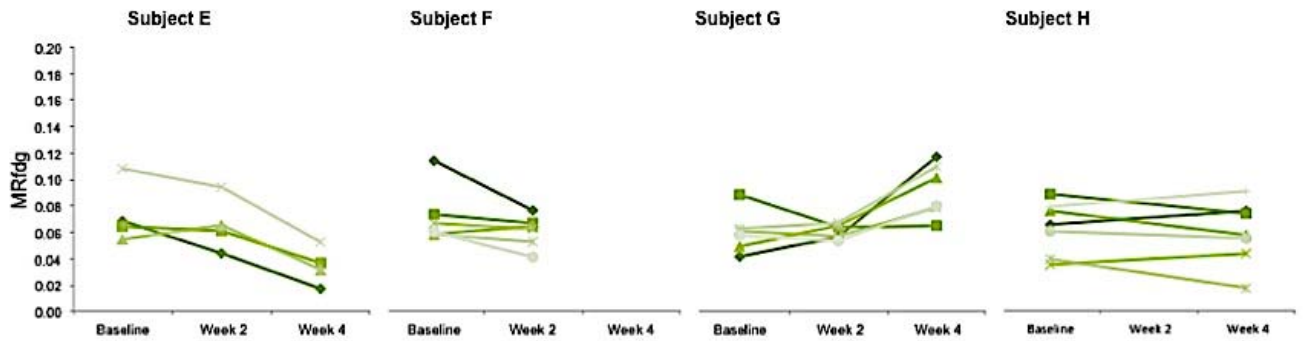

**C. Cohort 3 (25 mg for 2 weeks followed by dose escalation to 75 mg thereafter)**

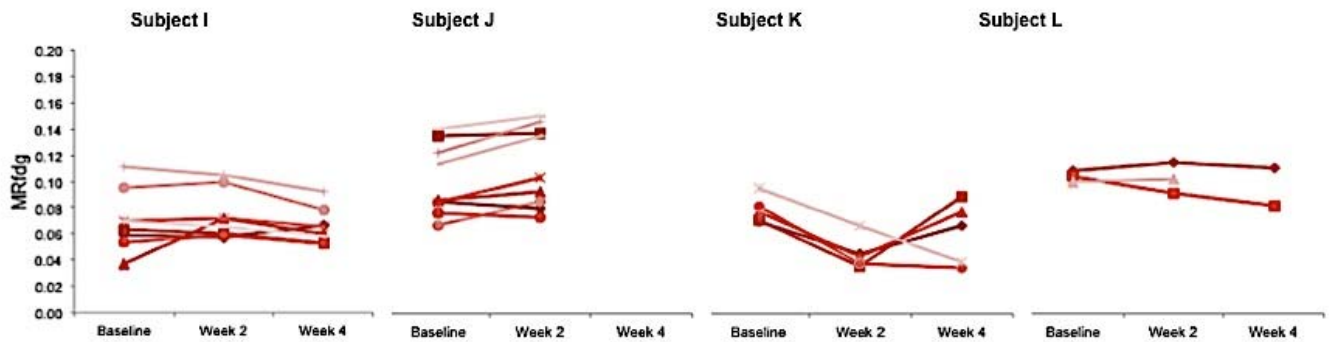

**Supplemental Figure 5: SUVmax(60-90) of dominant tumor(lesion with the highest FDG uptake) for each patient over time.** Each patient's dominant tumor is represented by separate lines at different time points (Baseline, Week 2 and Week 4) which SUVmax(60-90) were determined for that lesion. Decrease in SUVmax of dominant tumors was significant ( $p=0.04$ ) at Week 2 but non-significant at Week 4 ( $p=0.128$ ). For subject B dominant tumor has disappeared at Week 4, following 4 weeks daily 50 mg oral GSK2141795.

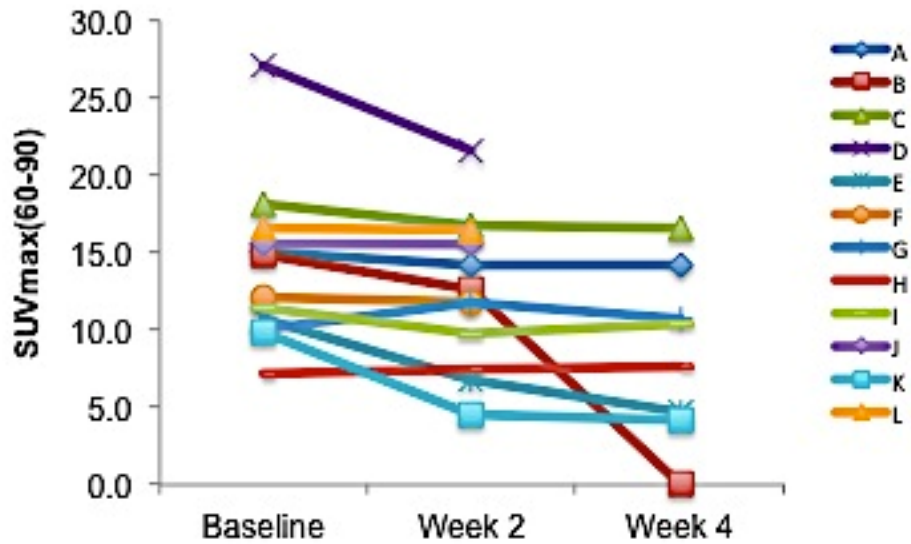

**Supplemental Figure 6: Linear Regression Analysis of PK/PD Relationships.** (A) The greatest percent change from baseline for SUVmax(60-90) averaged over tumors versus Cmax. (B) The greatest percent change from baseline irrespective of week for SUVmax(60-90) for an individual tumor versus Cmax. (C) The greatest percent change from baseline for MRfdg averaged over tumors versus Cmax. (D) The greatest percent change from baseline irrespective of week for MRfdg for an individual tumor versus Cmax. Each point represents the data from one patient. The solid line represents the linear regression line with the dotted lines representing 90% confidence intervals. Regression estimates, the  $r^2$ , and p-values associated with tests assessing the significance of the regression slope are provided.

**A**

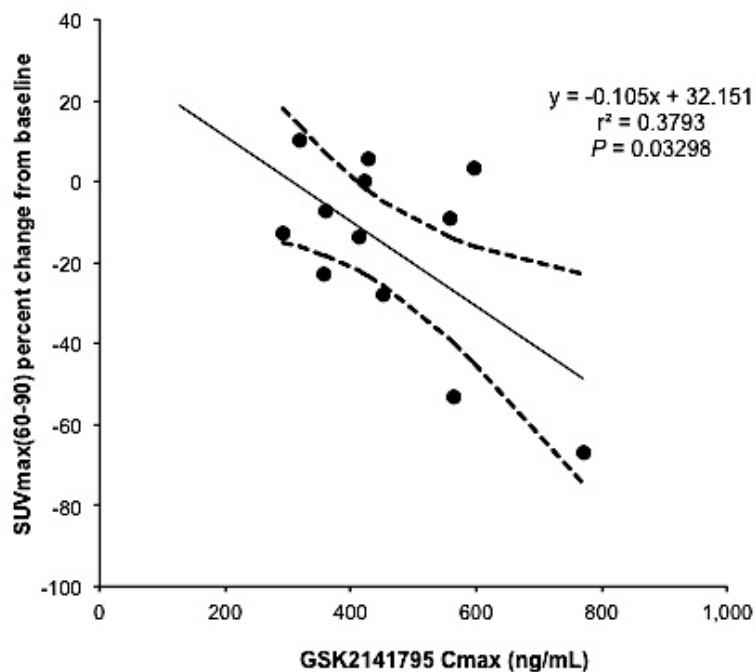

**B**

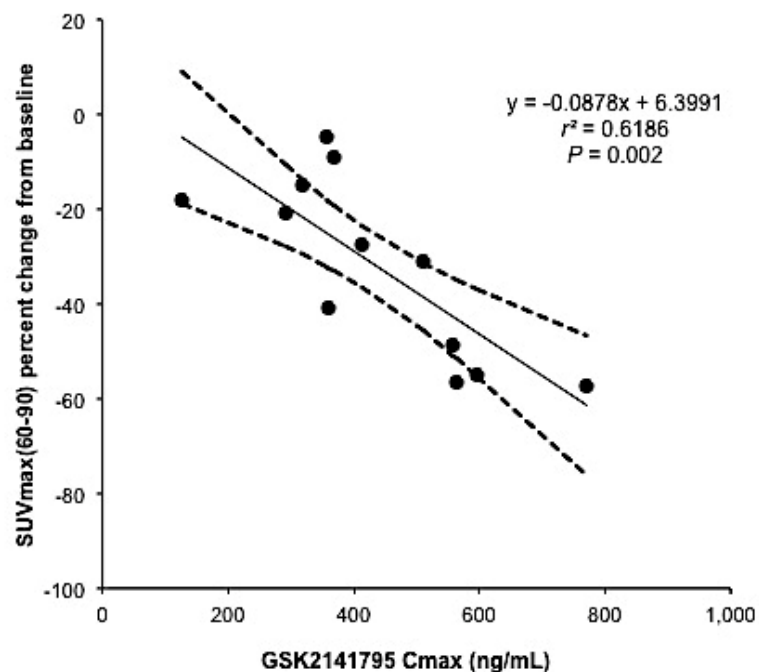

**C**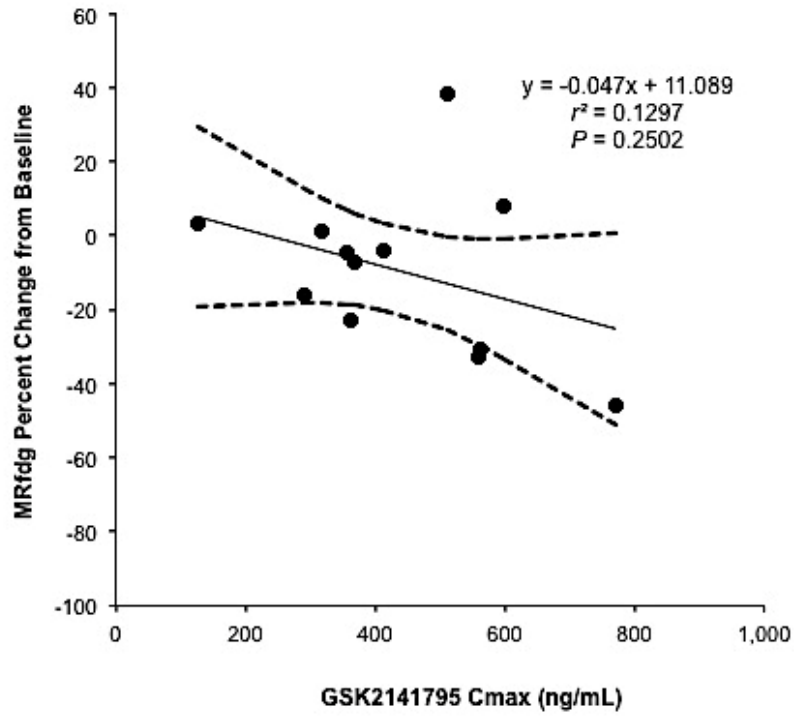**D**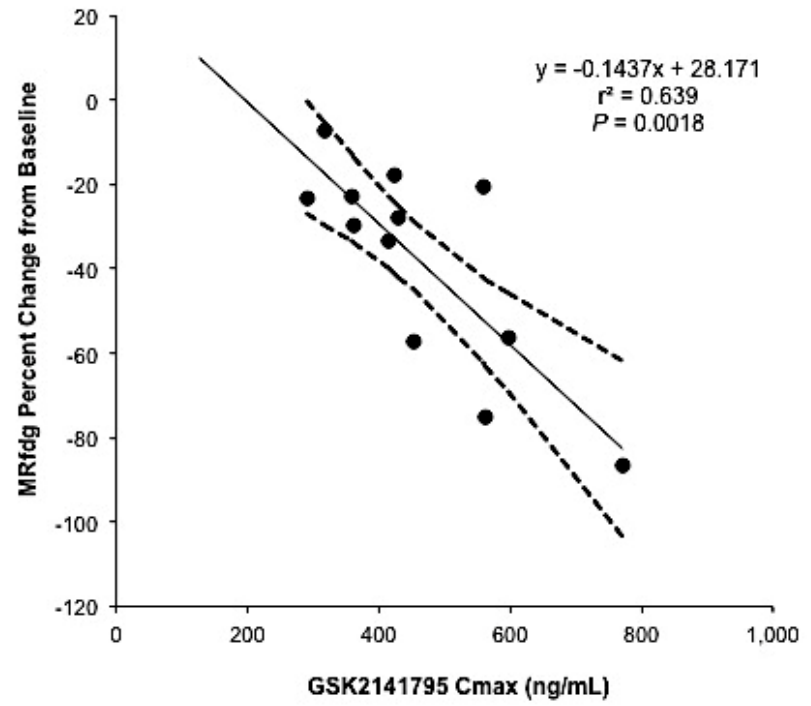

Supplement: 156505_Supplemental_Data.pdf [file 156505_Supplemental_Data.pdf]
